# Supplementary material for: Predictions of the glass transition temperature and viscosity of organic aerosols from volatility distributions
Source: Copernicus journal article supplement (doi:10.5194/acp-20-8103-2020), 2020-07-13
Supplement: Supplementary file 1 [file acp-20-8103-2020-supplement.zip]

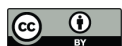

## *Supplement of*

# **Predictions of the glass transition temperature and viscosity of organic aerosols from volatility distributions**

**Ying Li et al.**

*Correspondence to:* Ying Li ([yingl47@uci.edu](mailto:yingl47@uci.edu)) and Manabu Shiraiwa ([m.shiraiwa@uci.edu](mailto:m.shiraiwa@uci.edu))

- [acp-20-8103-2020-supplement-title-page.pdf](#)
- [Li et al. OA viscosity\\_Table S2.xls](#)
- [Li et al. OA viscosity\\_Table S3.xls](#)
- [SI Li et al. OA viscosity ACP.pdf](#)

The copyright of individual parts of the supplement might differ from the CC BY 4.0 License.
