# Supplementary material for: Predictions of the glass transition temperature and viscosity of organic aerosols from volatility distributions
Source: Copernicus journal article supplement (doi:10.5194/acp-20-8103-2020), 2020-07-13
Supplement: Supplementary file 1 [file Li et al. OA viscosity_Table S2.xls]

## Sheet: Sheet1
Table S2 Organic compounds with their Tg estimated from Tm applying the Boyer-Kauzmann rule. Other 337 organic compounds included in the training dataset with measured Tg can be found in Koop et al. (2011), Rothfuss and Petters (2017), Lessmeier et al. (2018) and Zhang et al., (2019).
CAS	#C	#H	#N	#O	#S	Molar mass (g/mol)	Measured C0 (μg/m3)	Estimated C0 (μg/m3)	Measured Tm (K)	Estimated Tm (K)	Estimated Tg (K)	Data source
000050-00-0	1	2	0	1	0	30.026	6.27358e+09	5.63428e+09	181.15		126.805	MPBPWIN (Melting Pt, Boiling Pt, Vapor Pressure) Program Test Sets, can be downloaded in http://esc.syrres.com/interkow/EpiSuiteData.htm
000050-21-5	3	6	0	3	0	90.079	393754	138516	289.95		202.965
000050-32-8	20	12	0	0	0	252.32	0.07445	0.0133169	449.65		314.755
000050-36-2	17	21	1	4	0	303.36	3.11435	210.341	371.15		259.805
000050-78-2	9	8	0	4	0	180.16	244.098	635.43	408.15		285.705
000051-28-5	6	4	2	5	0	184.11	3861.66	127.732	388.65		272.055
000051-79-6	3	7	1	2	0	89.095	1.2553e+06	1.9876e+06	322.15		225.505
000053-70-3	22	44	0	0	0	278.36	0.0158287	0.000230387	542.65		379.855
000054-11-5	10	14	2	0	0	162.24	331276	278969	194.15		135.905
000055-18-5	4	10	2	1	0	102.14	4.72052e+06	8.39814e+06
000055-63-0	3	5	3	9	0	227.09	4886.27	332266	286.65		200.655
000056-49-5	21	16	0	0	0	268.36	0.620147	0.337475	453.15		317.205
000056-55-3	18	12	0	0	0	228.3	2.57659	3.3373	357.15		250.005
000056-81-5	3	8	0	3	0	92.095	831.742	395.077	291.35		203.945
000056-86-0	5	9	1	4	0	147.13	0.13448	8.70165	497.15		348.005
000056-87-1	6	14	2	2	0	146.19	0.0415152	0.0361412	497.65		348.355
000057-06-7	4	5	1	0	1	99.155	1.97012e+07	1.94455e+07	193.15
000057-10-3	16	32	0	2	0	256.43	5.23498	760.45	334.95		234.465
000057-11-4	18	36	0	2	0	284.49	11.0359	127.002	341.95		239.365
000057-13-6	1	4	2	1	0	60.056	38.7457	671593	405.85		284.095
000057-14-7	2	8	2	0	0	60.099	5.26296e+08	5.4244e+08	215.15		150.605
000057-55-6	3	8	0	2	0	76.096	527588	453971	213.15		149.205
000058-86-6	5	10	0	5	0	150.13	0.00159019	6.05402	363.65		254.555
000059-52-9	3	8	0	1	2	124.22	33364.4	98091.3
000060-00-4	10	16	2	8	0	292.25	2.35703e-05	5.92401e-05	518.15		362.705
000060-09-3	12	11	3	0	0	197.24	14.8418	55.7627	400.15		280.105
000060-11-7	14	15	3	0	0	225.3	0.847563	450.419	390.15		273.105
000060-12-8	8	10	0	1	0	122.17	569864	159536	246.15		172.305
000060-24-2	2	6	0	1	1	78.134	7.37073e+06	3.61401e+06
000060-29-7	4	10	0	1	0	74.124	2.14242e+09	2.14641e+09	156.85		109.795
000060-33-3	18	32	0	2	0	280.45	13.0788	864.891	264.65		185.255
000060-34-4	1	6	2	0	0	46.072	1.23771e+08	1.57684e+08	220.75		154.525
000060-35-5	2	5	1	1	0	59.068	127000	102552	354.15		247.905
000061-82-5	2	4	4	0	0	84.081	1.98895	3322.45	432.15		302.505
000062-44-2	10	13	1	2	0	179.22	6.66578	26297.1	410.65		287.455
000062-50-0	3	8	0	3	1	124.16	1.37461e+06	1.22114e+06
000062-53-3	6	7	1	0	0	93.129	2.45228e+06	3.95869e+06	267.15		187.005
000062-56-6	1	4	2	0	1	76.12	11451.5	239255	455.15
000062-75-9	2	6	2	1	0	74.083	1.07519e+07	1.71235e+07
000063-25-2	12	11	1	1	0	201.23	13.5395	530.628	418.15		292.705
000063-75-2	8	13	1	2	0	155.2	659781	1.91845e+06	430.65		301.455
000064-17-5	2	6	0	1	0	46.07	1.46694e+08	1.50753e+08	159.05		111.335
000064-18-6	1	2	0	2	0	46.026	1.05428e+08	8.88677e+07	281.45		197.015
000064-19-7	2	4	0	2	0	60.053	5.07892e+07	5.55356e+07	289.75		202.825
000064-67-5	4	10	0	4	1	154.19	1.7569e+06	1.99724e+06	249.15		174.405
000065-85-0	7	6	0	2	0	122.12	4595.68	19564.5	395.55		276.885
000066-22-8	4	4	2	2	0	112.09	281.466	0.0861878	611.15		427.805
000066-25-1	6	12	0	1	0	100.16	6.0594e+07	5.14996e+07	217.15		152.005
000067-52-7	4	4	2	3	0	128.09	0.103322	0.00385735	521.15		364.805
000067-56-1	1	4	0	1	0	32.042	2.18698e+08	2.04922e+08	175.55		122.885
000067-62-9	1	5	1	1	0	47.057	7.36185e+08	7.56242e+08
000067-63-0	3	8	0	1	0	60.097	1.46653e+08	1.60149e+08	183.65		128.555
000067-64-1	3	6	0	1	0	58.081	7.22554e+08	7.77175e+08	178.35		124.845
000067-68-5	2	6	0	1	1	78.134	2.56045e+06	2.61082e+06	291.65		204.155
000068-11-1	2	4	0	2	1	92.117	429733	2.0546e+06	256.65		179.655
000068-12-2	3	7	1	1	0	73.095	1.52029e+07	1.37101e+07	212.75		148.925
000069-72-7	7	6	0	3	0	138.12	608.954	236.898	431.15		301.805
000071-23-8	3	8	0	1	0	60.097	6.77728e+07	7.49084e+07	147.05		102.935
000071-36-3	4	10	0	1	0	74.124	2.66808e+07	3.09815e+07	183.35		128.345
000071-41-0	5	12	0	1	0	88.151	1.04183e+07	1.25493e+07	194.25		135.975
000071-43-2	6	6	0	0	0	78.115	3.97919e+08	3.66018e+08	278.65		195.055
000072-48-0	14	8	0	4	0	240.22	0.0113073	0.00092344	562.65		393.855
000073-24-5	5	5	5	0	0	135.13	0.000324011	0.0177988	633.15		443.205
000074-31-7	18	16	2	0	0	260.34	0.0888741	8.03113	417.15		292.005
000074-82-8	1	4	0	0	0	16.043	4.01053e+11	4.572e+11	90.75		63.525
000074-84-0	2	6	0	0	0	30.07	5.08861e+10	3.2611e+10	90.35		63.245
000074-85-1	2	4	0	0	0	28.054	7.85484e+10	4.73129e+10	104.15		72.905
000074-86-2	2	2	0	0	0	26.038	5.1069e+10	2.53247e+10	192.45		134.715
000074-89-5	1	5	1	0	0	31.058	4.42078e+09	3.83691e+09	179.75		125.825
000074-90-8	1	1	1	0	0	27.026	1.07796e+09	1.07955e+09	259.75		181.825
000074-93-1	1	4	0	0	1	48.107	3.89782e+09	3.90041e+09	150.15
000074-98-6	3	8	0	0	0	44.097	1.69345e+10	1.45383e+10	85.55		59.885
000074-99-7	3	4	0	0	0	40.065	9.26884e+09	7.89983e+09	170.45		119.315
000075-04-7	2	7	1	0	0	45.085	2.53785e+09	3.70506e+08	191.95		134.365
000075-05-8	2	3	1	0	0	41.053	1.95924e+08	4.41271e+08	229.35		160.545
000075-07-0	2	4	0	1	0	44.054	2.13575e+09	2.15469e+09	150.15		105.105
000075-08-1	2	6	0	0	1	62.134	1.76598e+09	1.73495e+09	125.35
000075-12-7	1	3	1	1	0	45.041	147718	317231	275.7		192.99
000075-18-3	2	6	0	0	1	62.134	1.67606e+09	1.59815e+09	174.85
000075-19-4	3	6	0	0	0	42.081	1.22366e+10	1.0894e+10	145.75		102.025
000075-21-8	2	4	0	1	0	44.054	3.11128e+09	2.95974e+09	161.45		113.015
000075-28-5	4	10	0	0	0	58.124	8.14941e+09	8.08387e+09	134.85		94.395
000075-31-0	3	9	1	0	0	59.112	1.84023e+09	1.8796e+09	178.05		124.635
000075-33-2	3	8	0	0	1	76.161	1.13227e+09	1.0838e+09	142.65
000075-50-3	3	9	1	0	0	59.112	5.10222e+09	5.334e+09	156.07		109.249
000075-52-5	1	3	1	2	0	61.041	1.17649e+08	1.1719e+08	244.65		171.255
000075-55-8	3	7	1	0	0	57.096	4.29432e+08	4.57038e+08	208.15		145.705
000075-56-9	3	6	0	1	0	58.081	1.6792e+09	1.66047e+09	161.25		112.875
000075-64-9	4	11	1	0	0	73.139	1.46136e+09	1.39851e+09	200.5		140.35
000075-65-0	4	10	0	1	0	74.124	1.62076e+08	1.86765e+08	298.55		208.985
000075-75-2	1	4	0	3	1	96.105	2211.09	137935	293.15		205.205
000075-83-2	6	14	0	0	0	86.178	1.47757e+09	1.43467e+09	174.15		121.905
000075-84-3	5	12	0	1	0	88.151	7.57695e+07	2.41989e+07	325.65		227.955
000075-85-4	5	12	0	1	0	88.151	7.90844e+07	8.382e+07	264.05		184.835
000075-86-5	4	7	1	1	0	85.106	1.55979e+06	1.87083e+06	254.15		177.905
000075-91-2	4	10	0	2	0	90.123	2.64682e+07	1.84527e+08	265.15		185.605
000075-97-8	6	12	0	1	0	100.16	1.69513e+08	1.80813e+08	220.65		154.455
000075-98-9	5	10	0	2	0	102.13	2.74449e+06	8.45303e+06	308.15		215.705
000076-22-2	10	16	0	1	0	152.24	5.31678e+06	87522.3	453.15		317.205
000076-49-3	12	20	0	2	0	196.29	2.40482e+06	1.12858e+06	302.15		211.505
000077-73-6	10	12	0	0	0	132.21	1.62952e+07	1.17206e+07	272.15		190.505
000077-74-7	6	14	0	1	0	102.18	3.05187e+07	3.37572e+07	249.55		174.685
000077-75-8	6	10	0	1	0	98.146	2.76871e+07	2.94801e+07	303.65		212.555
000077-76-9	5	12	0	2	0	104.15	5.69959e+08	4.79629e+08	226.15		158.305
000077-78-1	2	6	0	4	1	126.13	4.5904e+06	4.23104e+06	246.15		172.305
000077-92-9	6	8	0	7	0	192.13	0.171515	0.0582736	426.15		298.305
000077-93-0	12	20	0	7	0	276.29	10203.7	2940.8
000077-99-6	6	14	0	3	0	134.18	323.775	304.305	331.15		231.805
000078-11-5	5	8	4	12	0	316.14	0.0926777	71.5914	413.65		289.555
000078-28-4	7	15	1	2	0	145.2	5.46207e+06	2.95732e+06	329.15		230.405
000078-59-1	9	14	0	1	0	138.21	3.25271e+06	1.84914e+06	265.05		185.535
000078-67-1	8	12	4	0	0	164.21	59130.3	12355.6	374.65		262.255
000078-70-6	10	18	0	1	0	154.25	1.32597e+06	689502
000078-78-4	5	12	0	0	0	72.151	2.66958e+09	2.66571e+09	113.25		79.275
000078-79-5	5	8	0	0	0	68.12	2.01263e+09	2.01629e+09	127.25		89.075
000078-81-9	4	11	1	0	0	73.139	5.42118e+08	5.49974e+08	188.15		131.705
000078-82-0	4	7	1	0	0	69.107	1.21419e+08	1.17706e+08	201.65		141.155
000078-83-1	4	10	0	1	0	74.124	4.1614e+07	5.33615e+07	165.15		115.605
000078-84-2	4	8	0	1	0	72.108	6.70301e+08	6.3543e+08	207.25		145.075
000078-85-3	4	6	0	1	0	70.092	5.83877e+08	5.27373e+08	192.15		134.505
000078-90-0	3	10	2	0	0	74.127	4.22352e+07	6.37152e+07
000078-92-2	4	10	0	1	0	74.124	7.29938e+07	8.20334e+07
000078-93-3	4	8	0	1	0	72.108	3.51036e+08	3.81646e+08	186.55		130.585
000078-96-6	3	9	1	1	0	75.111	1.89693e+06	3.09966e+06	298.15		208.705
000078-97-7	3	5	1	1	0	71.079	454289	775615	233.15		163.205
000079-05-0	3	7	1	1	0	73.095	148493	197598	354.45		248.115
000079-06-1	3	5	1	1	0	71.079	26745.3	489057	357.65		250.355
000079-09-4	3	6	0	2	0	74.08	1.40572e+07	2.40525e+07	252.45		176.715
000079-10-7	3	4	0	2	0	72.064	1.53821e+07	2.33249e+07	286.65		200.655
000079-14-1	2	4	0	3	0	76.052	81796.6	69527.1	352.65		246.855
000079-16-3	3	7	1	1	0	73.095	1.72849e+06	950670	301.15		210.805
000079-20-9	3	6	0	2	0	74.08	8.60952e+08	2.09862e+08	175.15		122.605
000079-21-0	2	4	0	3	0	76.052	5.91389e+07	9.93828e+07	272.95		191.065
000079-24-3	2	5	1	2	0	75.068	8.41065e+07	8.23347e+07	183.65		128.555
000079-29-8	6	14	0	0	0	86.178	1.08757e+09	1.05055e+09	144.35		101.045
000079-31-2	4	8	0	2	0	88.107	8.57142e+06	1.54854e+07	227.15		159.005
000079-39-0	4	7	1	1	0	85.106	388345	132650	383.15		268.205
000079-41-4	4	6	0	2	0	86.091	4.58168e+06	1.0089e+07	289.15		202.405
000079-46-9	3	7	1	2	0	89.095	8.24257e+07	7.42358e+07	181.85		127.295
000079-92-5	10	16	0	0	0	136.24	1.83332e+07	1.30272e+07	324.35		227.045
000080-15-9	9	12	0	2	0	152.19	26747.5	568486	264.15		184.905
000080-46-6	11	16	0	1	0	164.25	17650.8	10237.5	368.15		257.705
000080-56-8	10	16	0	0	0	136.24	3.47635e+07	2.94209e+07	209.15		146.405
000080-59-1	5	8	0	2	0	100.12	717873	2.41085e+06	337.65		236.355
000080-62-6	5	8	0	2	0	100.12	2.07182e+08	1.97496e+08	225.15		157.605
000081-64-1	14	8	0	4	0	240.22	0.31397	0.00919566	473.15		331.205
000081-81-2	19	16	0	4	0	308.34	1.92265	0.000185635	434.15		303.905
000082-34-8	14	7	1	4	0	253.22	0.0544593	0.230091	504.65		353.255
000082-38-2	15	11	1	2	0	237.26	0.0892767	3.90267	444.15		310.905
000082-39-3	15	10	0	3	0	238.25	3.5349	14.2165
000082-45-1	14	9	1	2	0	223.23	0.0600021	0.229208	526.65		368.655
000082-66-6	23	16	0	3	0	340.38	0.00188455	0.0373251	419.65		293.755
000083-32-9	12	10	0	0	0	154.21	17817.7	10690.6	366.55		256.585
000083-34-1	9	9	1	0	0	131.18	39089.9	16214	370.65		259.455
000083-41-0	8	9	1	2	0	151.17	2.91718e+06	376227	288.15		201.705
000084-15-1	18	14	0	0	0	230.31	3094.28	2240.26	329.35		230.545
000084-61-7	20	26	0	4	0	330.43	15.4321	81.3338	339.15		237.405
000084-64-0	18	24	0	4	0	304.39	78.0339	875.223
000084-65-1	14	8	0	2	0	208.22	1.29841	0.4287	559.15		391.405
000084-66-2	12	14	0	4	0	222.24	25087.9	30344.4	232.65		162.855
000084-74-2	16	22	0	4	0	278.35	300.699	3410.92	238.15		166.705
000084-75-3	20	30	0	4	0	334.46	251.632	354.082	215.15		150.605
000085-01-8	14	10	0	0	0	178.24	1159.04	413.805	372.35		260.645
000085-02-9	13	9	1	0	0	179.22	539.427	1310.04	367.15		257.005
000085-44-9	8	4	0	3	0	148.12	4117.6	1768.1	403.95		282.765
000085-68-7	19	20	0	4	0	312.37	138.516	738.752
000086-28-2	14	13	1	0	0	195.27	2311.75	2329.59
000086-55-5	11	8	0	2	0	172.19	81.8132	726.59	434.15		303.905
000086-57-7	10	7	1	2	0	173.17	4468.68	6786.8	334.15		233.905
000086-73-7	13	10	0	0	0	166.22	5359.83	2947.91	387.95		271.565
000086-74-8	12	9	1	0	0	167.21	6.74015	3.64867	519.35		363.545
000087-41-2	8	6	0	2	0	134.14	14422	8004.23	348.15		243.705
000087-59-2	8	11	1	0	0	121.18	488358	787884
000087-62-7	8	11	1	0	0	121.18	846487	1.10043e+06	284.35		199.045
000087-66-1	6	6	0	3	0	126.11	3247.86	79.3319	406.15		284.305
000087-85-4	12	18	0	0	0	162.28	7497.3	4045.06	439.65		307.755
000088-09-5	6	12	0	2	0	116.16	1.17357e+06	3.03379e+06	241.35		168.945
000088-18-6	10	14	0	1	0	150.22	726483	428625	266.35		186.445
000088-69-7	9	12	0	1	0	136.2	723740	659410	288.65		202.055
000088-72-2	7	7	1	2	0	137.14	1.3872e+06	869950	263.15		184.205
000088-74-4	6	6	2	2	0	138.13	20570.8	12401.9	344.15		240.905
000088-75-5	6	5	1	3	0	139.11	845249	356800	317.95		222.565
000088-89-1	6	3	3	7	0	229.11	9.24248	4.68285	395.65		276.955
000088-99-3	8	6	0	4	0	166.13	5.68499	6.85165	503.15		352.205
000089-78-1	10	20	0	1	0	156.27	926966	64389	308.15		215.705
000089-82-7	10	16	0	1	0	152.24	1.0061e+06	1.3251e+06
000089-83-8	10	14	0	1	0	150.22	17758.5	134803	324.65		227.255
000089-87-2	8	9	1	2	0	151.17	465448	260027	282.15		197.505
000090-00-6	8	10	0	1	0	122.17	1.00448e+06	971657	291.15		203.805
000090-02-8	7	6	0	2	0	122.12	3.89319e+06	1.45749e+06	266.15		186.305
000090-04-0	7	9	1	1	0	123.16	529525	708240	279.35		195.545
000090-05-1	7	8	0	2	0	124.14	687307	754035	305.15		213.605
000090-12-0	11	10	0	0	0	142.2	511982	281208	242.75		169.925
000090-15-3	10	8	0	1	0	144.17	2123.27	2123.27	368.15		257.705
000090-43-7	12	10	0	1	0	170.21	18296.6	6458.7	332.15		232.505
000091-01-0	13	12	0	1	0	184.24	270.316	585.19	342.15		239.505
000091-08-7	9	6	2	2	0	174.16	195698	853020	291.45		204.015
000091-16-7	8	10	0	2	0	138.17	3.49035e+06	1.98281e+06	295.65		206.955
000091-17-8	10	18	0	0	0	138.25	1.70804e+07	6.99554e+06	230.15		161.105
000091-20-3	10	8	0	0	0	128.18	585491	278281	353.35		247.345
000091-22-5	9	7	1	0	0	129.16	416517	374171	258.37		180.859
000091-23-6	7	7	1	3	0	153.14	29640.5	51706.2	283.65		198.555
000091-52-1	9	10	0	4	0	182.18	34445.7	1400.55	382.15		267.505
000091-57-6	11	10	0	0	0	142.2	420284	263633	307.55		215.285
000091-59-8	10	9	1	0	0	143.19	1970.01	2039.26	386.15		270.305
000091-62-3	10	9	1	0	0	143.19	49327.1	103118	251.15		175.805
000091-63-4	10	9	1	0	0	143.19	72797.9	252407	271.65		190.155
000091-64-5	9	6	0	2	0	146.15	7699.64	5161.9	344.15		240.905
000091-66-7	10	15	1	0	0	149.24	1.09288e+06	1.26688e+06	234.35		164.045
000092-06-8	18	14	0	0	0	230.31	216.599	202.985	360.15		252.105
000092-24-0	18	12	0	0	0	228.3	0.030551	0.0168092	630.15		441.105
000092-51-3	12	22	0	0	0	166.31	964769	722684	277.15		194.005
000092-52-4	12	10	0	0	0	154.21	74005.5	62071.8	342.15		239.505
000092-54-6	10	14	2	0	0	162.24	47477.1	135.126
000092-94-4	18	14	0	0	0	230.31	1.23771	4.23297	483.25		338.275
000093-07-2	9	10	0	4	0	182.18	2414.24	228.202	454.15		317.905
000093-08-3	12	10	0	1	0	170.21	5585.95	8288.36	329.15		230.405
000093-09-4	11	8	0	2	0	172.19	61.4038	45.1689	458.65		321.055
000093-15-2	11	14	0	2	0	178.23	114946	33238.5	269.15		188.405
000093-28-7	12	14	0	3	0	206.24	35374.1	52656.5	303.65		212.555
000093-53-8	9	10	0	1	0	134.18	1.94697e+06	2.18494e+06
000093-55-0	9	10	0	1	0	134.18	1.22587e+06	1.07444e+06	291.75		204.225
000093-58-3	8	8	0	2	0	136.15	2.78108e+06	2.77377e+06	258.15		180.705
000093-89-0	9	10	0	2	0	150.18	2.15523e+06	1.59019e+06	239.15		167.405
000093-97-0	14	10	0	3	0	226.23	1431.45	643.362	315.65		220.955
000093-99-2	13	10	0	2	0	198.22	18113.6	3633.38	344.15		240.905
000094-02-0	11	12	0	3	0	192.22	4215.54	46081.6
000094-46-2	12	16	0	2	0	192.26	1.46593e+06	156016
000094-96-2	8	18	0	2	0	146.23	23570.3	23570.3	233.15		163.205
000095-13-6	9	8	0	0	0	116.16	6.86661e+06	5.46832e+06	271.35		189.945
000095-47-6	8	10	0	0	0	106.17	3.7705e+07	3.88458e+07	247.95		173.565
000095-48-7	7	8	0	1	0	108.14	1.73775e+06	1.45297e+06	302.95		212.065
000095-53-4	7	9	1	0	0	107.16	1.49709e+06	2.04411e+06	256.85		179.795
000095-54-5	6	8	2	0	0	108.14	11972.4	307.448	375.65		262.955
000095-63-6	9	12	0	0	0	120.2	1.3561e+07	1.04614e+07	229.35		160.545
000095-64-7	8	11	1	0	0	121.18	181669	306038	324.15		226.905
000095-65-8	8	10	0	1	0	122.17	233723	120801	333.95		233.765
000095-68-1	8	11	1	0	0	121.18	866672	1.15904e+06	258.85		181.195
000095-78-3	8	11	1	0	0	121.18	976716	1.15904e+06	288.65		202.055
000095-80-7	7	10	2	0	0	122.17	1116.09	3735.63
000095-87-4	8	10	0	1	0	122.17	1.02418e+06	208775	347.95		243.565
000095-92-1	6	10	0	4	0	146.14	3.25271e+06	5.7433e+06	232.55		162.785
000095-93-2	10	14	0	0	0	134.22	3.80958e+06	850900	352.45		246.715
000096-05-9	7	10	0	2	0	126.16	3.91235e+07	4.5226e+07
000096-09-3	8	8	0	1	0	120.15	1.93729e+06	3.12549e+06	237.55		166.285
000096-14-0	6	14	0	0	0	86.178	8.79313e+08	8.60801e+08	110.25		77.175
000096-22-0	5	10	0	1	0	86.135	1.74497e+08	1.84656e+08	234.15		163.905
000096-33-3	4	6	0	2	0	86.091	4.00597e+08	4.00319e+08	196.65		137.655
000096-37-7	6	12	0	0	0	84.163	6.21546e+08	6.01205e+08	130.65		91.455
000096-41-3	5	10	0	1	0	86.135	1.15236e+07	1.06906e+07	254.15		177.905
000096-47-9	5	10	0	1	0	86.135	4.50505e+08	4.81308e+08
000096-48-0	4	6	0	2	0	86.091	2.08258e+06	1.36525e+06	229.85		160.895
000096-49-1	3	4	0	3	0	88.064	46408.8	103236	312.65		218.855
000096-54-8	5	7	1	0	0	81.118	9.34809e+07	8.49985e+07
000096-70-8	12	18	0	1	0	178.28	172419	20786
000096-76-4	14	22	0	1	0	206.33	52878.3	29598.5	329.65		230.755
000096-80-0	8	19	1	1	0	145.25	624237	1.0456e+06	234.15		163.905
000097-53-0	10	12	0	2	0	164.21	199631	83665	264.05		184.835
000097-54-1	10	12	0	2	0	164.21	105552	33624.9	263.15		184.205
000097-56-3	14	15	3	0	0	225.3	9.08103	115.148	375.15		262.605
000097-62-1	6	12	0	2	0	116.16	1.58556e+08	1.51065e+08	184.95		129.465
000097-63-2	6	10	0	2	0	114.15	1.26314e+08	1.09812e+08
000097-64-3	5	10	0	3	0	118.13	2.38125e+07	6.858e+06
000097-85-8	8	16	0	2	0	144.22	3.35538e+07	3.31664e+07	192.45		134.715
000097-86-9	8	14	0	2	0	142.2	2.77387e+07	2.43e+07
000097-88-1	8	14	0	2	0	142.2	1.62e+07	1.91802e+07	198.15		138.705
000097-95-0	6	14	0	1	0	102.18	8.39814e+06	8.78237e+06
000097-99-4	5	10	0	2	0	102.13	4.39667e+06	1.493e+06
000098-00-0	5	6	0	2	0	98.102	3.2117e+06	2.15695e+06	258.55		180.985
000098-01-1	5	4	0	2	0	96.086	1.14171e+07	1.19854e+07	235.05		164.535
000098-06-6	10	14	0	0	0	134.22	1.5896e+07	1.1754e+07	215.35		150.745
000098-27-1	11	16	0	1	0	164.25	248965	191512	300.65		210.455
000098-52-2	10	20	0	1	0	156.27	587644	90665.1
000098-54-4	10	14	0	1	0	150.22	307335	36082	371.15		259.805
000098-55-5	10	18	0	1	0	154.25	350552	162431	310.65		217.455
000098-82-8	9	12	0	0	0	120.2	2.90593e+07	2.31829e+07	177.15		124.005
000098-83-9	9	10	0	0	0	118.18	1.2065e+07	1.23825e+07	249.95		174.965
000098-86-2	8	8	0	1	0	120.15	2.56368e+06	2.10519e+06	293.15		205.205
000098-95-3	6	5	1	2	0	123.11	1.62167e+06	1.39e+06	278.85		195.195
000099-04-7	8	8	0	2	0	136.15	1730.13	12441.7	381.85		267.295
000099-08-1	7	7	1	2	0	137.14	1.5143e+06	519021	288.65		202.055
000099-09-2	6	6	2	2	0	138.13	709.951	1396.14	387.15		271.005
000099-35-4	6	3	3	6	0	213.11	73.84	1106.11	394.65		276.255
000099-51-4	8	9	1	2	0	151.17	29171.8	183644	303.65		212.555
000099-61-6	7	5	1	3	0	151.12	58888	36810.1	331.65		232.155
000099-62-7	12	18	0	0	0	162.28	3.42609e+06	2.67636e+06	210.05		147.035
000099-65-0	6	4	2	4	0	168.11	8136.61	6717.22	363.15		254.205
000099-71-8	10	14	0	1	0	150.22	300118	67643.6	334.65		234.255
000099-82-1	10	20	0	0	0	140.27	2.02632e+07	1.43897e+07	185.55		129.885
000099-83-2	10	16	0	0	0	136.24	1.02681e+07	1.39786e+07
000099-85-4	10	16	0	0	0	136.24	7.95536e+06	8.41644e+06	263.15		184.205
000099-87-6	10	14	0	0	0	134.22	1.05281e+07	8.22056e+06	204.25		142.975
000099-88-7	9	13	1	0	0	135.21	606323	733748
000099-89-8	9	12	0	1	0	136.2	331022	110511	335.45		234.815
000099-94-5	8	8	0	2	0	136.15	371.611	2034.58	452.75		316.925
000099-96-7	7	6	0	3	0	138.12	1.42584	52.2067	487.65		341.355
000099-97-8	9	13	1	0	0	135.21	1.29154e+06	1.50382e+06
000099-99-0	7	7	1	2	0	137.14	115748	202743	324.75		227.325
000100-01-6	6	6	2	2	0	138.13	23.7641	154.466	419.15		293.405
000100-02-7	6	5	1	3	0	139.11	732.3	2169.22	386.95		270.865
000100-06-1	9	10	0	2	0	150.18	51983.9	107358	311.65		218.155
000100-10-7	9	11	1	1	0	149.19	29499	128291	347.65		243.355
000100-18-5	12	18	0	0	0	162.28	2.14458e+06	1.87433e+06	256.15		179.305
000100-21-0	8	6	0	4	0	166.13	82.184	106.303
000100-23-2	8	10	2	2	0	166.18	54.2236	5020.37	437.15		306.005
000100-37-8	6	15	1	1	0	117.19	8.81466e+06	4.07993e+06
000100-40-3	8	12	0	0	0	108.18	9.13044e+07	7.7879e+07	164.25		114.975
000100-41-4	8	10	0	0	0	106.17	5.47607e+07	4.32951e+07	178.25		124.775
000100-42-5	8	8	0	0	0	104.15	3.58183e+07	2.82629e+07	242.15		169.505
000100-43-6	7	7	1	0	0	105.14	9.60572e+06	1.63862e+07
000100-46-9	7	9	1	0	0	107.16	3.76001e+06	4.35884e+06	283.15		198.205
000100-47-0	7	5	1	0	0	103.12	4.25687e+06	3.10951e+06	260.45		182.315
000100-51-6	7	8	0	1	0	108.14	546315	310935	257.95		180.565
000100-52-7	7	6	0	1	0	106.13	7.24438e+06	5.76128e+06	247.15		173.005
000100-54-9	6	4	2	0	0	104.11	1.6566e+06	755542	324.15		226.905
000100-61-8	7	9	1	0	0	107.16	2.6084e+06	2.51051e+06	216.15		151.305
000100-63-0	6	8	2	0	0	108.14	151108	223757	292.75		204.925
000100-64-1	6	11	1	1	0	113.16	170266	66282.1	363.15		254.205
000100-66-3	7	8	0	1	0	108.14	2.0574e+07	1.96441e+07	235.65		164.955
000100-69-6	7	7	1	0	0	105.14	1.57082e+07	1.45216e+07
000100-71-0	7	9	1	0	0	107.16	2.81304e+07	2.46444e+07	210.05		147.035
000100-72-1	6	12	0	2	0	116.16	624237	1.12363e+06
000100-74-3	6	13	1	1	0	115.18	3.11284e+07	4.21441e+07	209.15		146.405
000100-76-5	7	13	1	0	0	111.19	1.14329e+07	1.36191e+06	431.15		301.805
000100-79-8	6	12	0	3	0	132.16	7.62336e+08	459589
000100-80-1	9	10	0	0	0	118.18	1.08013e+07	1.3208e+07	186.85		130.795
000100-97-0	6	12	4	0	0	140.19	30135.6	685584
000101-39-3	10	10	0	1	0	146.19	117852	196419
000101-42-8	9	12	2	1	0	164.21	330.953	676.027	406.65		284.655
000101-54-2	12	12	2	0	0	184.24	119.81	433.694	339.15		237.405
000101-68-8	15	10	2	2	0	250.26	67.2669	2542.69	311.15		217.805
000101-81-5	13	12	0	0	0	168.24	74223.9	110296	298.35		208.845
000101-83-7	12	23	1	0	0	181.32	329220	194805	273.05		191.135
000101-84-8	12	10	0	1	0	170.21	205837	155521	299.95		209.965
000102-01-2	10	11	1	2	0	177.2	500.062	296.227	359.15		251.405
000102-04-5	15	14	0	1	0	210.28	8346.8	3401.55	308.15		215.705
000102-07-8	13	12	2	1	0	212.25	85.9058	796.311	512.15		358.505
000102-09-0	13	10	0	3	0	214.22	1727.41	4560.37	356.15		249.305
000102-69-2	9	21	1	0	0	143.27	1.162e+07	2.33169e+07	179.65		125.755
000102-70-5	9	15	1	0	0	137.23	2.68357e+07	4.48983e+06	367.15		257.005
000102-71-6	6	15	1	3	0	149.19	28.7854	27.1016	293.65		205.555
000102-76-1	9	14	0	6	0	218.21	29093.8	61472.3
000102-77-2	11	12	2	1	2	252.36	45.2938	69.0256	358.15		250.705
000102-82-9	12	27	1	0	0	185.36	929844	1.56301e+06	203.15		142.205
000103-00-4	9	19	1	1	0	157.26	133321	33879.4
000103-09-3	10	20	0	2	0	172.27	2.12886e+06	3.508e+06	193.15		135.205
000103-11-7	11	20	0	2	0	184.28	1.7625e+06	1.81201e+06	183.15		128.205
000103-23-1	22	42	0	4	0	370.58	16.9244	63.7152	205.35		143.745
000103-26-4	10	10	0	2	0	162.19	300764	108101	309.15		216.405
000103-29-7	14	14	0	0	0	182.27	71281.2	24876.9	325.65		227.955
000103-30-0	14	12	0	0	0	180.25	8533.75	13367.3	396.15		277.305
000103-33-3	12	10	2	0	0	182.23	3535.66	10773.5	341.15		238.805
000103-36-6	11	12	0	2	0	176.22	30970.8	82778.1	280.15		196.105
000103-41-3	16	14	0	2	0	238.29	128.076	1262.83	312.15		218.505
000103-45-7	10	12	0	2	0	164.21	277118	602776	242.05		169.435
000103-49-1	14	15	1	0	0	197.28	8389.84	10569.5	247.15		173.005
000103-50-4	14	14	0	1	0	198.27	10974.7	23121.5	276.75		193.725
000103-65-1	9	12	0	0	0	120.2	2.20851e+07	1.68544e+07	173.65		121.555
000103-69-5	8	11	1	0	0	121.18	1.32833e+06	2.01855e+06	209.65		146.755
000103-70-8	7	7	1	1	0	121.14	23258.9	37571	319.15		223.405
000103-71-9	7	5	1	1	0	119.12	1.64578e+07	1.39603e+07
000103-72-0	7	5	1	0	1	135.19	1.08972e+07	908103	252.15
000103-73-1	8	10	0	1	0	122.17	1.00448e+07	1.03731e+07	243.65		170.555
000103-82-2	8	8	0	2	0	136.15	27810.8	28396.3	349.65		244.755
000103-84-4	8	9	1	1	0	135.17	1452.97	1503.82	387.45		271.215
000104-40-5	15	24	0	1	0	220.36	9678.37	8121.54	315.15		220.605
000104-46-1	10	12	0	1	0	148.21	557508	504943	294.45		206.115
000104-51-8	10	14	0	0	0	134.22	7.67324e+06	5.92745e+06	185.25		129.675
000104-54-1	9	10	0	1	0	134.18	173064	19325.5	306.15		214.305
000104-55-2	9	8	0	1	0	132.16	205359	239384	265.65		185.955
000104-72-3	16	26	0	0	0	218.39	15016.1	25457	258.75		181.125
000104-75-6	8	19	1	0	0	129.25	9.71873e+06	1.13848e+07	197.15		138.005
000104-76-7	8	18	0	1	0	130.23	951423	1.29422e+06	203.15		142.205
000104-85-8	8	7	1	0	0	117.15	1.97366e+06	812208	302.65		211.855
000104-87-0	8	8	0	1	0	120.15	1.61441e+06	1.8598e+06	267.15		187.005
000104-89-2	8	17	1	0	0	127.23	1.96077e+07	6.34225e+06
000104-90-5	8	11	1	0	0	121.18	9.31136e+06	6.83701e+06	202.25		141.575
000104-94-9	7	9	1	1	0	123.16	198572	126424	330.35		231.245
000105-05-5	10	14	0	0	0	134.22	7.64368e+06	6.63413e+06	230.32		161.224
000105-08-8	8	16	0	2	0	144.22	2386.74	1100.38
000105-30-6	6	14	0	1	0	102.18	1.05388e+07	7.84924e+06
000105-34-0	4	5	1	2	0	99.09	735201	1.87529e+06	250.65		175.455
000105-37-3	5	10	0	2	0	102.13	1.9678e+08	2.13521e+08	199.25		139.475
000105-40-8	4	9	1	2	0	103.12	5.01401e+06	8.64676e+06
000105-45-3	5	8	0	3	0	116.12	5.56819e+06	7.74054e+06	300.65		210.455
000105-46-4	6	12	0	2	0	116.16	1.0612e+08	1.39205e+08	174.25		121.975
000105-53-3	7	12	0	4	0	160.17	2.31613e+06	3.10827e+06	223.15		156.205
000105-54-4	6	12	0	2	0	116.16	7.99023e+07	9.11386e+07	175.15		122.605
000105-56-6	5	7	1	2	0	113.12	235940	1.32564e+06	250.65		175.455
000105-57-7	6	14	0	2	0	118.18	1.7526e+08	2.5019e+08	173.15		121.205
000105-58-8	5	10	0	3	0	118.13	6.858e+07	7.62e+07	230.15		161.105
000105-59-9	5	13	1	2	0	119.16	1278.84	15689.3	252.15		176.505
000105-60-2	6	11	1	1	0	113.16	9729.49	22013	342.45		239.715
000105-66-8	7	14	0	2	0	130.19	4.16591e+07	3.87565e+07	177.95		124.565
000105-67-9	8	10	0	1	0	122.17	669656	682786	297.65		208.355
000105-76-0	12	20	0	4	0	228.29	7643.89	65273.7	188.15		131.705
000105-87-3	12	20	0	2	0	196.29	348066	488347
000106-20-7	16	35	1	0	0	241.46	129691	68606.3	213.15		149.205
000106-22-9	12	20	0	1	0	156.27	426784	163701
000106-24-1	10	18	0	1	0	154.25	248701	131768
000106-27-4	9	18	0	2	0	158.24	8.07741e+06	8.58756e+06	199.95		139.965
000106-30-9	9	18	0	2	0	158.24	5.78173e+06	5.83274e+06	207.05		144.935
000106-31-0	8	14	0	3	0	158.2	2.40622e+06	3.06942e+06	198.15		138.705
000106-35-4	7	14	0	1	0	114.19	1.59503e+07	3.59496e+07	234.15		163.905
000106-36-5	6	12	0	2	0	116.16	8.70311e+07	8.73932e+07	197.25		138.075
000106-42-3	8	10	0	0	0	106.17	5.04254e+07	3.91881e+07	286.35		200.445
000106-44-5	7	8	0	1	0	108.14	639305	720671	308.65		216.055
000106-49-0	7	9	1	0	0	107.16	1.64824e+06	8118.85	316.85		221.795
000106-51-4	6	4	0	2	0	108.1	523068	148784	388.85		272.195
000106-55-8	6	14	2	0	0	114.19	1.62289e+07	1.69319e+06	389.15		272.405
000106-63-8	7	12	0	2	0	128.17	5.55872e+07	6.29575e+07	212.15		148.505
000106-65-0	6	10	0	4	0	146.14	3.22128e+06	3.39413e+06	292.15		204.505
000106-67-2	8	18	0	1	0	130.23	1.658e+06	2.13371e+06
000106-68-3	8	16	0	1	0	128.22	1.37763e+07	1.61182e+07
000106-70-7	7	14	0	2	0	130.19	2.60095e+07	2.86826e+07	202.15		141.505
000106-88-7	4	8	0	1	0	72.108	6.97423e+08	7.16796e+08	123.15		86.205
000106-97-8	4	10	0	0	0	58.124	5.68992e+09	5.64935e+09	134.95		94.465
000106-98-9	4	8	0	0	0	56.108	6.78051e+09	5.60522e+09	87.85		61.495
000106-99-0	4	6	0	0	0	54.092	6.1228e+09	5.95716e+09	164.25		114.975
000107-00-6	4	6	0	0	0	54.092	4.10899e+09	3.98113e+09	147.45		103.215
000107-01-7	4	8	0	0	0	56.108	4.09844e+09	5.21346e+09	133.85		93.695
000107-02-8	3	4	0	1	0	56.065	8.26016e+08	7.95579e+08	185.45		129.815
000107-10-8	3	9	1	0	0	59.112	9.8425e+08	9.87425e+08	190.15		133.105
000107-11-9	3	7	1	0	0	57.096	7.42304e+08	7.88315e+08	184.95		129.465
000107-12-0	3	5	1	0	0	55.08	1.40262e+08	1.25493e+08	180.35		126.245
000107-13-1	3	3	1	0	0	53.064	3.09455e+08	2.78081e+08	189.65		132.755
000107-15-3	2	8	2	0	0	60.099	3.87457e+07	5.77957e+07	284.25		198.975
000107-18-6	3	6	0	1	0	58.081	8.14629e+07	7.30357e+07	144.15		100.905
000107-19-7	3	4	0	1	0	56.065	4.70115e+07	2.96233e+07	221.35		154.945
000107-21-1	2	6	0	2	0	62.069	306952	203189	260.15		182.105
000107-22-2	2	2	0	2	0	58.037	7.95902e+08	8.98901e+08	288.15		201.705
000107-25-5	3	6	0	1	0	58.081	4.10748e+09	4.61935e+09	151.15		105.805
000107-31-3	2	4	0	2	0	60.053	1.89112e+09	1.91146e+09	174.15		121.905
000107-39-1	8	16	0	0	0	112.22	2.69412e+08	2.49523e+08	179.65		125.755
000107-40-4	8	16	0	0	0	112.22	2.16373e+08	2.12757e+08	166.85		116.795
000107-41-5	6	14	0	2	0	118.18	82550	370205	223.15		156.205
000107-70-0	7	14	0	2	0	130.19	1.53907e+07	2.30161e+07
000107-83-5	6	14	0	0	0	86.178	9.765e+08	9.62617e+08	119.45		83.615
000107-87-9	5	10	0	1	0	86.135	1.6383e+08	1.82342e+08	196.25		137.375
000107-88-0	4	10	0	2	0	90.123	97348.7	155467
000107-92-6	4	8	0	2	0	88.107	7.81373e+06	9.9921e+06	267.45		187.215
000107-93-7	4	6	0	2	0	86.091	1.17365e+06	1.14774e+06	345.15		241.605
000107-96-0	3	6	0	2	1	106.14	284299	884156	291.15		203.805
000107-98-2	4	10	0	2	0	90.123	6.05402e+07	3.5743e+07	178.15		124.705
000108-01-0	4	11	1	1	0	89.138	1.52303e+07	1.57092e+07	214.15		149.905
000108-03-2	3	7	1	2	0	89.095	4.8373e+07	4.55951e+07	165.15		115.605
000108-05-4	4	6	0	2	0	86.091	4.17257e+08	5.50728e+08	179.95		125.965
000108-08-7	7	16	0	0	0	100.21	4.2728e+08	5.11229e+08	153.25		107.275
000108-10-1	6	12	0	1	0	100.16	1.06874e+08	1.17314e+08	189.15		132.405
000108-11-2	6	14	0	1	0	102.18	2.90916e+07	2.05288e+07	183.15		128.205
000108-18-9	6	15	1	0	0	101.19	4.31552e+08	3.58178e+06	212.15		148.505
000108-20-3	6	14	0	1	0	102.18	8.17858e+08	8.28836e+08	186.35		130.445
000108-21-4	5	10	0	2	0	102.13	3.3137e+08	3.3373e+08	199.75		139.825
000108-24-7	4	6	0	3	0	102.09	2.79938e+07	3.56784e+07	200.15		140.105
000108-30-5	4	4	0	3	0	100.07	8072.03	9525	392.15		274.505
000108-31-6	4	2	0	3	0	98.059	1.31843e+06	875439	325.95		228.165
000108-32-7	4	6	0	3	0	102.09	247004	228891	224.35		157.045
000108-38-3	8	10	0	0	0	106.17	4.72881e+07	3.7762e+07	225.35		157.745
000108-39-4	7	8	0	1	0	108.14	639305	970581	284.95		199.465
000108-44-1	7	9	1	0	0	107.16	1.74469e+06	1.76196e+06	241.95		169.365
000108-45-2	6	8	2	0	0	108.14	12146.8	10926.3	336.65		235.655
000108-46-3	6	6	0	2	0	110.11	2894.63	710.339	384.15		268.905
000108-47-4	7	9	1	0	0	107.16	1.82248e+07	1.55467e+07	209.15		146.405
000108-48-5	7	9	1	0	0	107.16	3.25439e+07	3.03449e+07	267.05		186.935
000108-55-4	5	6	0	3	0	114.1	18404.2	12208.1	329.45		230.615
000108-57-6	10	10	0	0	0	130.19	4.05055e+06	4.63819e+06	220.85		154.595
000108-59-8	5	8	0	4	0	132.12	6.39305e+06	6.40726e+06	211.25		147.875
000108-64-5	7	14	0	2	0	130.19	5.80648e+07	5.58262e+07	173.85		121.695
000108-65-6	6	12	0	3	0	132.16	2.78552e+07	3.58721e+07
000108-67-8	9	12	0	0	0	120.2	1.60149e+07	1.29798e+07	228.45		159.915
000108-68-9	8	10	0	1	0	122.17	265893	151657	336.75		235.725
000108-75-8	8	11	1	0	0	121.18	1.29356e+07	9.89739e+06	227.15		159.005
000108-78-1	3	6	6	0	0	126.12	0.0024342	0.605499	618.15		432.705
000108-82-7	9	20	0	1	0	144.26	2.34799e+06	2.58822e+06
000108-83-8	9	18	0	1	0	142.24	1.26085e+07	1.64293e+07	231.65		162.155
000108-84-9	8	16	0	2	0	144.22	3.09966e+07	3.48712e+07	209.15		146.405
000108-87-2	7	14	0	0	0	98.19	2.42591e+08	2.19387e+08	146.55		102.585
000108-88-3	7	8	0	0	0	92.142	1.40604e+08	1.17335e+08	178.25		124.775
000108-89-4	6	7	1	0	0	93.129	2.88769e+07	2.49232e+07	276.81		193.767
000108-91-8	6	13	1	0	0	99.177	5.38082e+07	4.4485e+07	255.45		178.815
000108-93-0	6	12	0	1	0	100.16	4.30508e+06	3.49788e+06	298.55		208.985
000108-94-1	6	10	0	1	0	98.146	2.28352e+07	2.13059e+07	242.15		169.505
000108-95-2	6	6	0	1	0	94.114	1.77047e+06	1.63389e+06	314.05		219.835
000108-99-6	6	7	1	0	0	93.129	3.02782e+07	2.63746e+07	255.05		178.535
000109-05-7	6	13	1	0	0	99.177	1.02859e+08	8.31096e+07
000109-06-8	6	7	1	0	0	93.129	5.60522e+07	5.1548e+07	206.45		144.515
000109-08-0	5	6	2	0	0	94.117	4.07531e+07	3.68763e+07	244.15		170.905
000109-21-7	8	16	0	2	0	144.22	1.4026e+07	1.36385e+07	181.65		127.155
000109-43-3	18	34	0	4	0	314.47	79.249	3007.75	263.15		184.205
000109-49-9	6	10	0	1	0	98.146	5.53741e+07	6.59216e+07
000109-52-4	5	10	0	2	0	102.13	1.07584e+06	3.9356e+06	239.15		167.405
000109-53-5	6	12	0	1	0	100.16	3.20191e+08	4.61182e+08	161.15		112.805
000109-55-7	5	14	2	0	0	102.18	5.48898e+07	4.79737e+07	213.15		149.205
000109-60-4	5	10	0	2	0	102.13	1.97054e+08	1.92663e+08	180.15		126.105
000109-66-0	5	12	0	0	0	72.151	1.99153e+09	1.98766e+09	143.45		100.415
000109-67-1	5	10	0	0	0	70.135	2.39081e+09	2.00402e+09	107.95		75.565
000109-68-2	5	10	0	0	0	70.135	1.98895e+09	1.90984e+09
000109-73-9	4	11	1	0	0	73.139	3.64947e+08	3.72018e+08	223.15		156.205
000109-74-0	4	7	1	0	0	69.107	7.24061e+07	6.46085e+07	161.25		112.875
000109-75-1	4	5	1	0	0	67.091	6.66298e+07	5.91303e+07	186.15		130.305
000109-77-3	3	2	2	0	0	66.063	711759	404893	305.15		213.605
000109-78-4	3	5	1	1	0	71.079	306425	77943.5	227.15		159.005
000109-79-5	4	10	0	0	1	90.188	2.20463e+08	1.93244e+08	157.45
000109-83-1	3	9	1	1	0	75.111	4.371e+06	3.47501e+06	268.65		188.055
000109-86-4	3	8	0	2	0	76.096	3.88534e+07	2.29439e+07	188.05		131.635
000109-87-5	3	8	0	2	0	76.096	1.62571e+09	1.68501e+09	168.35		117.845
000109-89-7	4	11	1	0	0	73.139	9.32639e+08	9.271e+08	223.15		156.205
000109-92-2	4	8	0	1	0	72.108	1.97991e+09	2.02253e+09	157.35		110.145
000109-93-3	4	6	0	1	0	70.092	2.52386e+09	2.54646e+09	172.15		120.505
000109-94-4	3	6	0	1	0	74.08	7.63442e+08	7.67812e+08	193.55		135.485
000109-97-7	4	5	1	0	0	67.091	3.0142e+07	3.64156e+07	249.75		174.825
000109-99-9	4	8	0	1	0	72.108	6.28456e+08	6.70301e+08	164.85		115.395
000110-00-9	4	4	0	1	0	68.076	2.19559e+09	2.18096e+09	187.55		131.285
000110-01-0	4	8	0	0	1	88.172	8.71349e+07	7.10339e+07	177.05
000110-02-1	4	4	0	0	1	84.14	3.60135e+08	3.33601e+08	233.75
000110-05-4	8	18	0	2	0	146.23	1.97205e+08	2.15276e+08	233.15		163.205
000110-12-3	7	14	0	1	0	114.19	3.53975e+07	4.10414e+07	199.15		139.405
000110-15-6	4	6	0	4	0	118.09	1.21285	685.8	461.15		322.805
000110-19-0	6	12	0	2	0	116.16	1.11289e+08	1.14235e+08	174.35		122.045
000110-27-0	17	34	0	2	0	270.46	1358.52	11798.1	276.15		193.305
000110-33-8	18	34	0	4	0	314.47	48.6647	3007.75	263.15		184.205
000110-40-7	14	26	0	4	0	258.36	7053.02	20825.8	278.15		194.705
000110-42-9	11	22	0	2	0	186.3	370345	1.071e+06	255.15		178.605
000110-43-0	7	14	0	1	0	114.19	2.36494e+07	3.01216e+07	238.15		166.705
000110-45-2	6	12	0	2	0	116.16	9.55083e+07	8.36478e+07	179.65		125.755
000110-49-6	5	10	0	3	0	118.13	1.27e+07	3.5179e+07	203.15		142.205
000110-54-3	6	14	0	0	0	86.178	7.00211e+08	6.94195e+08	177.85		124.495
000110-58-7	5	13	1	0	0	87.166	1.40683e+08	1.45603e+08	218.15		152.705
000110-59-8	5	9	1	0	0	83.134	3.26056e+07	2.67545e+07	176.95		123.865
000110-61-2	4	4	2	0	0	80.09	33493.5	26777.6	327.65		229.355
000110-62-3	5	10	0	1	0	86.135	1.20327e+08	1.5226e+08	181.65		127.155
000110-63-4	4	10	0	2	0	90.123	50853.8	26347.1	293.55		205.485
000110-65-6	4	6	0	2	0	86.091	2573.15	11477.4	323.15		226.205
000110-66-7	5	12	0	0	1	104.22	7.72332e+07	6.54803e+07	197.45
000110-71-4	4	10	0	2	0	90.123	2.32474e+08	3.83583e+08	215.15		150.605
000110-74-7	4	8	0	2	0	88.107	3.91018e+08	3.9779e+08	180.25		126.175
000110-80-5	4	10	0	2	0	90.123	2.57175e+07	1.5014e+07	203.15		142.205
000110-81-6	4	10	0	0	2	122.25	2.80993e+07	2.1731e+07	171.65
000110-82-7	6	12	0	0	0	84.163	4.3784e+08	4.2446e+08	279.75		195.825
000110-83-8	6	10	0	0	0	82.147	3.92731e+08	3.79934e+08	169.65		118.755
000110-85-0	4	10	2	0	0	86.138	740474	3.29511e+06	379.15		265.405
000110-86-1	5	5	1	0	0	79.102	8.84264e+07	8.20495e+07	231.55		162.085
000110-88-3	3	6	0	3	0	90.079	8.48387e+07	5.08538e+07	333.35		233.345
000110-89-4	5	11	1	0	0	85.15	1.46899e+08	1.32193e+08	266.15		186.305
000110-91-8	4	9	1	1	0	87.122	4.71923e+07	5.10314e+07	268.25		187.775
000110-94-1	5	8	0	4	0	132.12	20.4222	2322.81	370.95		259.665
000110-96-3	8	19	1	0	0	129.25	5.04673e+07	4.49144e+07	199.65		139.755
000110-97-4	6	15	1	2	0	133.19	892.503	9304.36	317.65		222.355
000111-11-5	9	18	0	2	0	158.24	4.59477e+06	4.3618e+06	233.15		163.205
000111-13-7	8	16	0	1	0	128.22	9.29898e+06	1.28808e+07	257.15		180.005
000111-14-8	7	14	0	2	0	130.19	74854.6	818504	265.65		185.955
000111-15-9	6	12	0	3	0	132.16	1.66219e+07	2.10971e+07	211.45		148.015
000111-16-0	7	12	0	4	0	160.17	0.774915	283.274	379.15		265.405
000111-20-6	10	18	0	4	0	202.25	0.603304	72.179	403.95		282.765
000111-26-2	6	15	1	0	0	101.19	4.88622e+07	4.79382e+07	250.25		175.175
000111-27-3	6	14	0	1	0	102.18	5.09377e+06	4.83579e+06	228.55		159.985
000111-29-5	5	12	0	2	0	104.15	21826.8	23393.8	255.15		178.605
000111-30-8	5	8	0	2	0	100.12	3.22881e+06	1.01169e+07
000111-31-9	6	14	0	0	1	118.24	2.66827e+07	2.43205e+07	192.15
000111-34-2	6	12	0	1	0	100.16	2.64224e+08	2.96513e+08	181.15		126.805
000111-36-4	5	9	1	1	0	99.134	9.37647e+07	1.03887e+08
000111-40-0	4	13	3	0	0	103.17	1.28427e+06	1.40787e+06	234.15		163.905
000111-41-1	4	12	2	1	0	104.15	45836.2	36825.7	235.15		164.605
000111-42-2	4	11	1	2	0	105.14	1582.12	3062.53	301.15		210.805
000111-43-3	6	14	0	1	0	102.18	3.43061e+08	3.55686e+08	151.15		105.805
000111-46-6	4	10	0	3	0	106.12	32514.1	15173.3	262.75		183.925
000111-47-7	6	14	0	0	1	118.24	4.09765e+07	3.53695e+07	170.65
000111-48-8	4	10	0	2	1	122.19	21205.8	1588.79	262.95		184.065
000111-49-9	6	13	1	0	0	99.177	4.30998e+07	3.70797e+07
000111-55-7	6	10	0	4	0	146.14	608115	4.65121e+06	242.15		169.505
000111-61-5	20	40	0	2	0	312.54	43.4856	1052.72	306.15		214.305
000111-65-9	8	18	0	0	0	114.23	8.62054e+07	9.07942e+07	216.35		151.445
000111-66-0	8	16	0	0	0	112.22	1.04992e+08	9.94474e+07	171.45		120.015
000111-67-1	8	16	0	0	0	112.22	9.84951e+07	9.16122e+07	193.15		135.205
000111-68-2	7	17	1	0	0	115.22	1.69566e+07	1.87513e+07	255.15		178.605
000111-69-3	6	8	2	0	0	108.14	3946.25	14762.1	274.15		191.905
000111-70-6	7	16	0	1	0	116.2	1.3496e+06	1.86647e+06	239.15		167.405
000111-71-7	7	14	0	1	0	114.19	2.15943e+07	2.15943e+07	229.85		160.895
000111-76-2	6	14	0	2	0	118.18	5.588e+06	3.01625e+06	198.35		138.845
000111-77-3	5	12	0	3	0	120.15	1.61441e+06	723254
000111-78-4	8	12	0	0	0	108.18	2.87803e+07	2.88268e+07	216.75		151.725
000111-82-0	13	26	0	2	0	214.35	47331.2	125525	278.35		194.845
000111-84-2	9	20	0	0	0	128.26	3.06522e+07	3.41651e+07	219.65		153.755
000111-86-4	8	19	1	0	0	129.25	6.72675e+06	6.83088e+06	273.15		191.205
000111-87-5	8	18	0	1	0	130.23	555463	692580	257.65		180.355
000111-88-6	8	18	0	0	1	146.3	3.3352e+06	2.962e+06	223.95
000111-90-0	6	14	0	3	0	134.18	908588	676393	197.15		138.005
000111-92-2	8	19	1	0	0	129.25	1.79588e+07	1.77714e+07	211.15		147.805
000111-96-6	6	14	0	3	0	134.18	2.13446e+07	2.17052e+07	205.15		143.605
000112-05-0	9	18	0	2	0	158.24	14029.2	181954	285.45		199.815
000112-07-2	8	16	0	3	0	160.21	3.22881e+06	4.62366e+06	210.15		147.105
000112-10-7	21	42	0	2	0	326.57	696.466	947.334	301.15		210.805
000112-12-9	11	22	0	1	0	170.3	378740	1.02461e+06	288.15		201.705
000112-15-2	8	16	0	4	0	176.21	936700	1.34491e+06	248.15		173.705
000112-20-9	9	21	1	0	0	143.27	2.1393e+06	2.48559e+06	272.15		190.505
000112-24-3	6	18	4	0	0	146.24	3237.78	87995.9	285.15		199.605
000112-25-4	8	18	0	2	0	146.23	1.2178e+06	356698	228.05		159.635
000112-27-6	6	14	0	4	0	150.18	10655.1	1606.33	266.15		186.305
000112-30-1	10	22	0	1	0	158.29	72356.6	92677.7	280.05		196.035
000112-31-2	10	20	0	1	0	156.27	864676	1.9728e+06	268.15		187.705
000112-34-5	8	18	0	3	0	162.23	190920	95023.9	205.15		143.605
000112-36-7	8	18	0	3	0	162.23	4.53761e+06	7.94191e+06	228.15		159.705
000112-37-8	11	22	0	2	0	186.3	38125.5	52148.5	301.75		211.225
000112-38-9	11	20	0	2	0	184.28	9277.88	69410.9	297.65		208.355
000112-39-0	17	34	2	0	0	270.46	672.777	6799.34	303.15		212.205
000112-40-3	12	26	0	0	0	170.34	1.23502e+06	2.159e+06	263.55		184.485
000112-41-4	12	24	0	0	0	168.33	1.44108e+06	2.41386e+06	237.95		166.565
000112-42-5	11	24	0	1	0	172.31	27471.6	47205.2	292.15		204.505
000112-48-1	10	22	0	2	0	174.29	842720	4.13869e+06	204.05		142.835
000112-49-2	8	18	0	4	0	178.23	386313	2.29891e+06	228.15		159.705
000112-50-5	8	18	0	4	0	178.23	95788.1	21456.5	254.45		178.115
000112-51-6	10	22	0	0	2	206.41	70393.5	88019.6
000112-53-8	12	26	0	1	0	186.34	8487.9	18116.9	297.15		208.005
000112-54-9	12	24	0	1	0	184.32	151496	152486	317.65		222.355
000112-55-0	12	26	0	0	1	202.41	92669.6	80549.2	265.15
000112-57-2	8	23	5	0	0	189.31	8.13661	2135.86	243.15		170.205
000112-58-3	12	26	0	1	0	186.34	461430	1.70158e+06
000112-59-4	10	22	0	3	0	190.29	12065	17381.8	233.15		163.205
000112-60-7	8	18	0	5	0	194.23	485.452	116.926	266.95		186.865
000112-61-8	19	38	0	2	0	298.51	217.294	525.995	312.25		218.575
000112-62-9	19	36	0	2	0	296.5	100.192	1831.81	253.25		177.275
000112-63-0	19	34	0	2	0	294.48	58.0637	1493.52	238.15		166.705
000112-70-9	13	28	0	1	0	200.37	4692.54	2550.76	305.65		213.955
000112-72-1	14	30	0	1	0	214.39	1266.77	2314.74	312.65		218.855
000112-73-2	12	26	0	3	0	218.34	305719	381269	213.15		149.205
000112-80-1	18	34	0	2	0	282.47	21.2456	778.499	318.15		222.705
000112-88-9	18	36	0	0	0	252.49	915.368	35394.2	290.65		203.455
000112-92-5	18	38	0	1	0	270.5	39.2301	26.5893	332.65		232.855
000112-95-8	20	42	0	0	0	282.56	70.0953	4704.38	309.95		216.965
000113-48-4	17	25	1	2	0	275.39	266.377	10.8623	253.15		177.205
000114-26-1	11	15	1	3	0	209.25	108.871	9548.73	360.15		252.105
000115-07-1	3	6	0	0	0	42.081	1.96409e+10	1.59116e+10	88.15		61.705
000115-10-6	2	6	0	1	0	46.07	1.10156e+10	9.53038e+09	131.65		92.155
000115-11-7	4	8	0	0	0	56.108	6.95529e+09	6.72023e+09	132.75		92.925
000115-19-5	5	8	0	1	0	84.119	7.23028e+07	7.36815e+07	276.15		193.305
000115-22-0	5	10	0	2	0	102.13	3.39823e+07	1.25698e+07
000115-84-4	9	20	0	2	0	160.26	861.017	5209.15	316.95		221.865
000115-95-7	12	20	0	2	0	196.29	1.17077e+06	1.38172e+06
000116-06-3	7	14	2	2	1	190.27	354.793	49384.7	372.15		260.505
000116-11-0	4	8	0	1	0	72.108	2.00335e+09	2.06127e+09
000116-53-0	5	10	0	2	0	102.13	2.6952e+06	6.14766e+06
000116-85-8	14	9	1	3	0	239.23	0.0385843	0.0168485	489.15		342.405
000117-79-3	14	9	1	2	0	223.23	0.000600021	0.0528018	577.65		404.355
000117-81-7	24	38	0	4	0	390.57	2.98019	426.042	218.15		152.705
000117-84-0	24	38	0	4	0	390.57	2.09873	30.4316	298.15		208.705
000118-61-6	9	10	0	3	0	166.18	756093	277818	274.15		191.905
000118-90-1	8	8	0	2	0	136.15	4808.35	20858.1	376.85		263.795
000118-96-7	7	5	3	6	0	227.13	97.9697	210.11	353.25		247.275
000119-15-3	12	9	3	5	0	275.22	5.91949e-05	0.0411405	467.15		327.005
000119-36-8	8	8	0	3	0	152.15	280562	436794	265.15		185.605
000119-38-0	10	17	3	2	0	211.27	11354.7	14420.4
000119-53-9	14	12	0	2	0	212.25	25.0986	6.58269	410.15		287.105
000119-61-9	13	10	0	1	0	182.22	18902.5	8873.42	320.95		224.665
000119-64-2	10	12	0	0	0	132.21	2.61405e+06	1.74743e+06	237.45		166.215
000119-65-3	9	7	1	0	0	129.16	485728	254075	299.62		209.734
000119-75-5	12	10	2	2	0	214.23	115.161	568.895	348.15		243.705
000120-12-7	14	10	0	0	0	178.24	62.5496	20.786	488.15		341.705
000120-51-4	14	12	0	2	0	212.25	2555.5	6331.7	294.15		205.905
000120-57-0	8	6	0	3	0	150.14	80720.3	85563.5	310.15		217.105
000120-61-6	10	10	0	4	0	194.19	104398	2589.08	414.15		289.905
000120-72-9	8	7	1	0	0	117.15	76813.4	76183.8	325.65		227.955
000120-80-9	6	6	0	2	0	110.11	21665.3	6570.63	378.15		264.705
000120-92-3	5	8	0	1	0	84.119	5.15318e+07	5.4244e+07	221.85		155.295
000120-94-5	5	11	1	0	0	85.15	4.57415e+08	3.82399e+08
000121-14-2	7	6	2	4	0	182.14	1439.73	7041.93	344.15		240.905
000121-21-1	21	28	0	3	0	328.46	358.312	9.14314
000121-29-9	22	28	0	5	0	372.47	7.96742	4.12384
000121-32-4	9	10	0	3	0	166.18	92.6357	2617.38	350.65		245.455
000121-33-5	8	8	0	3	0	152.15	966.836	3656.31	354.65		248.255
000121-44-8	6	15	1	0	0	101.19	3.10185e+08	3.21218e+08	158.45		110.915
000121-69-7	8	11	1	0	0	121.18	4.55801e+06	3.25572e+06	275.65		192.955
000121-82-4	3	6	6	6	0	222.12	0.0489811	16.0085	478.65		335.055
000122-39-4	12	11	1	0	0	169.23	6093.31	8830.75	326.05		228.235
000122-42-9	10	13	1	2	0	179.22	1348.57	45658.6	360.45		252.315
000122-51-0	7	16	0	3	0	148.2	3.07585e+07	5.56712e+07
000122-57-6	10	10	0	1	0	146.19	97424	78567.8	314.65		220.255
000122-60-1	9	10	0	2	0	150.18	80720.3	286557	276.65		193.655
000122-66-7	12	12	2	0	0	184.24	4317.14	1039.68	404.15		282.905
000122-78-1	8	8	0	1	0	120.15	2.53139e+06	2.286e+06	306.65		214.655
000122-79-2	8	8	0	2	0	136.15	2.91575e+06	3.2202e+06	243.15		170.205
000122-97-4	9	12	0	1	0	136.2	145421	62062.1
000122-98-5	8	11	1	1	0	137.18	16271	3457.68	284.15		198.905
000122-99-6	8	10	0	2	0	138.17	51983.9	33343.9	287.15		201.005
000123-01-3	18	30	0	0	0	246.44	676.468	5771.82	276.15		193.305
000123-02-4	19	32	0	0	0	260.46	177.692	2294.61	283.15		198.205
000123-05-7	8	16	0	1	0	128.22	1.23986e+07	1.50161e+07
000123-07-9	8	10	0	1	0	122.17	244227	280993	318.15		222.705
000123-08-0	7	6	0	2	0	122.12	739.904	296.093	390.15		273.105
000123-11-5	8	8	0	2	0	136.15	240783	221755	273.15		191.205
000123-19-3	7	14	0	1	0	114.19	3.75446e+07	4.10414e+07	240.15		168.105
000123-25-1	8	14	0	4	0	174.2	411060	1.37644e+06	252.15		176.505
000123-30-8	6	7	1	1	0	109.13	234.627	191.808	460.65		322.455
000123-31-9	6	6	0	2	0	110.11	142.068	97.0796	445.45		311.815
000123-35-3	10	16	0	0	0	136.24	1.47368e+07	1.75647e+07
000123-38-6	3	6	0	1	0	58.081	9.88792e+08	9.89416e+08	193.15		135.205
000123-39-7	2	5	1	1	0	59.068	803275	1.17475e+06	269.35		188.545
000123-42-2	6	12	0	2	0	116.16	1.06745e+07	3.05252e+06	229.15		160.405
000123-51-3	5	12	0	1	0	88.151	1.12234e+07	1.81847e+07	155.95		109.165
000123-54-6	5	8	0	2	0	100.12	1.59288e+07	4.6764e+07	250.15		175.105
000123-56-8	4	5	1	2	0	99.09	399.566	1907.26	399.65		279.755
000123-62-6	6	10	0	3	0	130.14	9.51423e+06	1.09134e+07	228.15		159.705
000123-63-7	6	12	0	3	0	132.16	7.83504e+07	1.11523e+08	285.75		200.025
000123-72-8	4	8	0	1	0	72.108	4.31628e+08	4.18454e+08	174.15		121.905
000123-73-9	4	6	0	1	0	70.092	1.13008e+08	1.18659e+08	196.65		137.655
000123-75-1	4	9	1	0	0	71.123	2.39524e+08	2.54081e+08	215.35		150.745
000123-76-2	5	8	0	3	0	116.12	6991.46	177283	306.15		214.305
000123-77-3	2	4	4	2	0	116.08	0.00117357	63.6722	485.15		339.605
000123-79-5	22	42	0	4	0	370.58	16.9244	242.914	203.15		142.205
000123-86-4	6	12	0	2	0	116.16	7.18497e+07	7.42842e+07	195.15		136.605
000123-91-1	4	8	0	2	0	88.107	1.80379e+08	1.92265e+08	284.95		199.465
000123-92-2	7	14	0	2	0	130.19	3.91763e+07	3.9666e+07	194.65		136.255
000123-96-6	8	18	0	1	0	130.23	1.69297e+06	1.69297e+06	311.75		218.225
000123-99-9	9	16	0	4	0	188.23	0.108352	231.678	379.65		265.755
000124-02-7	6	11	1	0	0	97.161	1.05442e+08	1.21624e+08	184.75		129.325
000124-04-9	6	10	0	4	0	146.14	2.49846	100.567	426.35		298.445
000124-07-2	8	16	0	2	0	144.22	28749.3	378159	289.45		202.615
000124-09-4	6	16	2	0	0	116.21	736600	1.14235e+06	314.65		220.255
000124-10-7	15	30	0	2	0	242.41	6377.3	33078.1	292.15		204.505
000124-11-8	9	18	0	0	0	126.24	3.66147e+07	3.99372e+07	191.85		134.295
000124-12-9	8	15	1	0	0	125.22	2.62341e+06	1.87002e+06	227.55		159.285
000124-13-0	8	16	0	1	0	128.22	8.128e+06	1.02633e+07	250.15		175.105
000124-17-4	10	20	0	4	0	204.27	439118	389718	241.15		168.805
000124-18-5	10	22	0	0	0	142.29	1.09274e+07	1.32198e+07	243.45		170.415
000124-19-6	9	18	0	1	0	142.24	2.82736e+06	4.30982e+06
000124-22-1	12	27	1	0	0	185.36	80141.8	63516.1	301.45		211.015
000124-38-9	1	0	0	2	0	44.01	1.14317e+11	4.21468e+10	216.65
000124-40-3	2	7	1	0	0	45.085	3.68085e+09	3.55977e+09	180.95		126.665
000124-68-5	4	11	1	1	0	89.138	4.78941e+06	2.37076e+06	298.65		209.055
000126-98-7	4	5	1	0	0	67.091	2.56712e+08	2.04072e+08	237.35		166.145
000127-17-3	3	4	0	3	0	88.064	6.11365e+06	3.28176e+06	286.95		200.865
000127-19-5	4	9	1	1	0	87.122	9.36356e+06	9.26992e+06	253.15		177.205
000127-41-3	13	20	0	1	0	192.3	178747	281036
000127-91-3	10	16	0	0	0	136.24	2.14436e+07	1.83698e+07	211.65		148.155
000128-37-0	15	24	0	1	0	220.36	61089.1	20955	344.15		240.905
000128-95-0	14	10	2	2	0	238.25	0.00256152	0.0144726	541.15		378.805
000129-00-0	16	10	0	0	0	202.26	48.9165	3.7394	424.35		297.045
000129-43-1	14	8	0	3	0	224.22	2.52295	0.391763	466.95		326.865
000131-11-3	10	10	0	4	0	194.19	32154.7	48232	278.65		195.055
000131-16-8	14	18	0	4	0	250.3	1775.85	10318.7
000132-64-9	12	8	0	1	0	168.2	22420.9	9013.55	359.65		251.755
000134-20-3	8	9	1	2	0	151.17	220210	160079	297.65		208.355
000134-32-7	10	9	1	0	0	143.19	32158.8	8618.78	322.35		225.645
000134-62-3	12	17	1	1	0	191.28	20556.8	34021.5	228.15		159.705
000134-81-6	14	10	0	2	0	210.23	2339.27	370.668	367.95		257.565
000135-01-3	10	14	0	0	0	134.22	7.57157e+06	5.73276e+06	241.95		169.365
000135-19-3	10	8	0	1	0	144.17	2479.73	1270.86	396.15		277.305
000135-98-8	10	14	0	0	0	134.22	1.26337e+07	9.51854e+06	190.45		133.315
000136-35-6	12	11	3	0	0	197.24	202.166	257.611	371.15		259.805
000136-60-7	11	14	0	2	0	178.23	95788.1	256712	250.75		175.525
000137-17-7	9	13	1	0	0	135.21	65383.5	168544	341.15		238.805
000137-32-6	5	12	0	1	0	88.151	1.4775e+07	2.14996e+07
000138-22-7	7	14	0	3	0	146.19	3.14271e+06	1.33565e+06	245.15		171.605
000138-86-3	10	16	0	0	0	136.24	1.13293e+07	1.0612e+07	178.15		124.705
000140-10-3	9	8	0	2	0	148.16	164.226	1282.27	406.15		284.305
000140-11-4	9	10	0	2	0	150.18	1.42875e+06	1.50947e+06	221.85		155.295
000140-29-4	8	7	1	0	0	117.15	562879	409882	249.35		174.545
000140-66-9	14	22	0	1	0	206.33	5298.91	5742.34	357.65		250.355
000140-76-1	8	9	1	0	0	119.17	7.5565e+06	5.89151e+06
000140-88-5	5	8	0	2	0	100.12	2.0772e+08	2.06644e+08	201.95		141.365
000141-05-9	8	12	0	4	0	172.18	971873	1.64756e+06	264.35		185.045
000141-28-6	10	18	0	4	0	202.25	627218	385897	253.35		177.345
000141-32-2	7	12	0	2	0	128.17	3.7561e+07	3.47851e+07	208.55		145.985
000141-43-5	2	7	1	1	0	61.084	1.32618e+06	1.34259e+06	283.65		198.555
000141-78-6	4	8	0	2	0	88.107	4.41357e+08	4.65509e+08	189.55		132.685
000141-79-7	6	10	0	1	0	98.146	4.32973e+07	6.48668e+07	214.15		149.905
000141-82-2	3	4	0	4	0	104.06	8394.91	5652.57	408.15		285.705
000141-93-5	10	14	0	0	0	134.22	8.14845e+06	6.59808e+06	189.25		132.475
000141-97-9	6	10	0	3	0	130.14	5.45669e+06	6.49906e+06	228.15		159.705
000142-29-0	5	8	0	0	0	68.12	1.39233e+09	1.39054e+09	138.05		96.635
000142-62-1	6	12	0	2	0	116.16	271543	1.73538e+06	270.15		189.105
000142-68-7	5	10	0	1	0	86.135	3.31024e+08	3.24883e+08	228.15		159.705
000142-82-5	7	16	0	0	0	100.21	2.47542e+08	2.47004e+08	182.55		127.785
000142-84-7	6	15	1	0	0	101.19	1.09111e+08	1.35879e+08	210.15		147.105
000142-91-6	19	38	0	2	0	298.51	896.276	3287.47	286.65		200.655
000142-92-7	8	16	0	2	0	144.22	1.02521e+07	1.12363e+07	192.25		134.575
000142-96-1	8	18	0	1	0	130.23	4.20445e+07	5.37974e+07	177.95		124.565
000143-07-7	12	24	0	2	0	200.32	172.419	15175.4	316.35		221.445
000143-08-8	9	20	0	1	0	144.26	175906	254172	268.15		187.705
000143-22-6	10	22	0	4	0	206.28	27714	5742.34	243.15		170.205
000143-27-1	16	35	1	0	0	241.46	1724.89	4811.52	319.95		223.965
000144-19-4	8	18	0	2	0	146.23	35355.5	27655.9	324.65		227.255
000144-62-7	2	2	0	4	0	90.036	1133.31	27122	462.65		323.855
000145-73-3	8	10	0	5	0	186.17	0.00157146	82.9772	417.15		292.005
000148-24-3	9	7	1	1	0	145.16	12952.9	234.089	348.65		244.055
000149-57-5	8	16	0	2	0	144.22	232474	485097
000150-19-6	7	8	0	2	0	124.14	130788	107433
000151-18-8	3	6	2	0	0	70.095	3.23958e+06	68558.4
000151-56-4	2	5	1	0	0	43.069	4.92878e+08	5.3453e+08	195.25		136.675
000156-43-4	8	11	1	1	0	137.18	77115.9	162194	275.55		192.885
000156-87-6	3	9	1	1	0	75.111	311177	629618	284.15		198.905
000157-40-4	5	8	0	0	0	68.12	1.67487e+09	1.68329e+09	138.55		96.985
000185-94-4	5	8	0	0	0	68.12	1.31736e+09	1.32467e+09
000187-26-8	7	10	0	0	0	94.158	1.89187e+08	1.78058e+08
000191-07-1	24	12	0	0	0	300.36	3.50326e-05	1.37709e-06	710.45		497.315
000191-24-2	22	12	0	0	0	276.34	0.00148525	0.00145555	551.15		385.805
000192-97-2	20	12	0	0	0	252.32	0.0772978	0.263084	450.65		315.455
000198-55-0	20	12	0	0	0	252.32	0.0711953	0.0181718	547.15		383.005
000205-99-2	20	12	0	0	0	252.32	6.78051	0.337669	441.15		308.805
000206-44-0	16	10	0	0	0	202.26	100.224	34.0241	380.95		266.665
000207-08-9	20	12	0	0	0	252.32	0.0130864	0.0106454	490.15		343.105
000208-96-8	12	8	0	0	0	152.2	54640.1	10224.6	365.65		255.955
000215-58-7	22	14	0	0	0	278.36	0.00149602	0.00122225	479.15		335.405
000217-59-4	18	12	0	0	0	228.3	0.257659	0.365631	472.15		330.505
000218-01-9	18	12	0	0	0	228.3	0.0764389	0.0191404	341.15		238.805
000229-87-8	13	9	1	0	0	179.22	200.262	209.028	380.55		266.385
000230-27-3	13	9	1	0	0	179.22	2103.76	1310.04	367.15		257.005
000238-84-6	17	12	0	0	0	216.29	2.82457	1.38322	462.65		323.855
000243-17-4	17	12	0	0	0	216.29	0.639305	5.13769	485.15		339.605
000260-94-6	13	9	1	0	0	179.22	1300.4	249.485	381.15		266.805
000262-12-4	12	8	0	2	0	184.2	4084.45	2237.78	395.15		276.605
000271-89-6	8	6	0	1	0	118.14	2.794e+06	8.1915e+06
000280-33-1	8	14	0	0	0	110.2	1.97533e+07	6.68902e+07
000280-57-9	6	12	2	0	0	112.18	4.47212e+06	298945	432.15		302.505
000286-08-8	7	12	0	0	0	96.174	1.17787e+08	1.12621e+08
000287-23-0	4	8	0	0	0	56.108	3.54093e+09	3.52586e+09	182.55		127.785
000287-92-3	5	10	0	0	0	70.135	1.19714e+09	1.18282e+09	179.35		125.545
000288-14-2	3	3	1	1	0	69.063	1.68792e+08	1.72289e+08
000288-42-6	3	3	1	1	0	69.063	4.90134e+08	4.9756e+08
000290-37-9	4	4	2	0	0	80.09	4.65207e+07	4.15871e+07	328.15		229.705
000291-64-5	7	14	0	0	0	98.19	1.13913e+08	1.06002e+08	265.15		185.605
000292-64-8	8	16	0	0	0	112.22	3.32094e+07	3.23656e+07	287.95		201.565
000293-96-9	10	20	0	0	0	140.27	4.22124e+06	3.54093e+06	283.15		198.205
000300-62-9	9	13	1	0	0	135.21	1.74356e+06	2.2521e+06
000301-00-8	19	32	0	2	0	292.47	79.6677	487.12
000329-71-5	6	4	2	5	0	184.11	1208.01	153.476	381.15		266.805
000334-48-5	10	20	0	2	0	172.27	3388.6	81267.1	305.05		213.535
000420-04-2	1	2	2	0	0	42.04	8475.63	3.16424e+07	317.15		222.005
000420-05-3	1	1	1	1	0	43.025	1.88004e+09	1.92292e+09	187.15		131.005
000431-03-8	4	6	0	2	0	86.091	2.62989e+08	3.24883e+08	271.95		190.365
000451-40-1	14	12	0	1	0	196.25	1939.68	3343.54	333.15		233.205
000460-12-8	4	2	0	0	0	50.061	3.54335e+09	3.39025e+09	236.75		165.725
000460-19-5	2	2	0	0	0	52.036	6.01915e+09	5.20485e+09	245.25		171.675
000462-18-0	13	26	0	1	0	198.35	71175.9	226953	306.15		214.305
000462-95-3	5	12	0	2	0	104.15	1.90816e+08	3.92882e+08	206.65		144.655
000463-04-7	5	11	1	2	0	117.15	2.49707e+07	1.94552e+08
000463-40-1	18	30	0	2	0	278.44	8.07998	187.002	256.65		179.655
000463-49-0	3	4	0	0	0	40.065	1.16883e+10	1.08273e+10	136.95		95.865
000463-51-4	2	2	0	1	0	42.038	2.3551e+10	1.85334e+10	122.15		85.505
000463-58-1	1	0	0	1	1	60.075	3.03896e+10	2.66054e+10	134.35
000463-82-1	5	12	0	0	0	72.151	4.97883e+09	5.03695e+09	256.75		179.725
000464-06-2	7	16	0	0	0	100.21	5.48898e+08	5.03157e+08	248.15		173.705
000464-49-3	10	16	0	1	0	152.24	588935	87522.3	453.15		317.205
000470-67-7	10	18	0	1	0	154.25	1.6011e+07	1.47514e+07	274.15		191.905
000470-82-6	10	18	0	1	0	154.25	1.57458e+07	1.29282e+07	274.65		192.255
000471-46-5	2	4	2	2	0	88.066	0.30071	0.501973	623.15		436.205
000471-47-6	2	3	1	3	0	89.051	2.22324	189.181	483.15		338.205
000485-31-4	15	18	2	6	0	322.32	5.47564	15.8724	343.15		240.205
000488-23-3	10	14	0	0	0	134.22	2.60101e+06	2.0263e+06	266.95		186.865
000491-35-0	10	9	1	0	0	143.19	49011.6	110043	282.65		197.855
000492-62-6	6	12	0	6	0	180.16	7.76852e-07	1.2883	419.15		293.405
000493-01-6	10	18	0	0	0	138.25	5.83705e+06	6.99554e+06	230.15		161.105
000493-02-7	10	18	0	0	0	138.25	9.06005e+06	6.99554e+06	230.15		161.105
000496-11-7	9	10	0	0	0	118.18	9.31545e+06	6.7945e+06	221.75		155.225
000496-72-0	7	10	2	0	0	122.17	4129.54	19236.2	362.65		253.855
000496-78-6	9	12	0	1	0	136.2	49693.6	79773.2	345.15		241.605
000498-07-7	6	10	0	5	0	162.14	0.653835	3.02507	456.15		319.305
000498-66-8	7	10	0	0	0	94.158	1.98242e+08	1.61365e+08	318.15		222.705
000501-52-0	9	10	0	2	0	150.18	21552.3	7184.11	380.15		266.105
000501-65-5	14	10	0	0	0	178.24	21839.7	8352.72	335.65		234.955
000502-42-1	7	12	0	1	0	112.17	7.5339e+06	8.55851e+06
000502-44-3	6	10	0	2	0	114.15	828190	1.03677e+06	255.15		178.605
000502-49-8	8	14	0	1	0	126.2	2.76645e+06	3.58689e+06	302.15		211.505
000502-56-7	9	18	0	1	0	142.24	4.21812e+06	7.12954e+06	269.35		188.545
000503-17-3	4	6	0	0	0	54.092	2.05159e+09	2.06612e+09	240.85		168.595
000503-29-7	3	7	1	0	0	57.096	5.46974e+08	5.3679e+08
000503-30-0	3	6	0	1	0	58.081	1.01126e+09	1.0456e+09	176.15		123.305
000503-64-0	4	6	0	2	0	86.091	2.72124e+06	1.14774e+06	288.15		201.705
000503-74-2	5	10	0	2	0	102.13	2.41515e+06	6.25744e+06	243.85		170.695
000504-17-6	4	4	2	2	1	144.15	0.154983	0.0391332	508.15		355.705
000504-20-1	9	14	0	1	0	138.21	2.05708e+06	3.73541e+06	301.15		210.805
000504-60-9	5	8	0	0	0	68.12	1.48331e+09	1.50764e+09
000504-63-2	3	8	0	2	0	76.096	180361	84659.5	246.45		172.515
000505-48-6	8	14	0	4	0	174.2	2.6967	98.3173	417.15		292.005
000506-12-7	17	34	0	2	0	270.46	0.905198	412.642	334.45		234.115
000506-30-9	20	40	0	2	0	312.54	0.03044	2434.52	348.55		243.985
000507-70-0	10	18	0	1	0	154.25	416022	3555.25
000509-14-8	1	0	4	8	0	196.03	8.88096e+07	1.25515e+08	286.95
000513-35-9	5	10	0	0	0	70.135	1.76293e+09	1.76293e+09	139.45		97.615
000513-81-5	6	10	0	0	0	82.147	6.68702e+08	6.61907e+08	197.15		138.005
000513-85-9	4	10	0	2	0	90.123	1.1769e+06	833034	298.15		208.705
000519-73-3	19	16	0	0	0	244.34	73.2682	227.158	367.15		257.005
000520-45-6	8	8	0	4	0	168.15	11328	12837.8	382.15		267.505
000526-73-8	9	12	0	0	0	120.2	1.09043e+07	7.55542e+06	247.75		173.425
000526-75-0	8	10	0	1	0	122.17	584307	159536	345.95		242.165
000527-53-7	10	14	0	0	0	134.22	3.58892e+06	2.87719e+06	249.45		174.615
000527-60-6	9	12	0	1	0	136.2	127344	149300	346.15		242.305
000527-84-4	10	14	0	0	0	134.22	1.08165e+07	7.64368e+06	201.65		141.155
000528-29-0	6	4	2	4	0	168.11	411.351	800.1	391.65		274.155
000529-19-1	8	7	1	0	0	117.15	2.82321e+06	1.76923e+06	259.65		181.755
000530-48-3	14	12	0	0	0	180.25	126892	60830.8	281.35		196.945
000530-50-7	12	12	2	0	0	184.24	4858.76	6921.28	323.65		226.555
000532-34-3	12	18	0	4	0	226.27	3648.56	164185
000534-15-6	4	10	0	2	0	90.123	8.29062e+08	8.5725e+08	159.95		111.965
000534-22-5	5	6	0	1	0	82.103	6.89486e+08	7.10446e+08	185.65		129.955
000534-52-1	7	6	2	5	0	198.14	1278.61	18.1136	359.75		251.825
000535-77-3	10	14	0	0	0	134.22	1.24029e+07	8.79744e+06	209.45		146.615
000536-74-3	8	6	0	0	0	102.14	1.13073e+07	3.0409e+07	228.35		159.845
000536-75-4	7	9	1	0	0	107.16	1.3046e+07	9.7311e+06	182.65		127.855
000536-78-7	7	9	1	0	0	107.16	1.45679e+07	1.14009e+07	196.25		137.375
000536-90-3	7	9	1	1	0	123.16	496430	170772	272.15		190.505
000538-68-1	11	16	0	0	0	148.25	3.49239e+06	2.19021e+06	198.15		138.705
000538-86-3	8	10	0	1	0	122.17	1.08983e+07	1.02418e+07	220.55		154.385
000538-93-2	10	14	0	0	0	134.22	1.39173e+07	9.87909e+06	221.75		155.225
000539-30-0	9	12	0	1	0	136.2	6.76974e+06	5.27674e+06
000539-82-2	7	14	0	2	0	130.19	3.35796e+07	3.35796e+07	181.95		127.365
000539-88-8	7	12	0	3	0	144.17	1.61182e+06	2.09227e+06
000540-42-1	7	14	0	2	0	130.19	4.52346e+07	5.09991e+07	201.75		141.225
000540-67-0	3	8	0	1	0	60.097	4.81093e+09	4.48805e+09	160.15		112.105
000540-73-8	2	8	2	0	0	60.099	2.25694e+08	2.69929e+08	264.15		184.905
000540-84-1	8	18	0	0	0	114.23	3.02443e+08	2.7361e+08	165.85		116.095
000540-88-5	6	12	0	2	0	116.16	2.93391e+08	2.65925e+08
000541-35-5	4	9	1	1	0	87.122	18305.8	90826.5	387.95		271.565
000541-58-2	5	7	1	0	1	113.18	3.0885e+07	2.93709e+07
000542-55-2	5	10	0	2	0	102.13	2.19998e+08	2.22304e+08	177.35		124.145
000542-85-8	3	5	1	0	1	89.16	5.34612e+07	4.37746e+07	267.25
000542-92-7	5	6	0	0	0	66.104	1.54499e+09	1.51657e+09	188.15		131.705
000543-29-3	4	9	1	3	0	119.12	5.31644e+07	8.38899e+07
000543-49-7	7	16	0	1	0	116.2	7.67812e+06	5.37468e+06
000544-01-4	10	22	0	1	0	158.29	1.19036e+07	1.58997e+07
000544-02-5	10	22	0	0	1	174.35	2.98323e+06	1.93826e+06	198.55
000544-13-8	5	6	2	0	0	94.117	41676.8	20689.2	244.15		170.905
000544-25-2	7	8	0	0	0	92.142	1.16444e+08	1.05453e+08	193.65		135.555
000544-40-1	8	18	0	0	1	146.3	9.42813e+06	5.94758e+06	193.45
000544-63-8	14	28	0	2	0	228.38	17.1773	3190.07	327.05		228.935
000544-76-3	16	34	0	0	0	226.45	17391.5	84646.5	291.25		203.875
000546-80-5	10	16	0	1	0	152.24	3.36757e+06	3.67267e+06
000547-63-7	5	10	0	2	0	102.13	2.70409e+08	2.83231e+08	188.45		131.915
000548-39-0	13	8	0	1	0	180.21	65.8678	171.45	427.15		299.005
000552-30-7	9	4	0	5	0	192.13	101.875	5.87902	435.15		304.605
000552-82-9	13	13	1	0	0	183.26	30607.2	27081.7	265.65		185.955
000552-89-6	7	5	1	3	0	151.12	145453	51192.8	316.65		221.655
000553-26-4	10	8	2	0	0	156.19	466.757	1788.12	384.15		268.905
000553-90-2	4	6	0	4	0	118.09	7.2644e+06	6.604e+06	327.45		229.215
000554-12-1	4	8	0	2	0	88.107	3.97979e+08	4.16258e+08	185.65		129.955
000554-14-3	5	6	0	0	1	98.168	1.31263e+08	1.1444e+08	209.75
000555-10-2	10	16	0	0	0	136.24	1.16074e+07	1.42714e+07
000556-24-1	6	12	0	2	0	116.16	8.73932e+07	1.14235e+08
000556-61-6	2	3	1	0	1	73.117	1.39144e+07	4.79263e+07	309.15
000556-64-9	2	3	1	0	1	73.117	4.74156e+07	3.44913e+07	268.15
000557-00-6	8	16	0	2	0	144.22	2.00703e+07	2.36349e+07
000557-17-5	4	10	0	1	0	74.124	1.85324e+09	1.82385e+09
000557-31-3	5	10	0	1	0	86.135	7.08079e+08	7.2659e+08
000558-37-2	6	12	0	0	0	84.163	1.94628e+09	1.91662e+09	157.95		110.565
000560-21-4	8	18	0	0	0	114.23	1.65638e+08	1.43553e+08	172.25		120.575
000560-23-6	8	16	0	0	0	112.22	1.82067e+08	1.85032e+08	204.15		142.905
000561-27-3	21	23	1	5	0	369.42	0.0150716	1.23115	446.15		312.305
000562-49-2	7	16	0	0	0	100.21	4.45038e+08	4.09521e+08	138.25		96.775
000563-16-6	8	18	0	0	0	114.23	1.75454e+08	1.61957e+08	147.05		102.935
000563-45-1	5	10	0	0	0	70.135	3.40005e+09	3.39779e+09	104.65		73.255
000563-46-2	5	10	0	0	0	70.135	2.29784e+09	2.29784e+09	135.65		94.955
000563-78-0	6	12	0	0	0	84.163	1.13913e+09	1.12104e+09	115.85		81.095
000563-79-1	6	12	0	0	0	84.163	5.69563e+08	5.69563e+08	198.55		138.985
000563-80-4	5	10	0	1	0	86.135	2.4158e+08	2.52224e+08	181.15		126.805
000564-02-3	8	18	0	0	0	114.23	1.96925e+08	1.75454e+08	160.95		112.665
000565-59-3	7	16	0	0	0	100.21	3.70775e+08	3.53017e+08
000565-61-7	6	12	0	1	0	100.16	6.24775e+07	1.0978e+08
000565-69-5	6	12	0	1	0	100.16	9.74509e+07	1.32919e+08
000565-75-3	8	18	0	0	0	114.23	1.66252e+08	1.51528e+08	163.95		114.765
000565-77-5	8	16	0	0	0	112.22	1.35568e+08	1.31391e+08	159.75		111.825
000565-80-0	7	14	0	1	0	114.19	8.23283e+07	9.14077e+07	204.15		142.905
000569-41-5	12	12	0	0	0	156.23	40211.6	29382.2	338.15		236.705
000571-58-4	12	12	0	0	0	156.23	179651	86467.6	280.75		196.525
000571-61-9	12	12	0	0	0	156.23	41974.6	29382.2	355.15		248.605
000573-98-8	12	12	0	0	0	156.23	106615	101578	274.75		192.325
000575-41-7	12	12	0	0	0	156.23	194762	113331	267.15		187.005
000575-43-9	12	12	0	0	0	156.23	122566	107455	256.25		179.375
000576-26-1	8	10	0	1	0	122.17	1.12266e+06	689351	318.85		223.195
000577-55-9	12	18	0	0	0	162.28	3.15758e+06	2.842e+06	216.15		151.305
000578-54-1	8	11	1	0	0	121.18	1.10694e+06	1.44554e+06	226.65		158.655
000579-44-2	14	12	0	2	0	212.25	144.089	6.58269	410.15		287.105
000579-66-8	10	15	1	0	0	149.24	30709.8	470669	276.65		193.655
000579-75-9	8	8	0	3	0	152.15	129.975	6993.61	374.15		261.905
000580-15-4	9	8	2	0	0	144.18	126.311	1991.53	387.15		271.005
000580-17-6	9	8	2	0	0	144.18	223.95	3432.87	364.65		255.255
000581-40-8	12	12	0	0	0	156.23	9234.4	14523.2	378.15		264.705
000581-42-0	12	12	0	0	0	156.23	36098.1	20567.5	385.15		269.605
000582-16-1	12	12	0	0	0	156.23	47683.1	20567.5	385.15		269.605
000583-48-2	8	18	0	0	0	114.23	1.33124e+08	1.26989e+08
000583-57-3	8	16	0	0	0	112.22	8.72124e+07	9.76393e+07
000583-58-4	7	9	1	0	0	107.16	7.11695e+06	5.81563e+06	262.15		183.505
000583-60-8	7	12	0	1	0	112.17	1.3561e+07	1.81416e+07
000583-61-9	7	9	1	0	0	107.16	1.54892e+07	1.36466e+07
000584-02-1	5	12	0	1	0	88.151	4.15311e+07	4.0584e+07	204.15		142.905
000584-03-2	4	10	0	2	0	90.123	242645	362273
000584-79-2	19	26	0	3	0	302.42	19.502	573.685	233.15		163.205
000584-84-9	9	6	2	2	0	174.16	74908.4	241580	293.65		205.555
000584-94-1	8	18	0	0	0	114.23	1.43553e+08	1.38645e+08
000585-34-2	10	14	0	1	0	150.22	162248	108972	315.45		220.815
000586-62-9	10	16	0	0	0	136.24	5.43775e+06	7.31864e+06
000589-16-2	8	11	1	0	0	121.18	931787	970204	268.35		187.845
000589-34-4	7	16	0	0	0	100.21	3.30953e+08	3.3472e+08	154.15		107.905
000589-38-8	6	12	0	1	0	100.16	7.50322e+07	8.71779e+07	217.65		152.355
000589-43-5	8	18	0	0	0	114.23	1.86496e+08	1.79135e+08
000589-53-7	8	18	0	0	0	114.23	1.25762e+08	1.26989e+08	152.15		106.505
000589-55-9	7	16	0	1	0	116.2	6.1737e+06	6.01765e+06	231.95		162.365
000589-59-3	9	18	0	2	0	158.24	1.56702e+07	1.42843e+07
000589-62-8	8	18	0	1	0	130.23	2.17568e+06	2.10572e+06
000589-81-1	8	18	0	0	0	114.23	1.20241e+08	1.25149e+08	173.15		121.205
000589-82-2	7	16	0	1	0	116.2	4.61935e+06	4.61311e+06
000589-90-2	8	16	0	0	0	112.22	1.07783e+08	1.16323e+08	186.15		130.305
000589-92-4	7	12	0	1	0	112.17	9.04067e+06	1.25967e+07	232.55		162.785
000589-93-5	7	9	1	0	0	107.16	1.93326e+07	1.66408e+07	257.15		180.005
000589-98-0	8	18	0	1	0	130.23	1.79091e+06	696778	228.15		159.705
000590-01-2	7	14	0	2	0	130.19	3.08968e+07	3.25303e+07	184.15		128.905
000590-18-1	4	8	0	0	0	56.108	4.82471e+09	5.21346e+09	134.25		93.975
000590-19-2	4	6	0	0	0	54.092	3.65566e+09	3.60335e+09	136.95		95.865
000590-35-2	7	16	0	0	0	100.21	5.65042e+08	5.36521e+08	149.35		104.545
000590-36-3	6	14	0	1	0	102.18	4.72052e+07	3.61724e+07	170.15		119.105
000590-66-9	8	16	0	0	0	112.22	1.36816e+08	1.15118e+08	239.85		167.895
000590-67-0	7	14	0	1	0	114.19	6.93226e+06	6.25744e+06	298.15		208.705
000590-73-8	8	18	0	0	0	114.23	2.08581e+08	1.99993e+08	152.05		106.435
000590-86-3	5	10	0	1	0	86.135	2.31398e+08	2.38803e+08	222.15		155.505
000591-21-9	8	16	0	0	0	112.22	1.29276e+08	9.34203e+07
000591-22-0	7	9	1	0	0	107.16	9.99597e+06	8.17643e+06	266.55		186.585
000591-23-1	7	14	0	1	0	114.19	2.93793e+06	3.15939e+06
000591-24-2	7	12	0	1	0	112.17	9.04067e+06	1.2898e+07
000591-48-0	7	12	0	0	0	96.174	1.79104e+08	1.97345e+08
000591-49-1	7	12	0	0	0	96.174	1.58134e+08	2.08194e+08	152.75		106.925
000591-76-4	7	16	0	0	0	100.21	3.55169e+08	3.48712e+08	154.95		108.465
000591-78-6	6	12	0	1	0	100.16	6.24237e+07	7.31864e+07	217.65		152.355
000591-87-7	5	8	0	2	0	100.12	1.46373e+08	1.7328e+08
000591-93-5	5	8	0	0	0	68.12	2.73666e+09	2.68594e+09	124.35		87.045
000591-95-7	5	8	0	0	0	68.12	1.34744e+09	1.35395e+09	135.85		95.095
000592-13-2	8	18	0	0	0	114.23	1.85883e+08	1.82202e+08	182.15		127.505
000592-27-8	8	18	0	0	0	114.23	1.26989e+08	2.76063e+08	164.25		114.975
000592-41-6	6	12	0	0	0	84.163	8.31742e+08	8.31742e+08	133.45		93.415
000592-42-7	6	10	0	0	0	82.147	9.74503e+08	9.48733e+08	132.45		92.715
000592-43-8	6	12	0	0	0	84.163	6.77689e+08	7.82018e+08	175.15		122.605
000592-45-0	6	10	0	0	0	82.147	7.6031e+08	7.63399e+08	183.15		128.205
000592-47-2	6	12	0	0	0	84.163	7.45584e+08	7.23254e+08	183.15		128.205
000592-48-3	6	10	0	0	0	82.147	5.71225e+08	5.56001e+08	184.15		128.905
000592-57-4	6	8	0	0	0	80.131	4.18755e+08	4.07691e+08	184.15		128.905
000592-76-7	7	14	0	0	0	98.19	3.12732e+08	2.95329e+08	153.45		107.415
000592-77-8	7	14	0	0	0	98.19	2.55248e+08	2.4681e+08	181.65		127.155
000592-84-7	5	10	0	2	0	102.13	1.58632e+08	1.58083e+08	181.65		127.155
000592-88-1	6	10	0	0	1	114.21	5.65378e+07	4.15936e+07	188.15
000592-99-4	8	16	0	0	0	112.22	1.07518e+08	1.02461e+08	183.15		128.205
000593-08-8	13	26	0	1	0	198.35	111026	216298	303.65		212.555
000593-45-3	8	38	0	0	0	254.5	2461.12	10528.1	301.35		210.945
000593-49-7	27	56	0	0	0	380.75	5.7503	20.122	332.65		232.855
000593-77-1	1	5	1	1	0	47.057	4.21877e+06	9.38347e+06	360.65		252.455
000594-11-6	4	8	0	0	0	56.108	4.77046e+09	5.24359e+09	95.85		67.095
000594-56-9	7	14	0	0	0	98.19	5.88021e+08	5.53741e+08	163.25		114.275
000594-60-5	6	14	0	1	0	102.18	1.75647e+07	4.1826e+07	259.15		181.405
000594-61-6	4	8	0	3	0	104.11	48970.3	50985.1	355.65		248.955
000594-70-7	4	9	1	2	0	103.12	6.65135e+07	5.70908e+07	299.38		209.566
000594-82-1	8	18	0	0	0	114.23	1.27934e+08	3.52748e+07	373.85		261.695
000595-37-9	6	12	0	2	0	116.16	923871	4.50075e+06	259.15		181.405
000597-96-6	7	16	0	1	0	116.2	1.22101e+07	1.24847e+07	302.65		211.855
000598-03-8	6	14	0	2	1	150.24	33240.6	69580.9	302.65		211.855
000598-25-4	5	8	0	0	0	68.12	1.56037e+09	1.57351e+09	159.55		111.685
000598-53-8	4	10	0	1	0	74.124	2.40875e+09	2.47295e+09
000598-61-8	5	10	0	0	0	70.135	5.58224e+09	1.90984e+09	111.65		78.155
000598-75-4	5	12	0	1	0	88.151	4.33307e+07	5.06708e+07
000598-82-3	3	6	0	3	0	90.079	393996	138516	289.95		202.965
000599-64-4	2	16	0	1	0	212.29	179.005	88.2973	348.15		243.705
000600-24-8	4	9	1	2	0	103.12	4.31784e+07	3.60282e+07
000600-36-2	7	16	0	1	0	116.2	1.87146e+07	1.57932e+07
000602-55-1	20	14	0	0	0	254.33	0.683432	2.00929	429.15		300.405
000603-34-9	18	15	1	0	0	245.33	5169.57	73.3048	400.15		280.105
000605-32-3	14	8	0	3	0	224.22	0.000825233	0.0166348	579.15		405.405
000606-20-2	7	6	2	4	0	182.14	5553.23	7894.02	339.15		237.405
000608-34-4	5	6	2	2	0	126.12	4820.94	106.454
000608-68-4	6	10	0	6	0	178.14	6197.49	6456.12	331.15		231.805
000609-26-7	6	18	0	0	0	114.23	1.16237e+08	1.09457e+08	158.25		110.775
000609-72-3	9	13	1	0	0	135.21	6.26519e+06	3.51618e+06	213.15		149.205
000610-69-5	8	7	1	4	0	181.15	21233.7	35649.3	313.65		219.555
000611-14-3	9	12	0	0	0	120.2	1.68544e+07	1.26569e+07	192.35		134.645
000611-15-4	9	10	0	0	0	118.18	1.17602e+07	1.0033e+07	204.65		143.255
000611-32-5	10	9	1	0	0	143.19	192229	105426	193.15		135.205
000611-34-7	9	8	2	0	0	144.18	132.51	1294.11	343.15		240.205
000612-00-0	14	14	0	0	0	182.27	114591	78352.5	255.25		178.675
000612-60-2	10	9	1	0	0	143.19	68026.8	103118	251.15		175.805
000612-94-2	16	12	0	0	0	204.27	384.229	317.263	376.65		263.655
000613-12-7	15	12	0	0	0	192.26	55.1739	26.6571	482.15		337.505
000614-99-3	7	8	0	3	0	140.14	2.53892e+06	2.39578e+06	307.65		215.355
000615-53-2	4	8	2	3	0	132.12	8.382e+06	492975
000615-77-0	5	6	2	2	0	126.12	3451.28	1.00351	510.15		357.105
000616-38-6	3	6	0	3	0	90.079	2.68314e+08	2.72189e+08	276.15		193.305
000616-44-4	5	6	0	0	1	98.168	1.16813e+08	1.00728e+08	204.15
000616-45-5	4	7	1	1	0	85.106	43408.7	162382	296.15		207.305
000617-29-8	7	16	0	1	0	116.2	8.40223e+06	1.39205e+07
000617-50-5	7	14	0	2	0	130.19	1.1203e+08	1.06336e+08
000617-78-7	7	16	0	0	0	100.21	3.1158e+08	3.02432e+08	154.55		108.185
000617-84-5	5	11	1	1	0	101.15	6.56568e+06	5.92433e+06
000618-45-1	9	12	0	1	0	136.2	508646	269326	299.15		209.405
000618-85-9	7	6	2	4	0	182.14	3966.6	1890.25	366.15		256.305
000619-99-8	8	18	0	0	0	114.23	1.22879e+08	1.22081e+08
000620-14-4	9	12	0	0	0	120.2	1.96312e+07	1.524e+07	177.65		124.355
000620-17-7	8	10	0	1	0	122.17	328263	451033	269.15		188.405
000620-79-1	13	16	0	3	0	220.27	14680.3	33977.9
000621-36-3	9	10	0	2	0	150.18	478671	17677.7	335.15		234.605
000621-82-9	9	8	0	2	0	148.16	398.22	1282.27	406.15		284.305
000622-08-2	9	12	0	2	0	138.17	163593	18077
000622-45-7	8	14	0	2	0	142.2	8.25284e+07	1.03161e+07	208.15		145.705
000622-78-6	8	7	1	0	1	149.22	122999	284647
000622-96-8	9	12	0	0	0	120.2	1.93729e+07	1.4788e+07	210.85		147.595
000622-97-9	9	10	0	0	0	118.18	1.14935e+07	8.6995e+06	239.05		167.335
000623-37-0	6	14	0	1	0	102.18	2.63965e+07	1.72903e+07
000623-42-7	5	10	0	2	0	102.13	1.77184e+08	1.82234e+08	187.35		131.145
000623-73-4	4	6	2	2	0	114.1	1.71773e+07	3.09805e+07	251.15		175.805
000624-24-8	6	12	0	2	0	116.16	1.19529e+08	6.99146e+07
000624-29-3	8	16	0	0	0	112.22	1.0812e+08	1.16323e+08	186.15		130.305
000624-48-6	6	8	0	4	0	144.13	2.32474e+06	617607	254.15		177.905
000624-54-4	8	16	0	2	0	144.22	2.78969e+07	1.29411e+07	200.05		140.035
000624-64-6	4	8	0	0	0	56.108	5.28879e+09	5.21346e+09	167.65		117.355
000624-83-9	2	3	1	1	0	57.052	1.06745e+09	1.34964e+09	228.15		159.705
000624-89-5	3	8	0	0	1	76.161	6.54332e+08	6.13474e+08	167.25
000624-92-0	2	6	0	0	2	94.198	1.45178e+08	1.23933e+08	188.15
000624-95-3	6	14	0	1	0	102.18	1.34315e+07	1.0978e+07	213.15		149.205
000625-04-7	6	13	1	1	0	115.18	1.23771e+06	5.97196e+06
000625-22-9	8	18	0	4	1	210.29	133350	10103
000625-23-0	7	16	0	1	0	116.2	1.29467e+07	1.24847e+07
000625-27-4	6	12	0	0	0	84.163	7.14213e+08	7.18734e+08	138.15		96.705
000625-44-5	5	12	0	0	0	88.151	8.17613e+08	8.56281e+08
000625-45-6	3	6	0	3	0	90.079	702267	1.4675e+06	280.85		196.595
000625-55-8	4	8	0	2	0	88.107	6.53512e+08	6.72454e+08	193.15		135.205
000625-58-1	2	5	1	3	0	91.067	3.13415e+08	3.15859e+08	178.55		124.985
000625-74-1	4	9	1	2	0	103.12	3.81344e+07	3.44208e+07	196.3		137.41
000625-77-4	4	7	1	2	0	101.11	53808.2	170121	352.15		246.505
000625-80-9	6	14	0	0	1	118.24	1.22193e+08	9.906e+07	195.05
000625-84-3	6	9	1	0	0	95.145	4.11539e+06	7.61731e+06	280.85		196.595
000626-67-5	6	13	1	0	0	99.177	1.03136e+08	1.47573e+08
000626-93-7	6	14	0	1	0	102.18	1.36566e+07	1.61376e+07
000627-05-4	4	9	1	2	0	103.12	2.10072e+07	1.93444e+07	191.82		134.274
000627-12-3	4	9	1	2	0	103.12	306517	1.05313e+06	333.15		233.205
000627-13-4	3	7	1	3	0	105.09	1.32536e+08	1.37305e+08	173.15		121.205
000627-19-0	5	8	0	0	0	68.12	1.59554e+09	1.61742e+09	183.15		128.205
000627-20-3	5	10	0	0	0	70.135	1.86464e+09	1.90984e+09	121.75		85.225
000627-21-4	5	8	0	0	0	68.12	8.62868e+08	8.92874e+08	163.85		114.695
000627-59-8	7	16	0	1	0	116.2	1.26658e+07	7.99023e+06
000627-90-7	13	26	0	2	0	214.35	49519.2	140496	258.15		180.705
000627-93-0	8	14	0	4	0	174.2	565372	6.43276e+06	283.45		198.415
000627-97-4	8	16	0	0	0	112.22	1.07222e+08	1.01256e+08
000628-28-4	5	12	0	1	0	88.151	6.573e+08	6.72454e+08	157.65		110.355
000628-29-5	5	12	0	0	1	104.22	8.73127e+07	7.49945e+07	175.35
000628-32-0	5	12	0	1	0	88.151	8.55248e+08	8.8082e+08	145.65		101.955
000628-36-4	2	4	2	2	0	88.066	3.54696	161.484	429.15		300.405
000628-41-1	6	8	0	0	0	80.131	2.86779e+08	3.34074e+08	223.95		156.765
000628-55-7	8	18	0	1	0	130.23	1.0756e+08	1.1543e+08
000628-63-7	7	14	0	2	0	130.19	2.44852e+07	2.91024e+07	202.35		141.645
000628-71-7	7	12	0	0	0	96.174	2.71272e+08	2.25759e+08	192.15		134.505
000628-73-9	6	11	1	0	0	97.161	1.48768e+07	1.10662e+07	192.85		134.995
000628-81-9	6	14	0	1	0	102.18	2.83231e+08	3.2385e+08	149.15		104.405
000628-87-5	4	5	3	0	0	95.105	17432.9	81796.6	343.15		240.205
000628-96-6	2	4	2	6	0	152.06	588935	3.18189e+06	250.85		175.595
000628-97-7	18	36	2	0	0	284.49	352.586	4008.03	297.15		208.005
000628-99-9	9	20	0	1	0	144.26	523455	844657	237.65		166.355
000629-05-0	8	14	0	0	0	110.2	8.05051e+07	8.52406e+07	193.85		135.695
000629-11-8	6	14	2	0	0	118.18	3067.37	7852.47	318.15		222.705
000629-14-1	6	14	2	0	0	118.18	2.06925e+08	1.18401e+08	199.15		139.405
000629-19-6	6	14	0	0	2	150.31	4.13288e+06	4.01987e+06	187.55
000629-20-9	6	8	0	0	0	104.15	3.35796e+07	3.35366e+07	268.45		187.915
000629-45-8	8	18	0	0	2	178.36	605381	482772
000629-50-5	13	28	0	0	0	184.37	552514	911946	267.85		187.495
000629-59-4	14	30	0	0	0	198.4	123599	393172	278.95		195.265
000629-62-9	15	32	0	0	0	212.42	39131.1	174550	283.05		198.135
000629-73-2	16	32	0	0	0	224.43	31823.2	92335.4	277.25		194.075
000629-76-5	15	32	0	1	0	228.42	472.743	348.453	318.15		222.705
000629-78-7	7	36	0	0	0	240.48	1472.34	20922.7	295.15		206.605
000629-92-5	19	40	0	0	0	268.53	707.112	9706.03	305.25		213.675
000629-94-7	21	44	0	0	0	296.58	1389.79	2261.89	313.65		219.555
000629-96-9	20	42	0	1	0	298.56	0.725168	8.01822	339.25		237.475
000629-97-0	22	46	0	0	0	310.61	21.3532	1154.41	317.55		222.285
000629-99-2	25	52	0	0	0	352.69	28.603	182.415	327.15		229.005
000630-01-3	26	54	0	0	0	366.72	9.23928	103.6	329.55		230.685
000630-02-4	28	58	0	0	0	394.77	0.0339241	32.8639	337.65		236.355
000630-03-5	29	60	0	0	0	408.8	0.00944105	20.9899	336.85		235.795
000630-04-6	31	64	0	0	0	436.86	0.000328478	8.00078	341.05		238.735
000630-05-7	33	68	0	0	0	464.91	0.00100377	1.73288	345.15		241.605
000630-07-9	35	72	0	0	0	492.96	0.000142707	1.32117	348.15		243.705
000630-18-2	5	9	1	0	0	83.134	1.53916e+08	1.28636e+08	288.15		201.705
000634-97-9	5	5	1	2	0	111.1	13.4579	800.423	479.15		335.405
000635-11-0	18	30	0	0	0	246.44	26476.3	26343.9	391.55		274.085
000637-78-5	6	12	0	2	0	116.16	1.40641e+08	1.54811e+08
000637-92-3	6	4	0	1	0	102.18	6.12915e+08	6.28757e+08	179.15		125.405
000638-04-0	8	16	0	0	0	112.22	1.29583e+08	9.34203e+07	197.55		138.285
000638-53-9	13	26	0	2	0	214.35	145.103	7715.79	317.65		222.355
000638-67-5	23	48	0	0	0	324.64	303.03	617.22	320.75		224.525
000638-68-6	30	62	0	0	0	422.83	0.000619964	12.7626	338.95		237.265
000644-35-9	9	12	0	1	0	136.2	658678	459611	280.15		196.105
000644-49-5	7	14	0	2	0	130.19	5.87434e+07	5.48468e+07
000644-64-4	10	16	4	3	0	240.26	1252.78	457.2	343.15		240.205
000645-49-8	14	12	0	0	0	180.25	66449	13367.3	268.15		187.705
000645-56-7	9	12	0	1	0	136.2	274449	226146	295.15		206.605
000645-62-5	8	14	0	1	0	126.2	8.67227e+06	3.13937e+06
000646-04-8	5	10	0	0	0	70.135	1.90608e+09	1.90984e+09	132.95		93.065
000646-06-0	3	6	0	2	0	74.08	3.14594e+08	4.14149e+08	178.15		124.705
000646-31-1	24	5	0	0	0	338.67	64.1574	266.469	327.15		229.005
000659-70-1	10	20	0	2	0	172.27	8.20075e+06	5.37769e+06
000673-04-1	8	15	5	1	0	197.24	25.443	1282.75
000674-76-0	6	12	0	0	0	84.163	1.00804e+09	9.85434e+08	132.35		92.645
000674-82-8	4	4	0	2	0	84.075	4.8458e+07	5.3792e+07	266.65		186.655
000675-20-7	5	9	1	1	0	99.134	23334.6	76716.6	312.65		218.855
000689-97-4	4	4	0	0	0	52.076	3.78331e+09	4.19746e+09
000690-08-4	7	14	0	0	0	98.19	5.84909e+08	5.01004e+08	157.95		110.565
000691-37-2	6	12	0	0	0	84.163	1.22781e+09	1.19789e+09	119.55		83.685
000691-38-3	6	12	0	0	0	84.163	1.10296e+09	9.85434e+08	138.35		96.845
000692-45-5	3	4	0	2	0	72.064	1.21274e+09	1.00351e+09
000693-02-7	6	10	0	0	0	82.147	5.86714e+08	6.00129e+08
000693-21-0	4	8	2	7	0	196.12	62230	309040	261.85		183.295
000693-54-9	10	20	0	1	0	156.27	2.25655e+06	2.69477e+06	287.15		201.005
000693-65-2	10	22	0	1	0	158.29	7.28668e+06	7.05711e+06	204.15		142.905
000696-29-7	9	18	0	0	0	126.24	3.25261e+07	2.81391e+07	183.75		128.625
000697-82-5	9	12	0	1	0	136.2	27810.8	52108.7	366.65		256.655
000698-71-5	9	12	0	1	0	136.2	64257.7	102461	324.75		227.325
000700-12-9	11	16	0	0	0	148.25	277161	283533	327.65		229.355
000700-38-9	7	7	1	3	0	153.14	164669	10538.8	326.15		228.305
000730-40-5	12	1	4	2	0	242.24	0.00376157	1.04948	488.15		341.705
000732-26-3	18	30	0	1	0	262.44	9319.54	2819.83	404.15		282.905
000759-94-4	9	19	1	1	1	189.32	244098	38242.1
000760-20-3	6	12	0	0	0	84.163	1.21597e+09	1.18433e+09	120.15		84.105
000760-21-4	6	12	0	0	0	84.163	7.91059e+08	7.91059e+08	141.65		99.155
000763-29-1	6	12	0	0	0	84.163	8.81466e+08	8.76945e+08	137.45		96.215
000763-32-6	5	10	0	1	0	86.135	1.64506e+07	1.69383e+07
000764-99-8	8	14	0	3	0	158.2	195558	4.83794e+06
000776-35-2	14	12	0	0	0	180.25	5811.86	9880.17	307.65		215.355
000779-02-2	15	12	0	0	0	192.26	413.288	689.158	354.65		248.255
000816-79-5	7	14	0	0	0	98.19	2.78548e+08	2.67905e+08
000818-23-5	15	30	0	1	0	226.41	4917.04	47066.4	316.15		221.305
000818-38-2	9	16	0	4	0	188.23	1.62883e+06	563514	249.05		174.335
000818-61-1	5	8	0	3	0	116.12	326476	786539
000821-11-4	4	8	0	2	0	88.107	33101.8	25761.6	298.15		208.705
000821-55-6	9	18	0	1	0	142.24	4.76831e+06	4.94407e+06	265.65		185.955
000821-95-4	11	22	0	0	0	154.3	4.08646e+06	6.05801e+06	223.95		156.765
000822-50-4	7	14	0	0	0	98.19	3.37677e+08	2.32571e+08	155.55		108.885
000823-40-5	7	10	2	0	0	122.17	16150.5	16807	379.15		265.405
000827-52-1	12	16	0	0	0	160.26	343546	396929	280.45		196.315
000830-13-7	12	22	0	1	0	168.33	43133.1	49264.1	332.15		232.505
000832-69-9	15	12	0	0	0	192.26	154.983	253.139	396.15		277.305
000834-12-8	9	17	5	0	1	227.33	33.4709	525.274	361.15
000841-06-5	11	21	5	1	1	271.39	4.15629	19.9794
000868-77-9	6	10	0	3	0	130.14	881466	553365
000870-23-5	3	6	0	0	1	74.145	2.08827e+09	6.41135e+08
000871-83-0	10	22	0	0	0	142.29	1.44119e+07	1.82632e+07	198.55		138.985
000872-05-9	10	20	0	0	0	140.27	1.25816e+07	1.57458e+07	206.85		144.795
000872-50-4	5	9	1	1	0	99.134	1.838e+06	1.73678e+06	249.15		174.405
000872-55-9	6	8	0	0	1	112.19	6.76242e+07	5.03264e+07
000872-93-5	5	10	0	2	1	134.2	52359.2	47881.1	274.15		191.905
000874-14-6	6	8	2	2	0	140.14	41587.1	472.375	393.15		275.205
000874-41-9	10	14	0	0	0	134.22	6.15893e+06	4.62226e+06	210.25		147.175
000877-43-0	11	11	1	0	0	157.22	36667.5	45285.2	333.15		233.205
000878-13-7	11	20	0	1	0	168.28	446609	228729
000882-33-7	12	10	0	0	2	218.34	2580.9	6076.84	335.15
000886-50-0	10	19	5	0	1	241.36	21.9177	304.773	377.15
000919-94-8	7	16	0	1	0	116.2	3.12119e+08	2.48446e+08
000921-47-1	9	20	0	0	0	128.26	6.2131e+07	5.70337e+07
000922-61-2	6	12	0	0	0	84.163	7.09693e+08	7.05173e+08
000924-16-3	8	18	2	1	0	158.25	398769	126688
000925-60-0	6	10	0	2	0	114.15	8.87084e+07	8.03651e+07
000927-49-1	11	22	0	1	0	170.3	457415	1.28076e+06	287.65		201.355
000928-45-0	4	9	1	3	0	119.12	5.31516e+07	5.59693e+07
000929-06-6	4	11	1	2	0	105.14	8701.65	139000
000930-55-2	4	8	2	1	0	100.12	322881	1.42068e+06
000930-90-5	8	16	0	0	0	112.22	1.20542e+08	1.07885e+08	167.25		117.075
000931-54-4	7	5	1	0	0	103.12	1.33138e+07	1.71272e+08
000933-98-2	10	14	0	0	0	134.22	4.48237e+06	3.50455e+06	223.65		156.555
000934-74-7	10	14	0	0	0	134.22	7.43456e+06	5.84092e+06	188.85		132.195
000934-80-5	10	14	0	0	0	134.22	5.39528e+06	4.37709e+06	206.25		144.375
000937-30-4	10	12	0	1	0	148.21	7.28185e+06	665028	252.55		176.785
000939-27-5	12	12	0	0	0	156.23	265531	148590	265.75		186.025
000941-98-0	12	10	0	1	0	170.21	3587.05	17381.8	307.15		215.005
000946-80-5	13	12	0	1	0	184.24	62400.5	28912.9	313.15		219.205
000957-51-7	16	17	1	1	0	239.32	0.385843	55.9472	408.15		285.705
000961-68-2	12	9	3	4	0	259.22	0.0418131	3.98618	432.15		302.505
000994-05-8	6	10	0	1	0	102.18	3.96637e+08	3.96584e+08
000999-21-3	10	10	0	4	0	196.2	71251.8	855022
001002-16-0	5	11	1	3	0	133.15	3.6287e+07	2.06843e+07
001002-84-2	15	30	0	2	0	242.41	5.66495	1745.07	325.45		227.815
001003-78-7	6	12	0	2	1	148.23	60927.7	42370.6	270.15		189.105
001014-69-3	8	15	5	0	1	213.31	11.4394	528.411	358.15
001014-70-6	8	15	5	0	1	213.31	8.13822	856.233	355.65
001067-08-9	8	18	0	0	0	114.23	1.41099e+08	1.24535e+08	182.25		127.575
001067-20-5	9	20	0	0	0	128.26	5.02627e+07	4.16043e+07	240.05		168.035
001068-87-7	9	20	0	0	0	128.26	6.92257e+07	6.33019e+07	150.75		105.525
001069-53-0	9	20	0	0	0	128.26	8.0908e+07	7.99023e+07	145.25		101.675
001070-87-7	9	20	0	0	0	128.26	1.37694e+08	1.17787e+08	206.65		144.655
001071-26-7	9	20	0	0	0	128.26	7.41852e+07	7.50807e+07	160.15		112.105
001071-81-4	10	22	0	0	0	142.29	6.68098e+07	6.81624e+07	260.55		182.385
001074-17-5	10	14	0	0	0	134.22	7.16631e+06	5.45874e+06	212.85		148.995
001074-43-7	10	14	0	0	0	134.22	1.91813e+07	6.31685e+06	190.65		133.455
001074-55-1	10	14	0	0	0	134.22	7.96096e+06	5.89861e+06	209.55		146.685
001077-16-3	12	18	0	0	0	162.28	1.05137e+06	834293	212.15		148.505
001078-71-3	13	20	0	0	0	176.3	293607	438516	225.15		157.605
001081-77-2	15	24	0	0	0	204.36	62684.2	59939.7	249.15		174.405
001114-71-2	10	21	1	1	1	203.35	966787	3.56127e+06
001117-97-1	2	7	1	1	0	61.084	1.24412e+09	1.23098e+09
001119-40-0	7	12	0	4	0	160.17	1.54983e+06	1.53261e+06	230.65		161.455
001119-85-3	6	6	2	0	0	106.13	39587.4	52193.8	349.15		244.405
001120-21-4	11	24	0	0	0	156.31	3.45786e+06	5.2804e+06	247.55		173.285
001120-36-1	14	28	0	0	0	196.38	157895	1.09694e+06	261.15		182.805
001123-85-9	9	12	0	1	0	136.2	139054	73918.3	260.15		182.105
001126-79-0	10	14	0	1	0	150.22	2.38932e+06	1.7597e+06	253.75		177.625
001127-76-0	12	12	0	0	0	156.23	211468	144392	259.25		181.475
001129-41-5	9	11	1	2	0	165.19	9589.57	77160.5	349.65		244.755
001132-21-4	9	10	0	4	0	182.18	1.35158	196.861	458.65		321.055
001134-23-2	11	21	1	1	1	215.36	23139.8	6733.69	284.65		199.255
001186-53-4	9	20	0	0	0	128.26	8.69971e+07	7.43918e+07	152.15		106.505
001187-58-2	4	9	1	1	0	87.122	5.37936e+06	2.05998e+07	242.25		169.575
001190-76-7	4	5	1	0	0	67.091	1.15016e+08	713890	474.15		331.905
001191-95-3	4	6	0	1	0	70.092	1.61805e+08	1.69513e+08	222.25		155.575
001191-99-7	4	6	0	1	0	70.092	9.41737e+08	9.75639e+08
001192-18-3	7	14	0	0	0	98.19	2.49131e+08	2.32571e+08	219.15		153.405
001192-37-6	7	12	0	0	0	96.174	2.07843e+08	2.01478e+08	166.45		116.515
001195-79-5	10	14	0	1	0	152.24	6.59727e+06	5.81993e+06	278.15		194.705
001198-37-4	10	10	0	2	0	157.22	69193.1	47076.1
001199-77-5	10	10	0	2	0	162.19	7941.91	5631.69	353.15		247.205
001205-64-7	13	13	1	0	0	183.26	1467.33	7385.91	303.15		212.205
001214-39-7	12	11	5	0	0	225.25	0.000216734	0.0173145	506.15		354.305
001222-05-5	18	26	0	1	0	258.41	7566.72	7108.55	268.15		187.705
001300-73-8	8	11	1	0	0	605.92	900532	872533
001319-77-3	7	8	0	1	0	324.42	988017	1.45297e+06
001321-38-6	9	6	2	2	0	174.16	126033	241580	293.15		205.205
001323-65-5	24	42	0	1	0	346.6	0.0167575	0.0281154
001330-20-7	8	10	0	0	0	106.17	4.55768e+07	3.88458e+07
001335-40-6	7	8	0	3	0	140.14	3.05424e+06	2.39578e+06
001335-86-0	7	12	0	0	0	96.174	1.60149e+08	2.08194e+08
001435-60-5	12	9	3	3	0	243.22	0.00392301	0.360917	489.15		342.405
001444-64-0	12	16	0	1	0	176.26	347592	69897.3
001454-80-4	12	12	2	0	0	184.24	26.6455	128.722	354.15		247.905
001455-21-6	9	20	0	0	1	160.32	1.1331e+06	1.12793e+06	253.05
001459-09-2	22	38	0	0	0	302.55	57.856	299.031	300.15		210.105
001459-10-5	20	34	0	0	0	274.49	350.929	1189.91	289.15		202.405
001464-53-5	4	6	0	2	0	86.091	1.80491e+08	3.09611e+07	277.15		194.005
001466-76-8	9	10	0	4	0	182.18	1.86087	193.922	459.15		321.405
001471-03-0	6	12	0	1	0	100.16	3.26971e+08	3.3472e+08
001499-10-1	26	18	0	0	0	330.43	0.00253946	0.000458168	519.15		363.405
001521-38-6	9	10	0	4	0	182.18	18.217	1018.58	396.15		277.305
001528-74-1	12	8	2	4	0	244.21	0.359776	8.2197
001538-75-6	10	18	0	3	0	186.25	4.4041e+06	5.11476e+06
001551-21-9	4	10	0	0	1	90.188	3.87457e+08	3.45806e+08	171.65
001563-66-2	12	15	1	3	0	221.26	57.68	658.861	424.15		296.905
001569-01-3	6	14	0	2	0	118.18	1.0795e+07	8.5725e+06	193.15		135.205
001569-69-3	6	12	0	0	1	116.23	2.4751e+07	1.65423e+07
001574-41-0	5	8	0	0	0	68.12	1.39054e+09	1.50764e+09	132.35		92.645
001593-77-7	18	35	1	1	0	281.49	54.4378	629.059	344.15		240.905
001596-84-5	6	12	2	3	0	160.17	1722.03	53.2108	427.65		299.355
001610-17-9	9	17	5	1	0	211.27	32.9285	986.72
001610-18-0	10	9	5	1	0	225.3	26.6108	1411.53	364.65		255.255
001613-51-0	5	10	0	0	1	102.2	4.31434e+07	3.21105e+07	292.15
001632-16-2	8	16	0	0	0	112.22	1.18855e+08	1.1331e+08
001632-73-1	10	18	0	1	0	154.25	295027	204696
001634-04-4	5	12	0	1	0	88.151	1.1839e+09	1.19337e+09	164.55		115.185
001638-22-8	10	14	0	1	0	150.22	17919.9	103322	295.15		206.605
001638-26-2	7	14	0	0	0	98.19	4.01858e+08	3.77599e+08	203.35		142.345
001639-09-4	7	16	0	0	1	132.27	9.28413e+06	7.95579e+06	230.15
001640-89-7	7	14	0	0	0	98.19	2.1e+08	1.97237e+08	134.75		94.325
001646-87-3	7	14	2	3	1	206.27	1108.56	4766.8
001646-88-4	7	14	2	4	1	222.26	1075.19	667.815	414.15		289.905
001653-30-1	11	24	0	1	0	172.31	309148	57386.8
001656-48-0	6	8	2	1	0	124.14	1167.75	9542.22	246.85		172.795
001678-91-7	8	16	0	0	0	112.22	7.73279e+07	6.81064e+07	161.85		113.295
001678-92-8	9	18	0	0	0	126.24	2.84239e+07	2.58337e+07	178.25		124.775
001678-93-9	10	20	0	0	0	140.27	9.89954e+06	9.56805e+06	198.45		138.915
001678-98-4	10	20	0	0	0	140.27	3.63887e+07	1.48418e+07	178.15		124.705
001679-07-8	5	10	0	0	1	102.2	6.25744e+07	4.99497e+07
001679-09-0	5	12	0	0	1	104.22	2.67966e+08	2.17708e+08
001686-14-2	10	16	0	1	0	152.24	6.69096e+06	8.58864e+06
001689-82-3	12	10	2	1	0	198.23	2.46132	42.4072	428.15		299.705
001708-29-8	4	6	0	1	0	70.092	5.95178e+08	6.17779e+08
001712-64-7	3	7	1	3	0	105.09	1.92679e+08	2.11891e+08
001730-37-6	14	12	0	0	0	180.25	2905.93	3419.31	358.15		250.705
001731-88-0	14	28	0	2	0	228.38	15827.6	64782.9	279.65		195.755
001758-88-9	10	14	0	0	0	134.22	6.77258e+06	4.9756e+06	219.45		153.615
001759-53-1	4	6	0	2	0	86.091	1.11071e+06	3.85972e+06	291.65		204.155
001759-58-6	7	14	0	0	0	98.19	3.47011e+08	3.30663e+08	139.15		97.405
001795-15-9	14	28	0	0	0	196.38	96509.2	226770	253.15		177.205
001795-16-0	16	32	0	0	0	224.43	12415.9	45444.5	271.45		190.015
001808-26-0	22	36	0	2	0	332.53	12.2204	35.0175
001878-18-8	5	12	0	0	1	104.22	1.121e+08	1.02418e+08
001879-09-0	12	18	0	1	0	178.28	429131	115904	295.45		206.815
001929-77-7	10	21	1	1	1	203.35	113611	18571.1
001942-45-6	8	14	0	0	0	110.2	5.72355e+07	6.80741e+07	172.15		120.505
001982-49-6	14	20	2	1	0	232.33	0.049939	28.3404	408.65		286.055
002004-70-8	5	8	0	0	0	68.12	1.50508e+09	1.50764e+09	185.75		130.025
002008-41-5	11	23	1	1	1	217.38	151808	23355.1
002016-42-4	14	31	1	0	0	213.41	11167.7	9914.88	356.25		249.375
002016-57-1	10	23	1	0	0	157.3	844873	1.08144e+06	290.15		203.105
002027-17-0	13	14	0	0	0	170.26	47388.2	93312.7	287.65		201.355
002032-65-7	11	15	1	2	1	225.31	3.26917	734.958	393.15		275.205
002039-89-6	10	12	0	0	0	132.21	7.10339e+06	4.36858e+06	238.15		166.705
002040-95-1	9	8	0	0	0	126.24	2.49695e+07	2.39083e+07	165.15		115.605
002040-96-2	8	16	0	0	0	112.22	7.44952e+07	7.112e+07	155.85		109.095
002050-20-6	11	20	0	4	0	216.28	36033.5	255722	249.15		174.405
002050-24-0	11	16	0	0	0	148.25	7.99626e+06	2.238e+06	199.05		139.335
002050-92-2	10	23	0	0	0	157.3	1.17739e+06	2.44712e+06	265.3		185.71
002051-30-1	10	0	0	0	0	142.29	1.90242e+07	2.08581e+07
002055-14-3	10	16	0	0	0	164.25	31470.2	253957
002131-18-2	21	36	0	0	0	288.52	111.588	578.087	295.15		206.605
002163-42-0	4	10	0	2	0	90.123	101708	340478	182.15		127.505
002164-08-1	13	18	2	2	0	234.3	0.0188886	0.00381549	589.15		412.405
002189-60-8	14	22	0	0	0	190.33	115742	127807	237.15		166.005
002207-01-4	8	16	0	0	0	112.22	8.73329e+07	9.76393e+07
002207-03-6	8	16	0	0	0	112.22	1.06258e+08	9.34203e+07	183.05		128.135
002207-04-7	8	16	0	0	0	112.22	1.36695e+08	1.16323e+08	236.25		165.375
002210-28-8	7	12	0	2	0	128.17	4.39118e+07	4.1811e+07
002212-67-1	9	17	1	1	1	187.31	56353.5	21031.9
002213-32-3	7	14	0	0	0	98.19	4.98167e+08	4.778e+08	149.05		104.335
002216-33-3	9	20	0	0	0	128.26	4.30784e+07	4.56683e+07	165.55		115.885
002216-34-4	9	20	0	0	0	128.26	4.70528e+07	4.93879e+07	159.85		111.895
002216-51-5	10	20	0	1	0	156.27	534756	64389	316.15		221.305
002217-02-9	10	18	0	1	0	154.25	936463	204696	316.65		221.655
002235-12-3	6	8	0	0	0	80.131	3.87135e+08	4.47729e+08
002274-11-5	6	10	0	4	0	170.17	516976	6.27756e+06
002278-22-0	2	3	1	5	0	121.05	1.90316e+08	1.88181e+08
002312-35-8	19	0	0	4	1	350.48	5.23068	13.6869
002315-68-6	10	22	0	2	0	164.21	1.27344e+06	1.93826e+06	221.55		155.085
002365-48-2	3	6	0	2	1	106.14	1.71127e+07	2.50986e+07
002388-12-7	12	24	0	3	0	216.32	2905.93	191.791
002409-55-4	11	16	0	1	0	164.25	220636	115613	324.65		227.255
002416-94-6	9	12	0	1	0	136.2	253957	151496	331.15		231.805
002425-10-7	10	13	1	2	0	179.22	5567.66	32365.6	352.65		246.855
002425-74-3	9	11	1	1	0	101.15	2.16492e+06	2.61394e+06	289.15		202.405
002426-08-6	9	14	0	2	0	130.19	2.65193e+07	2.17127e+07
002432-74-8	6	12	2	0	0	112.18	1.08488e+06	353792	241.75		169.225
002437-25-4	12	23	1	0	0	181.32	22957.8	61168.8	277.15		194.005
002437-56-1	13	26	0	0	0	182.35	624372	1.02838e+06	260.15		182.105
002438-04-2	10	12	0	0	0	164.21	2467.01	10797.1	337.15		236.005
002439-01-2	10	6	2	1	2	234.3	2.51847	4.77251	443.15		310.205
002439-10-3	15	33	3	2	0	287.45	2.31667	0.0123401	409.15		286.405
002452-99-5	7	1	0	0	0	98.19	2.16092e+08	2.0172e+08	219.15		153.405
002456-27-1	18	38	0	1	0	270.5	763.824	10243.4
002475-44-7	16	14	2	2	0	266.3	0.000286288	0.17893	493.15		345.205
002475-45-8	14	12	4	2	0	268.28	0.259597	7.16775e-05	558.15		390.705
002481-94-9	16	19	3	0	0	253.35	1.14991	227.368	370.15		259.105
002491-52-3	12	9	3	2	0	227.22	14.274	96.3817	406.15		284.305
002491-74-9	14	14	4	2	0	270.29	0.00145297	1.06793	509.15		356.405
002499-59-4	11	20	2	0	0	184.28	983173	828190
002532-58-3	7	14	0	0	0	98.19	3.48857e+08	3.30663e+08	139.45		97.615
002628-17-3	8	8	0	1	0	120.15	90406.7	233766	346.65		242.655
002631-37-0	12	17	1	2	0	207.27	334.182	9769.26	360.15		252.105
002631-40-5	11	15	1	2	0	193.25	218.106	17656.2	367.15		257.005
002655-14-3	10	13	1	2	0	179.22	3467.74	20421.2	372.15		260.505
002655-19-8	16	24	1	2	0	263.38	27.9163	1180.1	376.15		263.305
002686-99-9	11	15	1	2	0	193.25	529.687	9887.48	382.15		267.505
002687-25-4	7	10	2	0	0	122.17	3630.58	58956	336.65		235.655
002691-41-0	4	8	8	8	0	296.16	5.25651e-07	0.383884
002738-19-4	7	14	0	0	0	98.19	2.84676e+08	2.74761e+08	142.75		99.925
002764-72-9	12	14	2	0	0	186.26	0.100093	1481.38
002778-41-8	14	16	2	2	0	244.3	9952.92	1378.7
002778-42-9	14	16	2	2	0	244.3	42017.6	1378.7
002807-30-9	5	12	2	0	0	104.15	1.67737e+07	7.37245e+06
002809-67-8	8	14	0	0	0	110.2	4.43903e+07	5.23283e+07	211.55		148.085
002813-95-8	12	14	2	6	0	282.26	9105.25	261.017	299.15		209.405
002832-40-8	15	15	3	2	0	269.31	0.000723792	0.0068905	468.15		327.705
002855-13-2	10	22	2	0	0	170.3	137225	292746	283.15		198.205
002870-04-4	10	14	0	0	0	134.22	5.32606e+06	4.26892e+06	256.95		179.865
002872-52-8	16	18	4	3	0	314.35	6.75898e-07	0.00246703	434.15		303.905
002883-02-5	15	30	0	0	0	210.41	28026.1	100125	263.15		184.205
002885-00-9	18	38	0	0	1	286.57	6.15627	1060.42	303.15
002889-58-9	13	15	1	1	0	201.27	50513.2	37425.2
002917-26-2	16	34	0	0	1	258.51	143.559	4373.43	292.15
003001-66-9	8	18	0	0	1	146.3	5.59403e+06	6.62326e+06
003010-38-6	14	14	4	2	0	270.29	0.0145297	7.4973	437.15		306.005
003011-34-5	7	8	1	4	0	167.12	8169.43	168.329	414.15		289.905
003025-52-3	16	18	4	2	0	298.35	0.00128291	3.079	425.15		297.605
003048-64-4	9	12	0	0	0	120.2	6.33493e+07	5.03049e+07	193.15		135.205
003073-66-3	9	18	0	0	0	126.24	7.33108e+07	6.25841e+07	207.45		145.215
003173-53-3	7	11	1	1	0	125.17	6.86123e+06	9.5519e+06	193.15		135.205
003173-72-6	12	6	2	2	0	210.19	381.969	391.009	403.65		282.555
003178-22-1	10	20	0	0	0	140.27	1.7563e+07	1.46911e+07	231.95		162.365
003180-09-4	10	14	0	1	0	150.22	82980.5	217945	253.15		177.205
003221-61-2	9	20	0	0	0	128.26	4.28029e+07	4.77348e+07	192.85		134.995
003263-31-8	20	16	4	2	0	384.48	3.70237	0.000736772
003274-20-2	15	10	0	3	0	238.25	0.00087681	14.2165
003347-22-6	14	4	2	2	2	296.33	0.000323355	0.00140811	498.15		348.705
003393-64-4	5	10	0	2	0	102.13	1.23941e+06	2.8872e+06
003404-61-3	7	14	0	0	0	98.19	4.34587e+08	4.36137e+08
003404-65-7	7	14	0	0	0	98.19	4.33379e+08	1.35535e+08
003404-72-6	7	14	0	0	0	98.19	4.27457e+08	4.29281e+08	138.85		97.195
003404-73-7	7	14	0	0	0	98.19	5.48784e+08	5.64289e+08	138.85		97.195
003404-78-2	8	16	0	0	0	112.22	1.5072e+08	1.57308e+08
003452-07-1	20	40	0	0	0	280.54	159.568	6162.73	301.65		211.155
003452-09-3	9	16	0	0	0	124.23	4.17722e+07	3.30975e+07	223.15		156.205
003452-97-9	9	20	0	1	0	144.26	2.32474e+06	821410
003454-07-7	10	12	0	0	0	132.21	6.7127e+06	3.75769e+06	223.45		156.415
003522-94-9	9	20	0	0	0	128.26	1.14067e+08	1.09521e+08	167.45		117.215
003547-33-9	10	22	0	1	1	190.35	6063.17	3220.74	273.15		191.205
003555-18-8	10	13	1	3	0	195.22	48060.9	523.633
003710-84-7	4	11	1	1	0	89.138	1.60924e+07	1.65713e+07	283.15		198.205
003724-65-0	4	6	0	2	0	86.091	1.50409e+06	1.14774e+06	345.15		241.605
003726-45-2	10	20	0	0	0	140.27	9.8694e+06	3.04369e+07	198.15		138.705
003726-47-4	8	16	0	0	0	112.22	3.79208e+07	1.08488e+08
003744-02-3	6	10	0	1	0	98.146	7.95278e+07	8.27975e+07	200.55		140.385
003766-81-2	12	17	1	2	0	207.27	1587.36	33641	304.65		213.255
003769-23-1	7	14	0	0	0	98.19	3.8783e+08	3.90256e+08	131.65		92.155
003875-51-2	8	16	0	0	0	112.22	9.75127e+07	8.61878e+07	161.75		113.225
003877-15-4	4	10	0	0	1	90.188	2.46137e+08	2.18913e+08	160.15
003878-19-1	11	8	2	1	0	184.2	0.0668364	0.0458448	565.15		395.605
003938-95-2	7	14	0	2	0	130.19	1.24525e+08	1.17529e+08	183.65		128.555
003953-10-4	9	16	0	2	0	156.23	1.42714e+07	9.4023e+06	203.15		142.205
004038-04-4	7	14	0	0	0	98.19	4.29698e+08	4.32973e+08	145.65		101.955
004048-33-3	6	15	1	1	0	117.19	15110.8	96331.6	330.15		231.105
004050-45-7	6	12	0	0	0	84.163	7.0246e+08	7.82018e+08	140.15		98.105
004062-60-6	10	24	2	0	0	172.32	2.46208e+06	4.07261e+06
004100-80-5	5	6	0	3	0	114.1	189564	238028	307.15		215.005
004147-51-7	11	21	5	0	1	255.39	21.9559	189.37	378.15
004164-28-7	2	6	2	2	0	90.082	1.7484e+06	1.49655e+06	331.15		231.805
004170-30-3	4	6	0	1	0	70.092	1.13008e+08	1.18659e+08	197.15		138.005
004180-23-8	10	12	0	1	0	148.21	561570	504943	294.45		206.115
004265-25-2	9	8	0	1	0	132.16	3.45935e+06	2.90529e+06
004292-75-5	12	24	0	0	0	168.33	1.03064e+06	1.46459e+06	230.15		161.105
004292-92-6	11	22	0	0	0	154.3	3.08287e+06	3.59668e+06	215.65		150.955
004313-13-7	15	16	4	2	0	284.32	0.15283	10.9121	399.15		279.405
004313-14-8	15	16	4	2	0	284.32	3.05661	38.2076	347.15		243.005
004435-50-1	4	10	0	3	0	106.12	19177.6	24357.1
004442-79-9	8	16	0	1	0	128.22	1.14343e+06	312721	253.15		177.205
004454-05-1	6	10	0	2	0	114.15	6.68687e+07	1.27603e+08	289.15		202.405
004461-48-7	6	12	0	0	0	84.163	9.3571e+08	9.85434e+08	153.15		107.205
004465-58-1	16	13	1	3	0	267.29	0.000143682	0.00255754	441.15		308.805
004516-69-2	8	16	0	0	0	112.22	6.70215e+07	2.12757e+08	130.75		91.525
004553-62-2	6	8	2	0	0	108.14	29640.5	78460.1	228.15		159.705
004630-06-2	8	16	0	1	0	128.22	1.87357e+06	2.14221e+06
004726-14-1	13	19	3	6	1	345.38	0.172661	0.133673	423.15		296.205
004786-20-3	4	5	1	0	0	67.091	1.15355e+08	713890
004920-77-8	7	7	1	3	0	153.14	306285	15478.9	310.15		217.105
005026-76-6	8	16	0	0	0	112.22	1.51926e+08	1.50678e+08
005142-22-3	6	7	5	0	0	149.16	1.28291e-05	7160.27
005142-23-4	6	7	5	0	0	149.16	0.00962186	7160.27
005194-50-3	6	10	0	0	0	82.147	3.6659e+08	3.90525e+08	177.05		123.935
005194-51-4	6	10	0	0	0	82.147	3.87868e+08	3.90525e+08	228.25		159.775
005221-53-4	11	19	3	1	0	209.29	123.717	338.536	375.15		262.605
005234-68-4	12	13	1	2	1	235.31	1.89693	16.0607	364.65		255.255
005259-88-1	12	13	1	4	1	267.31	0.603465	0.563234	393.15		275.205
005315-79-7	16	10	0	1	0	218.26	0.0566624	0.334344	453.15		317.205
005337-93-9	10	12	0	1	0	148.21	746265	454767	280.35		196.245
005341-95-7	4	10	0	2	0	90.123	1.84042e+06	833034	306.15		214.305
005435-64-3	9	18	0	1	0	142.24	611322	1.03161e+07
005454-79-5	7	14	0	1	0	114.19	3.25571e+06	3.15939e+06	267.65		187.355
005458-59-3	11	22	0	2	0	186.3	1.09102e+06	1.43133e+06
005617-41-4	13	16	0	0	0	182.35	370237	553505	243.15		170.205
005836-29-3	19	16	0	3	0	292.34	0.00100252	0.000318985	445.15		311.605
005989-27-5	10	16	0	0	0	136.24	1.44909e+07	1.0612e+07	198.85		139.195
005989-54-8	10	16	0	0	0	136.24	1.05462e+07	1.0612e+07	183.15		128.205
006006-33-3	19	38	0	0	0	266.51	131.034	4852.58	291.65		204.155
006006-95-7	21	42	0	0	0	294.57	5.47255	1202.41	302.15		211.505
006032-29-7	5	12	0	1	0	88.151	2.89345e+07	3.43804e+07	200.15		140.105
006064-63-7	6	12	0	3	0	132.16	22.333	321.073	334.15		233.905
006094-02-6	7	14	0	0	0	98.19	3.21281e+08	3.15369e+08	170.35		119.245
006117-80-2	4	8	0	2	0	88.107	30937.6	25761.6	277.15		194.005
006158-45-8	13	14	0	0	0	170.26	55438.7	94227.5	257.15		180.005
006163-66-2	8	18	0	1	0	130.23	2.27985e+08	2.24564e+08
006175-49-1	12	24	0	1	0	184.32	203975	521819	294.15		205.905
006373-73-5	12	10	4	4	0	274.24	0.000884695	0.176939	461.15		322.805
006423-43-4	3	6	2	6	0	166.09	3.37669e+06	3.37669e+06
006443-92-1	7	14	0	0	0	98.19	2.55565e+08	2.4681e+08
006485-40-1	10	14	0	1	0	150.22	830612	1.04936e+06
006742-54-7	17	28	0	0	0	232.41	3026.3	10374.8	268.15		187.705
006765-39-5	17	34	0	0	0	238.46	5814.66	45851.3	284.65		199.255
006795-87-5	5	12	0	1	0	88.151	9.85477e+08	8.19257e+08	173.15		121.205
006863-58-7	8	18	0	1	0	130.23	1.13681e+08	1.56005e+08	173.15		121.205
006876-23-9	8	16	0	0	0	112.22	1.16745e+08	9.76393e+07	183.15		128.205
006915-15-7	4	6	0	5	0	134.09	0.236521	21.1283	404.15		282.905
006975-98-0	11	24	0	0	0	156.31	5.05374e+06	7.20283e+06	224.25		156.975
006982-25-8	4	10	0	2	0	90.123	881950	833034	280.75		196.525
006988-21-2	11	13	1	4	0	223.23	3.60013	818.429	387.65		271.355
007058-01-7	10	20	0	0	0	140.27	1.7667e+07	1.03214e+07
007132-64-1	16	32	0	2	0	256.43	2242.78	15016.1	291.65		204.155
007145-20-2	8	16	0	0	0	112.22	1.10507e+08	1.04872e+08	158.05		110.635
007154-79-2	9	20	0	0	0	128.26	6.51204e+07	5.44163e+07	263.35		184.345
007287-19-6	10	19	5	0	1	241.36	16.0816	239.928	392.15
007321-55-3	5	6	2	0	0	94.117	7.31455e+06	6.42426e+06	304.65		213.255
007327-60-8	6	6	4	0	0	134.14	2.28589	444.92	399.15		279.405
007443-52-9	7	14	0	1	0	114.19	7.34942e+06	3.53975e+06	252.15		176.505
007443-55-2	7	14	0	1	0	114.19	3.5195e+06	3.15939e+06	272.65		190.855
007443-70-1	7	14	0	1	0	114.19	8.88311e+06	3.53975e+06	280.15		196.105
007525-62-4	10	12	0	0	0	132.21	5.71112e+06	4.20521e+06	172.15		120.505
007642-10-6	7	14	0	0	0	98.19	2.80299e+08	2.7107e+08	136.55		95.585
007688-21-3	6	12	0	0	0	84.163	6.77147e+08	7.82018e+08	175.15		122.605
007696-12-0	19	25	1	4	0	331.42	126.111	0.222654	342.15		239.505
007731-28-4	7	14	0	1	0	114.19	2.01036e+06	2.11035e+06	263.95		184.765
007731-29-5	7	14	0	1	0	114.19	2.38887e+06	2.11035e+06
007756-94-7	12	24	0	0	0	336.65	5.36474e+06	1.19337e+07	197.15		138.005
010004-44-1	4	5	1	2	0	99.09	7298.73	1.53433e+06	359.65		251.755
010233-13-3	15	30	0	2	0	242.41	34901.3	49617.2
010453-86-8	22	26	0	3	0	338.45	0.205535	96.5835	329.65		230.755
010574-37-5	7	14	0	0	0	98.19	2.64847e+08	2.52084e+08	154.85		108.395
010605-21-7	9	9	3	2	0	191.19	0.00770879	0.0559144	573.15		401.205
011039-70-6	10	18	0	1	0	154.25	1.11878e+06	515469
011095-43-5	8	6	0	0	1	134.2	1.72487e+06	713890	304.65
012407-86-2	11	15	1	2	0	193.25	1.79678e+08	9887.48	373.15		261.205
012771-68-5	15	16	2	2	0	256.31	2.75525	1.83224	383.15		268.205
013360-61-7	15	30	0	0	0	210.41	51305.8	195505	270.35		189.245
013389-42-9	8	16	0	0	0	112.22	9.90858e+07	9.16122e+07	185.45		129.815
013475-81-5	10	22	0	0	0	142.29	2.96873e+07	2.47585e+07	219.15		153.405
013684-56-5	16	16	2	4	0	300.32	0.0484322	19.2114	393.15		275.205
013684-63-4	16	16	2	4	0	300.32	0.000161441	10.7197	416.15		291.305
013952-84-6	4	11	1	0	0	73.139	6.98075e+08	6.87468e+08	169.15		118.405
013987-01-4	9	20	0	0	0	384.78	3.25623e+08	7.43918e+07
014686-13-6	7	14	0	0	0	98.19	2.57653e+08	2.4681e+08	163.65		114.555
014686-14-7	7	14	0	0	0	98.19	2.76264e+08	2.7107e+08	136.55		95.585
014850-23-8	8	16	0	0	0	84.163	1.07343e+08	1.02461e+08	179.35		125.545
014901-07-6	13	20	0	1	0	192.3	557939	234541
015022-08-9	7	10	0	3	0	142.16	779435	4.43208e+07
015299-99-7	17	21	1	2	0	271.36	2.50836	42.1462	348.15		243.705
015870-10-7	8	16	0	0	0	112.22	1.21507e+08	1.16926e+08	183.15		128.205
015890-40-1	8	16	0	0	0	112.22	1.93127e+08	1.25967e+08	161.15		112.805
015910-22-2	8	16	0	0	0	112.22	2.61812e+08	2.75439e+08
016409-45-3	12	22	0	2	0	198.31	1.10813e+06	972809
016554-83-9	7	10	0	0	0	94.158	1.15839e+08	7.68888e+07
016645-06-0	2	7	1	1	0	61.084	6.94998e+07	112594	381.15		266.805
016747-25-4	9	20	0	0	0	128.26	7.86831e+07	7.23254e+07
016747-26-5	9	20	0	0	0	128.26	1.09521e+08	9.85003e+07	153.15		107.205
016747-28-7	9	20	0	0	0	128.26	6.77172e+07	6.06156e+07	156.35		109.445
016747-30-1	9	20	0	0	0	128.26	9.20392e+07	8.19688e+07	159.75		111.825
016747-31-2	9	20	0	0	0	128.26	6.11115e+07	5.36586e+07	171.95		120.365
016747-32-3	9	20	0	0	0	128.26	7.79737e+07	7.16366e+07	173.85		121.695
016747-38-9	9	20	0	0	0	128.26	6.0856e+07	5.13855e+07	171.05		119.735
016747-42-5	10	22	0	0	0	142.29	4.59867e+07	4.30218e+07
016752-77-5	5	10	2	2	1	162.21	47.0761	223176	351.15		245.805
017606-31-4	17	21	1	4	4	431.62	36.6459	0.00408208	356.65		249.655
017611-82-4	6	8	2	0	0	108.14	110425	74391.8	232.15		162.505
017618-77-8	7	14	0	0	0	98.19	2.66228e+08	2.72652e+08
017804-35-2	14	18	4	3	0	290.32	0.0577419	0.00942598	413.15		289.205
018281-05-5	22	44	0	2	0	340.59	0.351478	221.389	323.15		226.205
018435-45-5	19	38	0	0	0	266.51	545.522	11666.2	296.15		207.305
018691-97-9	10	11	3	1	1	221.28	1.34389	12.2496	393.15		275.205
018801-00-8	18	18	0	0	0	234.34	8.13467	46.8436	420.15		294.105
019484-26-5	13	28	0	0	1	216.43	8055.24	36963.4
020324-33-8	10	4	0	4	0	206.28	202339	32880.1
020633-11-8	6	13	1	3	0	147.18	1.24987e+07	1.17868e+07
021087-64-9	8	14	4	1	1	214.29	5.0095	59.5382	399.15		279.405
021981-48-6	5	11	1	3	0	133.15	3.67164e+07	3.78616e+07
022699-70-3	10	9	0	4	0	148.21	2.36386e+07	867232	253.15		177.205
022781-23-3	11	13	1	4	0	223.23	414.014	928.832	403.15		282.205
023103-98-2	11	18	4	2	0	238.29	93.2395	1434.45	363.65		254.555
023436-19-3	7	16	0	2	0	132.2	9.2344e+06	4.09865e+06
023564-05-8	12	14	4	4	2	342.4	1.31222	0.182386	445.15		311.605
023947-60-6	11	19	3	1	0	209.29	22.4941	40.2644	433.15		303.205
024347-58-8	4	10	0	2	0	90.123	2.66377e+06	833034
024579-73-5	9	20	2	2	0	188.27	554409	270122
024691-80-3	12	11	1	2	0	201.23	1.62248	70.6319	382.65		267.855
024910-63-2	7	14	0	0	0	98.19	3.56377e+08	3.55449e+08	148.95		104.265
025013-15-4	9	10	0	0	0	354.54	9.525e+06	1.23825e+07	186.85		130.795
025057-89-0	10	12	2	3	1	240.28	44.5576	3.3063	411.15		287.805
025154-52-3	15	24	0	1	0	220.36	279.4	8121.54
025155-15-1	10	14	0	0	0	134.22	1.18261e+07	8.22056e+06	205.15		143.605
025264-93-1	6	12	0	0	0	84.163	7.8012e+08	7.82018e+08	175.15		122.605
025265-71-8	6	14	0	3	0	134.18	230031	52640.4
025265-77-4	12	24	0	3	0	216.32	116237	55561.4
025321-09-9	12	18	0	0	0	486.83	2.23176e+06	2.842e+06	233.15		163.205
025339-17-7	10	22	0	1	0	158.29	175833	173452	278.15		194.705
025340-18-5	12	18	0	0	0	486.83	2.11319e+06	1.26408e+06
025360-10-5	9	20	0	0	1	160.32	4.58061e+06	5.62244e+06	230
025376-45-8	7	10	2	0	0	610.86	9401.44	3735.63
025498-49-1	10	22	0	4	0	206.28	66402.7	58753.6	195.35		136.745
025550-14-5	9	12	0	0	0	360.59	1.86109e+07	1.4788e+07
025551-13-7	9	1	0	0	0	360.59	1.23179e+07	1.179e+07
025640-78-2	15	16	0	0	0	196.29	5273.73	8627.82
026002-80-2	23	26	0	3	0	350.46	2.69337	36.1627
026225-79-6	12	18	0	5	1	286.35	72.2501	128.281	344.15		240.905
026259-45-0	10	19	5	1	0	225.3	88.3887	1086.09	360.15		252.105
026471-62-5	9	6	2	2	0	174.16	215362	241580	293.15		205.205
026519-91-5	6	8	0	0	0	80.131	5.3383e+08	5.51051e+08
026530-20-1	11	19	1	1	1	213.34	421.812	2292.46
026635-64-3	8	18	0	0	0	114.23	3.16074e+08	2.76063e+08	168.15		117.705
026761-40-0	28	46	0	4	0	446.68	12.6628	5.49619	227.55		159.285
026763-63-3	13	12	2	1	0	424.51	85.9058	796.311	512.15		358.505
026856-30-4	6	10	0	0	0	246.44	6.00129e+08	6.00129e+08	141.25		98.875
026952-21-6	8	18	0	1	0	130.23	2.40654e+06	1.05636e+06	155.95		109.165
027138-19-8	12	12	0	0	0	468.69	438214	144392
027138-31-4	20	22	0	5	0	342.4	8.46595	96.0701
027196-00-5	14	30	0	1	0	214.39	118.616	2395.35	311.15		217.805
027215-95-8	9	18	0	0	0	504.98	2.54269e+07	3.55299e+07
027519-02-4	23	46	0	0	0	322.62	611.677	1098.59
027554-26-3	24	38	0	4	0	390.57	115.43	1.26343e+06
028106-30-1	10	12	0	0	0	396.62	6.17284e+06	3.75769e+06
028434-01-7	22	26	0	3	0	338.45	2546.46	96.5835	305.15		213.605
028553-12-0	26	42	0	4	0	418.62	12.1468	5.17363
029253-36-9	13	14	0	0	0	340.51	338670	94227.5
029316-05-0	11	16	0	0	0	148.25	4.90926e+06	2.87515e+06	203.15		142.205
029973-13-5	11	15	1	2	1	225.31	85.3617	5412.3	306.55		214.585
032210-23-4	12	22	0	2	0	198.31	79913.1	729873	223.15		156.205
033089-61-1	19	23	3	0	0	293.42	31.5347	40.9952	359.15		251.405
033629-47-9	14	21	3	4	0	295.34	201.612	88.265	333.15		233.205
033693-04-8	10	19	5	1	0	225.3	24.2161	588.451	396.65		277.655
033820-53-0	15	23	3	4	0	309.37	498.852	4.85549
033956-49-9	12	22	0	1	0	182.31	5073.33	3427.92	305.15		213.605
034014-18-1	9	16	4	1	1	228.32	24.539	5.37404	436.15		305.305
034123-59-6	12	18	2	1	0	206.29	0.273814	87.2436	431.15		301.805
034590-94-8	7	16	0	3	0	148.2	4.38042e+06	1.17873e+06
034681-10-2	7	14	2	2	1	190.27	812.854	236188	298.15		208.705
034681-23-7	7	14	2	4	1	222.26	23.8932	2245.96	360.15		252.105
035256-85-0	15	23	1	1	0	233.36	8375.75	5755.2
035296-72-1	4	10	0	1	0	148.25	2.66808e+07	8.20334e+07
036653-82-4	16	34	0	1	0	242.45	78.1373	116.294	322.45		225.715
038640-62-9	16	20	0	0	0	212.34	5704.24	6457.19
038888-98-1	14	14	0	0	0	182.27	168458	78352.5
039196-18-4	9	18	2	2	1	218.32	1994.33	33669	330.15		231.105
039300-45-3	18	24	2	6	0	364.4	0.783525	0.0667955
039393-37-8	26	42	0	4	0	725.03	109.771	8.7277
039515-40-7	24	25	1	3	0	375.47	18.1621	2.07855
039515-41-8	22	23	1	3	0	349.43	102.919	58.7843	320.15		224.105
040487-42-1	13	19	3	4	0	281.31	453.648	3054.56	329.15		230.405
040596-69-8	19	34	0	3	0	310.48	393.7	3953.68
041205-09-8	17	30	0	2	0	266.43	3492.71	14071.1
041394-05-2	10	10	4	1	0	202.22	0.0701137	8.08753	440.05		308.035
041483-43-6	13	24	4	3	1	316.43	12.7538	16.2569	323.15		226.205
041814-78-2	9	7	3	0	1	189.24	2.03415	1495.1	460.15
042154-69-8	7	14	0	0	0	98.19	4.01336e+08	4.02913e+08
042588-37-4	18	28	2	0	0	276.42	105.242	5488.98
042609-52-9	17	20	2	1	0	268.36	0.0488907	0.747061	476.15		333.305
050512-35-1	12	18	4	2	0	290.4	192383	2488.88	327.15		229.005
050623-57-9	13	26	0	2	0	214.35	246790	173893	235.15		164.605
051235-04-2	12	20	4	2	0	252.32	3.05123	8.90958	389.15		272.405
051707-55-2	9	8	4	1	1	220.25	0.000272297	0.311365	484.15		338.905
052251-71-5	16	14	0	0	0	206.29	58.0885	68.5089	425.15		297.605
052570-16-8	19	17	1	2	0	291.35	0.000328855	0.146888	401.15		280.805
052888-80-9	14	21	1	1	1	251.39	6.99673	652.398
053112-28-0	12	13	3	0	0	199.26	176.697	1103.02	369.45		258.615
053535-33-4	7	16	0	1	0	348.61	1.46321e+06	1.86647e+06
054406-48-3	18	26	0	0	0	274.41	1367.4	32296.7
055285-14-8	20	32	2	3	1	380.55	6.27789	16.3184
055290-64-7	6	10	0	4	2	210.27	4.32822	82.6092
055505-26-5	10	22	0	1	0	158.29	175747	173452
055814-41-0	17	19	1	2	0	269.35	6.07985	4.96521
055861-78-4	10	17	3	2	0	211.27	4.34883	365.62	438.15		306.705
057052-04-7	12	20	4	1	1	268.38	5.04771	7.77347	432.45		302.715
057369-32-1	11	11	1	1	0	173.22	11.1717	644.234	385.15		269.605
057646-30-7	17	19	1	4	0	301.35	8.50388	34.9874	343.15		240.205
057837-19-1	15	21	1	4	0	279.34	84.3786	427.898	344.15		240.905
057875-61-3	14	6	2	6	0	298.21	0.000112255	0.000477886	614.15		429.905
057966-95-7	7	10	4	3	0	198.18	12.0402	0.235477	433.65		303.555
059669-26-0	10	18	4	4	3	354.47	1333.5	3.81	446.15		312.305
061432-55-1	15	21	1	1	1	263.4	56.6118	338.256	312.15		218.505
061676-87-7	12	14	2	0	1	218.32	211.164	4235.02	317.15
062308-10-5	13	12	4	2	0	256.27	0.00982523	2.83791
062850-32-2	13	19	1	2	1	253.37	17.0185	464.266	313.65		219.555
063278-33-1	10	7	3	1	0	185.19	3.47447e+06	632.175	328.15		229.705
063837-33-2	18	20	4	0	0	300.36	12.9637	177.563
064257-84-7	22	23	1	3	0	349.43	102.919	58.7843	320.15		224.105
064529-56-2	9	16	4	1	1	228.32	92.0212	71.2857	368.15		257.705
065907-30-4	18	26	2	5	1	382.48	0.602313	35.9744
066215-27-8	6	10	6	0	0	166.19	0.030015	10.3623	498.05		348.635
067306-00-7	19	31	1	0	0	273.47	1880.46	3217.35
067306-03-0	20	33	1	1	0	303.49	407.638	1214.76
067564-91-4	20	33	1	1	0	303.49	428.835	1214.76
068137-08-6	7	7	1	3	0	153.14	642211	14984.9
068505-69-1	12	16	0	4	1	256.32	287.924	898.213
068609-97-2	16	32	0	2	0	254.46	826576	29205.7
069327-76-0	16	23	3	1	1	305.45	154.283	13.8691	378.15		264.705
070585-36-3	20	23	3	2	0	337.43	2.9923e-05	0.00255706	411.75		288.225
070630-17-0	15	21	1	4	0	279.34	372.347	427.898	234.45		164.115
071626-11-4	20	23	1	3	0	325.41	174.894	5.1069	352.15		246.505
072490-01-8	17	15	1	4	0	301.35	0.103887	70.803	326.65		228.655
072963-72-5	17	22	2	4	0	318.38	0.231022	2.68669
073250-68-7	16	14	2	2	1	298.37	0.0769749	0.458642	407.95		285.565
074051-80-2	17	29	1	3	1	327.49	2.81552	0.198846
074754-55-5	6	11	1	5	0	177.16	142.875	11239.5
074782-23-3	12	12	2	3	0	232.24	49.6893	270.919	350.85		245.595
077732-09-3	14	18	2	4	0	278.31	0.371012	2.60307	377.15		264.005
079127-80-3	17	19	1	4	0	301.35	0.0971873	71.7566	326.15		228.305
079277-27-3	12	13	5	6	2	387.4	0.00266571	0.000293644	449.15		314.405
081405-85-8	16	20	2	3	0	288.35	0.175131	0.017978	406.15		284.305
082558-50-7	18	24	2	4	0	332.4	0.073787	0.0764669	450.65		315.455
082560-54-1	20	30	2	5	1	410.54	4.41271	15.3342
083055-99-6	16	18	4	7	1	410.41	4.63335e-07	0.000110097	460.15		322.105
083130-01-2	17	25	3	4	2	399.53	0.751506	5.77586	320.15		224.105
084852-15-3	15	21	0	1	0	220.36	1100.02	3841.91
085785-20-2	15	23	1	1	1	265.42	108.095	785.758
087130-20-9	14	21	1	4	0	267.33	905.198	479.898	373.45		261.415
087818-31-3	18	26	0	2	0	274.41	1116.19	14391
087820-88-0	20	27	1	3	0	329.44	0.0492189	0.00656843	379.15		265.405
089269-64-7	15	18	0	4	0	254.34	0.434254	13.0417	448.65		314.055
092245-57-3	14	14	2	2	0	242.28	0.275304	1.23717
095266-40-3	13	16	5	0	0	252.27	210.971	1.64088	309.15		216.405
095737-68-1	20	19	1	3	0	321.38	37.6576	23.6656	319.15		223.405
101200-48-0	15	17	5	6	1	395.4	0.00828998	0.000559042	414.15		289.905
101205-02-1	17	27	1	3	1	325.47	1.31171	0.0669844	314.15		219.905
101903-30-4	18	23	3	4	0	345.4	90.2292	0.963558
104273-73-6	11	12	0	5	0	224.22	0.208538	14826.7	417.55		292.285
110235-47-7	14	13	3	0	0	223.28	2.08807	84.603	405.95		284.165
111578-32-6	22	28	2	5	0	400.48	398.22	0.0322881	375.15		262.605
111812-58-9	24	27	3	4	0	421.5	1.2755	0.0586777	375.15		262.605
112143-82-5	13	22	4	3	1	314.41	2.02769	26.191	326.15		228.305
112410-23-8	22	28	2	2	0	352.48	0.426203	0.00195106	464.15		324.905
118134-30-8	18	35	1	2	0	297.49	2045.78	3867.79
120162-55-2	13	16	10	5	1	424.4	0.000684508	3.85606e-06	443.15		310.205
120923-37-7	9	15	5	7	2	369.38	3.27644	0.0010564	434.65		304.255
120928-09-8	20	22	2	1	0	306.41	0.419907	11.9715	351.65		246.155
121552-61-2	14	15	3	0	0	225.3	44.5576	481.9	349.05		244.335
122931-48-0	14	17	5	7	2	431.45	0.262088	7.51474e-06	450.15		315.105
125306-83-4	16	22	4	3	1	350.44	0.000421898	0.0561275	388.15		271.705
126801-58-9	15	18	4	7	1	398.4	10.6018	0.000726063	418.15		292.705
131807-57-3	22	18	2	4	0	374.4	0.0966061	0.000192407	414.15		289.905
131860-33-8	22	17	3	5	0	403.4	1.78917e-05	0.010735	389.15		272.405
133408-50-1	16	16	2	3	0	284.32	2.06321	1.75755	361.15		252.805
135158-54-2	8	6	2	1	2	210.28	37.2928	10329	406.05		284.235
136191-64-5	17	19	3	6	0	361.36	4.46814	1.43757	380.15		266.105
136849-15-5	17	19	5	6	1	421.43	3.73816	3.26239e-05	435.05		304.535
138164-12-2	24	33	1	4	0	399.53	0.161037	0.00011337	353.95		247.765
143390-89-0	18	19	1	4	0	313.36	0.289711	21.223	372.15		260.505
149877-41-8	17	20	2	3	0	300.36	1.2108	5.50513	395.15		276.605
SMILES	#C	#H	#N	#O	#S	Molar mass (g/mol)	Measured C0 (μg/m3)	Estimated C0 (μg/m3)	Measured Tm (K)	Estimated Tm (K)	Estimated Tg (K)	Data source
CS(S)(=O)=O	1	4	0	2	2	112.173		2.55342e+06		280.93	196.651	Li, Y., Pöschl, U. and Shiraiwa, M.: Molecular corridors and parameterizations of volatility in the chemical evolution of organic aerosols, Atmos. Chem. Phys., 16, 3327-3344, 10.5194/acp-16-3327-2016, 2016.
CS(O)(=O)=O	1	4	0	3	1	96.1068		138088	293.15	298.92	205.205
OCS(O)(=O)=O	1	4	0	4	1	112.106		587.598		340.32	238.224
COS(O)(=O)=O	1	4	0	4	1	112.106		47900.7		315.69	220.983
OS(=O)(=O)CS(O)(=O)=O	1	4	0	6	2	176.171		0.496772	371.15	417.71	259.805
COC(S)=S	2	4	0	1	2	108.185		1.31573e+07		251.96	176.372
OC(=O)CS	2	4	0	2	1	92.1184	430286	2.05725e+06	256.65	291.99	179.655
OC(=O)CS	2	4	0	2	1	92.1184		2.05725e+06	262.15	278.77	183.505
O=S1OCCO1	2	4	0	3	1	108.118		7.85457e+06	262.15	278.77	183.505
OS(=O)(=O)C=C	2	4	0	3	1	108.118		39680.1		308.73	216.111
OC(=O)CS(O)(=O)=O	2	4	0	5	1	140.117		39.3597	358.15	384.98	250.705
OC(=O)CS(O)(=O)=O	2	4	0	5	1	140.117		39.3597	358.15	384.98	250.705
CS(C)=O	2	6	0	1	1	78.1348	2.56487e+06	2.61533e+06	291.65	223.44	204.155
OCCS	2	6	0	1	1	78.1348	7.40029e+06	3.62026e+06		227.56	159.292
CSS(C)(=O)=O	2	6	0	2	2	126.2		1.93551e+06		287.86	201.502
CCS(O)(=O)=O	2	6	0	3	1	110.134		49191.4	256.15	310.01	179.305
COS(=O)OC	2	6	0	3	1	110.134		7.11201e+07		259.01	181.307
COS(C)(=O)=O	2	6	0	3	1	110.134		1.83727e+06	293.15	270.83	205.205
OCCS(O)(=O)=O	2	6	0	4	1	126.133		597.314		350.03	245.021
OS(=O)(=O)CCS(O)(=O)=O	2	6	0	6	2	190.198		0.0358233	446.15	418.39	312.305
O[CH]([CH](O)S(O)(=O)=O)S(O)(=O)=O	2	6	0	8	2	222.197		8.34612e-05		466.76	326.732
OS(=O)(=O)CC(S(O)(=O)=O)S(O)(=O)=O	2	6	0	9	3	270.262		4.34858e-07		495.62	346.934
O=C1OCCS1	3	4	0	2	1	104.129		1.08709e+06		274.49	192.143
CCOC(S)=S	3	6	0	1	2	122.212		5.39943e+06		263.76	184.632
CCOC(S)=S	3	6	0	1	2	122.212		5.39943e+06		263.76	184.632
CCOC(S)=S	3	6	0	1	2	122.212		5.39943e+06		263.76	184.632
CCOC(S)=S	3	6	0	1	2	122.212		5.39943e+06		263.76	184.632
SCCOC(S)=S	3	6	0	1	3	154.278		212537		301.3	210.91
OC(=O)CCS	3	6	0	2	1	106.145	284460	885368	291.15	303.34	203.805
OC(=O)CCS	3	6	0	2	1	106.145		885368
OC(=O)CCS	3	6	0	2	1	106.145		885368
O=S1(=O)CCOC1	3	6	0	3	1	122.145		1.77472e+06		298.65	213.255
O=S1(=O)CCCO1	3	6	0	3	1	122.145		1.57095e+06	304.65	298.65	209.055
OS(=O)(=O)OCC=C	3	6	0	4	1	138.144		3114.85		335.83	235.081
O=S1(=O)CSCS(=O)(=O)C1	3	6	0	4	3	202.276		251.448		398.34	278.838
OC(=O)CCS(O)(=O)=O	3	6	0	5	1	154.143		8.295		393.17	275.219
CS(=O)(=O)OCC(O)=O	3	6	0	5	1	154.143		4686.68		363.37	254.359
O=S1(=O)CS(=O)(=O)CS(=O)(=O)C1	3	6	0	6	3	234.275		8.96369		428.5	299.95
CSCCO	3	8	0	1	1	92.1616		4.7314e+06		234.73	164.311
OCCCS	3	8	0	1	1	92.1616		2.26155e+06		239.53	167.671
OC[CH](S)CS	3	8	0	1	2	124.228	33425.6	98271.4		266.96	186.872
OC[CH](S)CS	3	8	0	1	2	124.228		98271.4
OC[CH](S)CS	3	8	0	1	2	124.228		98271.4
OC[CH](S)CS	3	8	0	1	2	124.228		98271.4
OC[CH](S)CS	3	8	0	1	2	124.228		98271.4
OC[CH](S)CS	3	8	0	1	2	124.228		98271.4
OC(CS)CS	3	8	0	1	2	124.228		143062
OC[CH](S)CS	3	8	0	1	2	124.228		98271.4
OC[CH](O)CS	3	8	0	2	1	108.161		58787.3		278.9	195.23
CC(C)S(O)(=O)=O	3	8	0	3	1	124.16		35144.7	236.15	310.24	165.305
CCOS(C)(=O)=O	3	8	0	3	1	124.16	1.37639e+06	1.22272e+06		282.56	197.792
CCCOS(O)(=O)=O	3	8	0	4	1	140.16		2843.52		337.06	235.942
CC(C)(O)S(O)(=O)=O	3	8	0	4	1	140.16		474.423		349.92	244.944
CC(C)(O)S(O)(=O)=O	3	8	0	4	1	140.16		474.423
C[CH](CO)S(O)(=O)=O	3	8	0	4	1	140.16		141.045		351.06	245.742
CS(=O)(=O)CS(C)(=O)=O	3	8	0	4	2	172.226		6719.36		354.78	248.346
O[CH](C[CH](O)S(O)(=O)=O)S(O)(=O)=O	3	8	0	8	2	236.223		3.21614e-05		472.18	330.526
CSCCCO	4	10	0	1	1	106.188		1.60002e+06		246.6	172.62
SCCOCCS	4	10	0	1	2	138.254		2.07575e+06		254.62	178.234
OCCSCCO	4	10	0	2	1	122.188	21238.4	1591.24	262.95	298.02	184.065
CCSS(=O)(=O)CC	4	10	0	2	2	154.254		255669		310.1	217.07
OCCSSCCO	4	10	0	2	2	154.254		796.06	299.15	328.8	209.405
OCCOSCCO	4	10	0	3	1	138.187		3390.97		314.31	220.017
CCCCS(O)(=O)=O	4	10	0	3	1	138.187		6551.42	257.95	331.4	180.565
CCOS(=O)OCC	4	10	0	3	1	138.187		2.05243e+07		282.04	197.428
CC(C)(C)S(O)(=O)=O	4	10	0	3	1	138.187		2625.03	386.15	320.89	270.305
CC(C)(C)S(O)(=O)=O	4	10	0	3	1	138.187		2625.03		294.03	205.821
CCCOS(C)(=O)=O	4	10	0	3	1	138.187		1.78472e+06
CC(C)COS(O)(=O)=O	4	10	0	4	1	154.187		2082.63		337.08	235.956
CCCCOS(O)(=O)=O	4	10	0	4	1	154.187		1053.76		340.51	238.357
OCCS(=O)(=O)CCO	4	10	0	4	1	154.187		49.8669		364.57	255.199
C[CH](CO)CS(O)(=O)=O	4	10	0	4	1	154.187		48.9542		360.28	252.196
OCCS(=O)(=O)CCO	4	10	0	4	1	154.187		49.8669		364.57	255.199
CSCC[CH](O)S(O)(=O)=O	4	10	0	4	2	186.253		3.85882		384.1	268.87
CS(=O)(=O)CCS(C)(=O)=O	4	10	0	4	2	186.253		2706.19		363.96	254.772
CS(=O)(=O)OCCOS(C)(=O)=O	4	10	0	6	2	218.251		416.943		387.03	270.921
O[CH](CC[CH](O)S(O)(=O)=O)S(O)(=O)=O	4	10	0	8	2	250.25		1.22952e-05		477.6	334.32
SC(=S)OCC=C	4	6	0	1	2	134.223		2.34748e+06		273.98	191.786
CC(=O)SC(C)=O	4	6	0	2	1	118.156		5.86881e+06		267.11	186.977
C=CS(=O)(=O)C=C	4	6	0	2	1	118.156		392949	247.15	274.19	173.005
O=S1(=O)CC=CC1	4	6	0	2	1	118.156		845668	337.65	290.58	236.355
SC(=S)OCCOC(S)=S	4	6	0	2	4	214.354		812.075		371.82	260.274
O=S1(=O)C[CH]2O[CH]2C1	4	6	0	3	1	134.156		823010		307.88	215.516
OC(=O)C[CH](S)C(O)=O	4	6	0	4	1	150.155		265.844	422.15	380.03	295.505
OC(=O)C[CH](S)C(O)=O	4	6	0	4	1	150.155		265.844
OC(=O)CSCC(O)=O	4	6	0	4	1	150.155		441.188	402.15	383.28	281.505
OC(=O)CSCC(O)=O	4	6	0	4	1	150.155		441.188
OC(=O)C[CH](S)C(O)=O	4	6	0	4	1	150.155		265.844	422.15	380.03	295.505
OC(=O)[CH](S)[CH](S)C(O)=O	4	6	0	4	2	182.221		0	466.15	400.64	326.305
OC(=O)[CH](S)[CH](S)C(O)=O	4	6	0	4	2	182.221		0
CSCCC=O	4	8	0	1	1	104.173		1.10997e+07		229.62	160.734
C1CSCCO1	4	8	0	1	1	104.173		2.58432e+07		245.08	171.556
CC(C)OC(S)=S	4	8	0	1	2	136.239		4.03965e+06		264.27	184.989
CC(C)OC(S)=S	4	8	0	1	2	136.239		4.03965e+06
CC(C)OC(S)=S	4	8	0	1	2	136.239		4.03965e+06
CCOC(=S)SC	4	8	0	1	2	136.239		4.02498e+06		270.75	189.525
CC(C)OC(S)=S	4	8	0	1	2	136.239		4.03965e+06		264.27	184.989
CCOC(=O)CS	4	8	0	2	1	120.172		1.86893e+07		232.86	163.002
O=S1CCOCC1	4	8	0	2	1	120.172		1.31278e+06		279.74	195.818
O=S1CCOCC1	4	8	0	2	1	120.172		1.31278e+06
O=S1(=O)CCCC1	4	8	0	2	1	120.172	40094.7	26449.5	300.75	289.44	210.525
CC(=C)CS(O)(=O)=O	4	8	0	3	1	136.171		5781.69		321.85	225.295
OCCS(=O)(=O)C=C	4	8	0	3	1	136.171		8500.32		326.55	228.585
CC(=O)CS(C)(=O)=O	4	8	0	3	1	136.171		576703		305.73	214.011
O=S1(=O)CCOCC1	4	8	0	3	1	136.171		60748	405.15	308.66	283.605
C[CH]1COS(=O)(=O)C1	4	8	0	3	1	136.171		850032		306.19	214.333
O[CH]1CCC[CH]1S	5	10	0	1	1	118.199		351748		264.54	185.178
CCSCCC=O	5	10	0	1	1	118.199		8.52338e+06		241.54	169.078
O[CH]1CCC[CH]1S	5	10	0	1	1	118.199		351748		264.54	185.178
CC[CH](C)OC(S)=S	5	10	0	1	2	150.265		1.64961e+06		275.7	192.99
CCOC(=S)SCC	5	10	0	1	2	150.265		1.64961e+06		282.18	197.526
CC[CH](C)OC(S)=S	5	10	0	1	2	150.265		1.64961e+06		275.7	192.99
CC(C)(C)OC(S)=S	5	10	0	1	2	150.265		2.44207e+06		282.14	197.498
C1CSCSCCO1	5	10	0	1	2	150.265		938012		302.41	211.687
CCOC(=O)CCS	5	10	0	2	1	134.199		7.0195e+06		244.7	171.29
CSCC[CH](O)C(O)=O	5	10	0	3	1	150.198		721.785		347.97	243.579
C[CH]1CCOS(=O)(=O)C1	5	10	0	3	1	150.198		274003		316	221.2
CS(=O)(=O)C1(CC1)S(C)(=O)=O	5	10	0	4	2	198.264		1184.29		381.11	266.777
CCOC(=O)COS(C)(=O)=O	5	10	0	5	1	182.197		54513.9		330.46	231.322
OCC(CS)(CS)CS	5	12	0	1	3	184.347		375.982		329.43	230.601
OCCCSCCO	5	12	0	2	1	136.215		3928.98		308.64	216.048
OCCSCSCCO	5	12	0	2	2	168.281		137.648		338.66	237.062
CC(C)CCS(O)(=O)=O	5	12	0	3	1	152.214		2424.59		331.42	231.994
CC(C)(C)CS(O)(=O)=O	5	12	0	3	1	152.214		3661.45		331.22	231.854
CC(C)(C)CS(O)(=O)=O	5	12	0	3	1	152.214		3661.45
CC(C)(C)CS(O)(=O)=O	5	12	0	3	1	152.214		3661.45
CCCCOS(C)(=O)=O	5	12	0	3	1	152.214		601232		305.24	213.668
CCCCCOS(O)(=O)=O	5	12	0	4	1	168.213		353.034		350.12	245.084
OCCCCCS(O)(=O)=O	5	12	0	4	1	168.213		8.84396
CCS(=O)(=O)CS(=O)(=O)CC	5	12	0	4	2	200.279		1131.66		372.74	260.918
CS(=O)(=O)OCCCOS(C)(=O)=O	5	12	0	6	2	232.278		191.246		395.04	276.528
COS(=O)(=O)CCCS(=O)(=O)OC	5	12	0	6	2	232.278		191.246		395.04	276.528
O[CH](CCC[CH](O)S(O)(=O)=O)S(O)(=O)=O	5	12	0	8	2	264.277		4.66471e-06		483.02	338.114
O=CC1=CC=CS1	5	4	0	1	1	112.152		2.52879e+06		282.97	198.079
OC(=O)C1=CC=CS1	5	4	0	2	1	128.151		10896.1	402.65	335.95	281.855
OC(=O)C1=CC=C(O1)S(O)(=O)=O	5	4	0	6	1	192.149		0.318479		423.64	296.548
OC(=O)C1=CC=C(O1)S(O)(=O)=O	5	4	0	6	1	192.149		0.318479
SCC1=CC=CO1	5	6	0	1	1	114.168		1.26562e+07		246.84	172.788
OC(=O)CSC(=S)SCC(O)=O	5	6	0	4	3	226.298		2.19202		441.06	308.742
OC(=O)COC(=S)SCC(O)=O	5	6	0	5	2	210.231		9.1864		428.72	300.104
O=C1CCSCC1	5	8	0	1	1	116.184		3.35746e+06		287.49	201.243
COC(=S)SCC=C	5	8	0	1	2	148.25		1.74715e+06		280.88	196.616
CC1=CCS(=O)(=O)C1	5	8	0	2	1	132.183		867815		300.88	210.616
COC(=S)SCSC(=S)OC	5	8	0	2	4	228.381		959.848		373.21	261.247
O=S1OCC2(CO1)COS(=O)OC2	5	8	0	6	2	228.247		37.8309		408.87	286.209
CCOC(=S)SCC=C	6	10	0	1	2	162.276		722192		292.06	204.442
C=CCS(=O)(=O)CC=C	6	10	0	2	1	146.21		849751		296.97	207.879
CC1(C)CS(=O)(=O)CC1=O	6	10	0	3	1	162.209		30027.9		341.87	239.309
COC(=O)CCSC(C)=O	6	10	0	3	1	162.209		826641		287.83	201.481
CC(C)OC(=S)SCC(O)=O	6	10	0	3	2	194.275		1589.1		368.6	258.02
CCOC(=S)SCCC(O)=O	6	10	0	3	2	194.275		871.917		375.84	263.088
COC(=O)C[CH](S)C(=O)OC	6	10	0	4	1	178.209		2.7907e+06
OC(=O)CCSCCC(O)=O	6	10	0	4	1	178.209		137.138	402.15	399.77	281.505
CCS[CH](CC(O)=O)C(O)=O	6	10	0	4	1	178.209		254.136		392.89	275.023
CC(=O)OCCS(=O)(=O)C=C	6	10	0	4	1	178.209		58019.7		331.1	231.77
OC(=O)CCSSCCC(O)=O	6	10	0	4	2	210.275		18.8971		414.64	290.248
SCC(=O)OCCOC(=O)CS	6	10	0	4	2	210.275		70835.8
OC(=O)CCS(=O)(=O)CCC(O)=O	6	10	0	6	1	210.207		4.42299		437.09	305.963
CS[CH]1CCC[CH]1O	6	12	0	1	1	132.226		244775		271.43	190.001
C[CH]1CSC[CH](C)O1	6	12	0	1	1	132.226		1.19541e+07		261.2	182.84
CCC[CH]1OCCS1	6	12	0	1	1	132.226		9.74832e+06		266.31	186.417
CCSCCOC=C	6	12	0	1	1	132.226		1.70773e+07		232.85	162.995
CC(C)SC[CH]1CO1	6	12	0	1	1	132.226		1.94255e+07		236.57	165.599
CCCCCOC(S)=S	6	12	0	1	2	164.292		383706		297.57	208.299
CC(C)(C)COC(S)=S	6	12	0	1	2	164.292		999049		293.41	205.387
CC(C)CCOC(S)=S	6	12	0	1	2	164.292		682536		286.86	200.802
CCCSC(=S)OCC	6	12	0	1	2	164.292		679884		293.35	205.345
CCOC(=S)SC(C)C	6	12	0	1	2	164.292		1.22008e+06		282.54	197.778
CCOC(=S)SCCSC	6	12	0	1	3	196.358		34341.9		324.93	227.451
O[CH](CC=C([CH](O)S(O)(=O)=O)[CH](O)S(O)(=O)=O)S(O)(=O)=O	6	12	0	12	3	372.352		5.59048e-13		566.59	396.613
CCCSCCC(O)=O	6	12	0	2	1	148.226		71310.3		325.03	227.521
CC(C)SCCC(O)=O	6	12	0	2	1	148.226		132411		321.33	224.931
CCSCCOC(C)=O	6	12	0	2	1	148.226		5.18475e+06		251.71	176.197
CCSCCC(=O)OC	6	12	0	2	1	148.226		5.18475e+06
COC(=O)CCSCCO	6	12	0	3	1	164.225		15200.5		302.62	211.834
C[CH]1CC(C)(C)S(=O)(=O)O1	6	12	0	3	1	164.225		240381		322.26	225.582
CC1S(=O)C(C)S(=O)C(C)S1=O	6	12	0	3	3	228.357		15.1151		406.8	284.76
CC(C)(CS(C)(=O)=O)C(O)=O	6	12	0	4	1	180.224		2075.48		372.98	261.086
CC(C)COC(=O)CS(O)(=O)=O	6	12	0	5	1	196.224		69.6927		364.28	254.996
CS(=O)(=O)O[CH](C=O)[CH](O)[CH](O)CO	6	12	0	7	1	228.223		0.0273877		420.96	294.672
CS(=O)(=O)OCCOC(=O)COS(C)(=O)=O	6	12	0	8	2	276.288		16.2062		417.04	291.928
CC(C)(C)SCCO	6	14	0	1	1	134.242		600317		265.06	185.542
CCCCSCCO	6	14	0	1	1	134.242		182768		269.55	188.685
CCCS(=O)(=O)CCC	6	14	0	2	1	150.241	33310.3	69692.9	302.65	299.55	211.855
C[CH](O)CSC[CH](C)O	6	14	0	2	1	150.241		14148.8		295.04	206.528
OCCCSCCCO	6	14	0	2	1	150.241		1204.67		318.99	223.293
OCC[S+](CCO)CCO	6	14	0	3	1	166.241		8.21243		355.5	248.85
CCCCCOS(C)(=O)=O	6	14	0	3	1	166.241		206653		316.19	221.333
CCOCCCCS(O)(=O)=O	6	14	0	4	1	182.24		123.568		359.38	251.566
C[CH](O)CC(C)(C)S(O)(=O)=O	6	14	0	4	1	182.24		23.7329		372.1	260.47
CCCC(S(C)(=O)=O)S(C)(=O)=O	6	14	0	4	2	214.306		890.315		374.07	261.849
CS(=O)(=O)SCCCCSS(C)(=O)=O	6	14	0	4	4	278.438		5.97851		421.02	294.714
CS(=O)(=O)CCOCCS(C)(=O)=O	6	14	0	5	2	230.306		209.451		392.1	274.47
CS(=O)(=O)OCCCCOS(C)(=O)=O	6	14	0	6	2	246.305		1.22472	560.15	402.94	392.105
COS(=O)(=O)CCCCS(=O)(=O)OC	6	14	0	6	2	246.305		88.1427		402.94	282.058
CS(=O)(=O)OC[CH](O)[CH](O)COS(C)(=O)=O	6	14	0	8	2	278.304		0.00564615		404.16	282.912
CS(=O)(=O)OC[CH](O)[CH](O)COS(C)(=O)=O	6	14	0	8	2	278.304		0.00564615
CS(=O)(=O)OC[CH](O)[CH](O)COS(C)(=O)=O	6	14	0	8	2	278.304		0.00564615
CC(=O)C1=CC=CS1	6	6	0	1	1	126.179		1.24259e+06	283.65	295.02	198.555
OC1=CC=C(S)C=C1	6	6	0	1	1	126.179		123580		314.34	220.038
COC(=O)C1=CC=CS1	6	6	0	2	1	142.178		2.07345e+06		292.97	205.079
OC(=O)CSC1=CSC=C1	6	6	0	2	2	174.244		1350.24		373.32	261.324
OS(=O)(=O)C1=CC=CC=C1	6	6	0	3	1	158.178		145.557	338.15	361.9	236.705
OC1=CC=C(C=C1)S(O)(=O)=O	6	6	0	4	1	174.177		3.12124		401.89	281.323
[truncated: 721 more rows]
