# Supplementary material for: Predictions of the glass transition temperature and viscosity of organic aerosols from volatility distributions
Source: Copernicus journal article supplement (doi:10.5194/acp-20-8103-2020), 2020-07-13
Supplement: Supplementary file 2 [file acp-20-8103-2020-supplement.zip]

Archive with 4 entries (4 files):
- Li et al. OA viscosity_Table S2.xls
- acp-20-8103-2020-supplement-title-page.pdf
- Li et al. OA viscosity_Table S3.xls
- SI Li et al. OA viscosity ACP.pdf
