# Supplementary material for: Predictions of the glass transition temperature and viscosity of organic aerosols from volatility distributions
Source: Copernicus journal article supplement (doi:10.5194/acp-20-8103-2020), 2020-07-13
Supplement: Supplementary file 2 [file acp-20-8103-2020-supplement.zip › SI Li et al. OA viscosity ACP.pdf]

*Supplement of*

**Predictions of the glass transition temperature and viscosity of organic aerosols from volatility distributions**

**Ying Li<sup>1,\*</sup>, Douglas A. Day<sup>2,3</sup>, Harald Stark<sup>2,3,4</sup>, Jose L. Jimenez<sup>2,3</sup> and Manabu Shiraiwa<sup>1,\*</sup>**

[1] Department of Chemistry, University of California, Irvine, CA 92697-2025, USA

[2] Cooperative Institute for Research in Environmental Sciences (CIRES), University of Colorado, Boulder, CO 80309, USA

[3] Department of Chemistry, University of Colorado, Boulder, CO 80309, USA

[4] Aerodyne Research Inc., Billerica, Massachusetts 01821, USA

\*Correspondence to: Ying Li (yingl47@uci.edu) or Manabu Shiraiwa (m.shiraiwa@uci.edu)

*To be submitted to Atmospheric Chemistry and Physics Discussions (ACPD)*

Table S1. Number of the compounds included in the training dataset and their  $T_g$ ,  $C^0$  and  $T_m$  measured or otherwise estimated.

|                                                                             | CH  | CHO | CHON | CHOS |
|-----------------------------------------------------------------------------|-----|-----|------|------|
| Both $T_g$ and $C^0$ measured                                               | 38  | 125 | 5    | 0    |
| Measured $T_g$ , $C^0$ estimated from EPI Suite                             | 4   | 134 | 30   | 1    |
| $T_g$ estimated from measured $T_m$ , measured $C^0$                        | 391 | 537 | 241  | 18   |
| $T_g$ estimated from $T_m$ , $T_m$ estimated from EPI Suite, measured $C^0$ | 0   | 0   | 0    | 11   |
| $T_g$ estimated from measured $T_m$ , $C^0$ estimated from EPI Suite        | 0   | 0   | 0    | 63   |
| $T_g$ estimated from $T_m$ , $T_m$ and $C^0$ estimated from EPI Suite       | 0   | 0   | 0    | 850  |

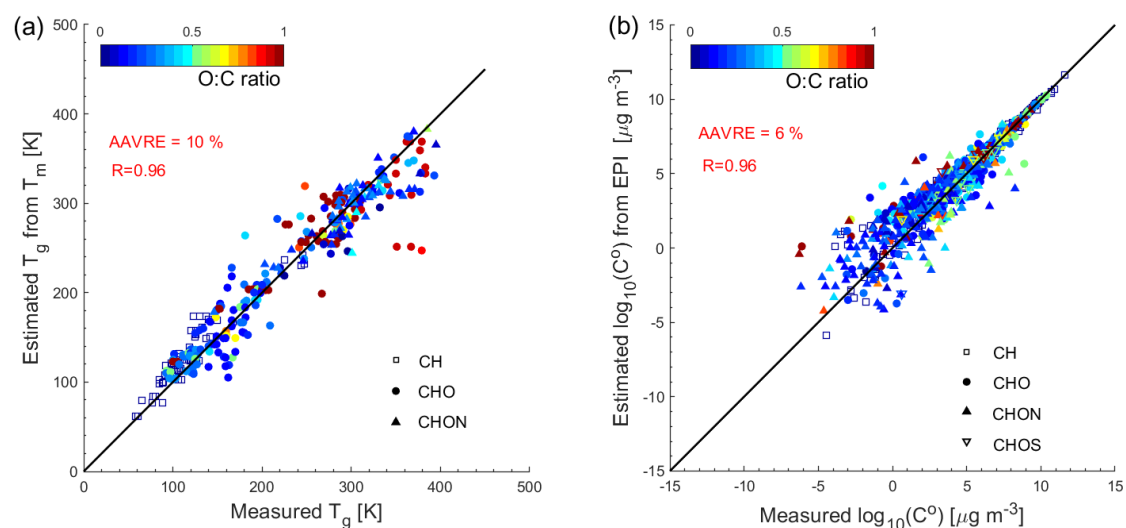

Figure S1. (a) Comparison of the measured  $T_g$  (Koop et al., 2011; Dette et al., 2014; Rothfuss and Petters, 2017; Lessmeier et al., 2018; Zhang et al., 2019) and the  $T_g$  estimated by the Boyer–Kauzmann rule for 336 organic compounds with their measured  $T_m$  available. (b) Comparison of pure compound saturation mass concentration ( $C^0$ ) measured and estimated from the EPI suite for 1637 organic compounds included in the training dataset.

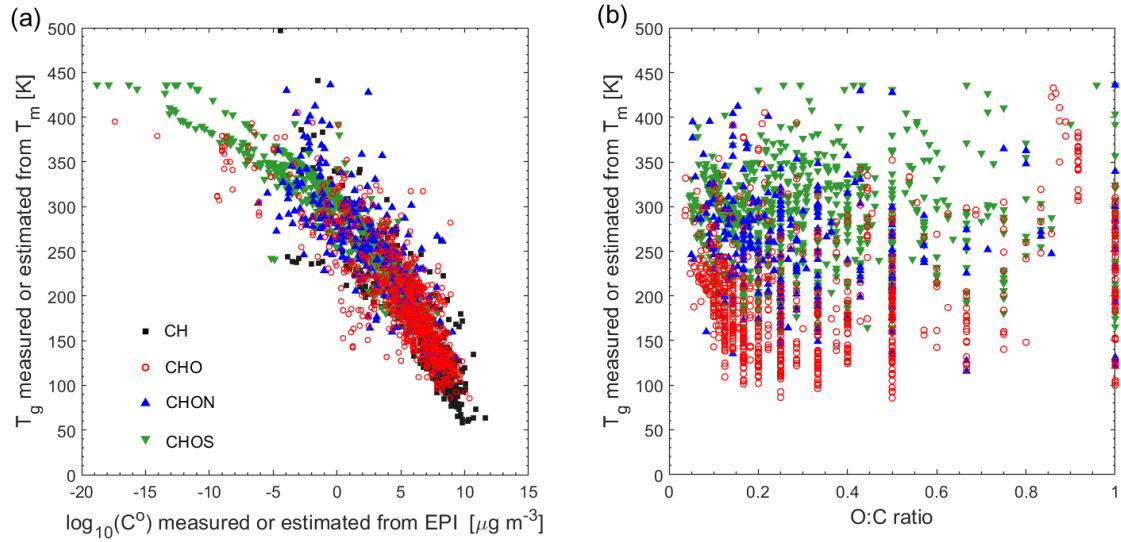

Figure S2.  $T_g$  of organic compounds in the training dataset plotted against (a) pure compound saturation mass concentration ( $C^0$ ) and (b) the atomic O:C ratio.

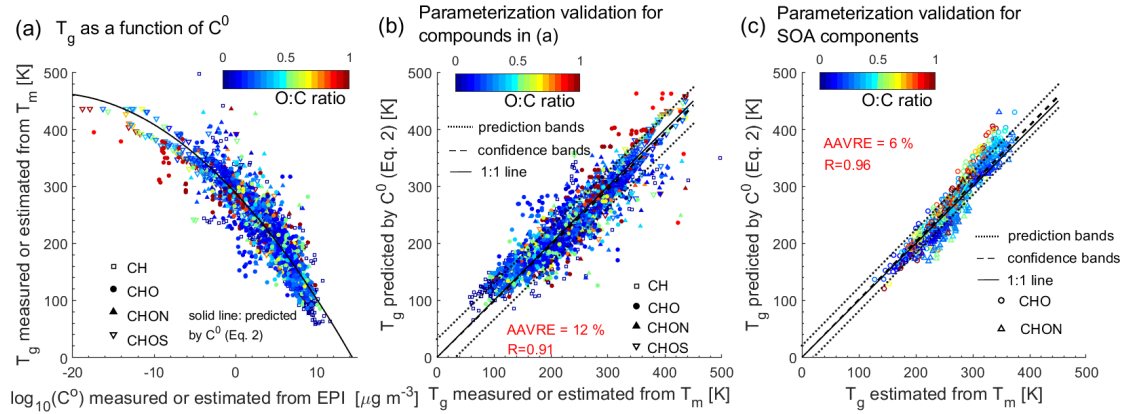

Figure S3. (a)  $T_g$  of organic compounds in the training dataset plotted against  $C^0$ . The solid line shows the predictions of  $T_g$  by  $C^0$  (Eq. 2). (b) Predicted  $T_g$  by  $C^0$  (Eq. 2) for compounds shown in (a) compared to measured or otherwise estimated  $T_g$  from  $T_m$ . (c) Predicted  $T_g$  for SOA components (Shiraiwa et al., 2014) using Eq. (2) plotted against estimated  $T_g$  from  $T_m$  with the Boyer-Kauzmann rule. The correlation coefficient ( $R$ ) and the average absolute value of the relative error (AAVRE) are shown. The dashed and dotted lines in (b) and (c) show 68% confidence and prediction bands, respectively.

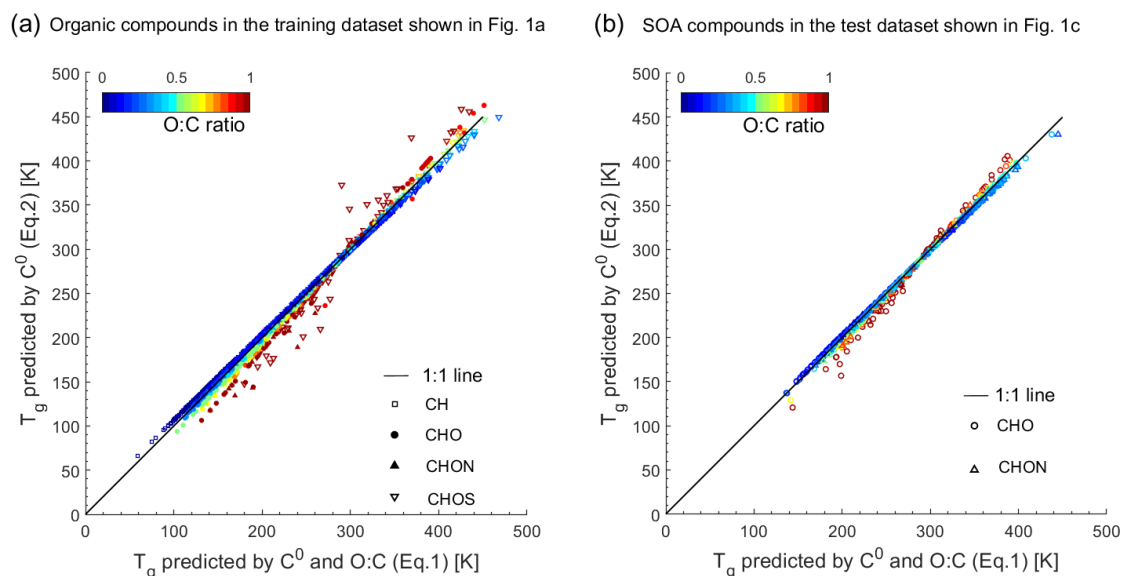

**Figure S4.**  $T_g$  predicted as a function of  $C^0$  using Eq. (2) compared to  $T_g$  predicted as a function of  $C^0$  and the O:C ratio using Eq. (1) for (a) organic compounds included in the training dataset and (b) SOA components (Shiraiwa et al., 2014) in the test dataset.

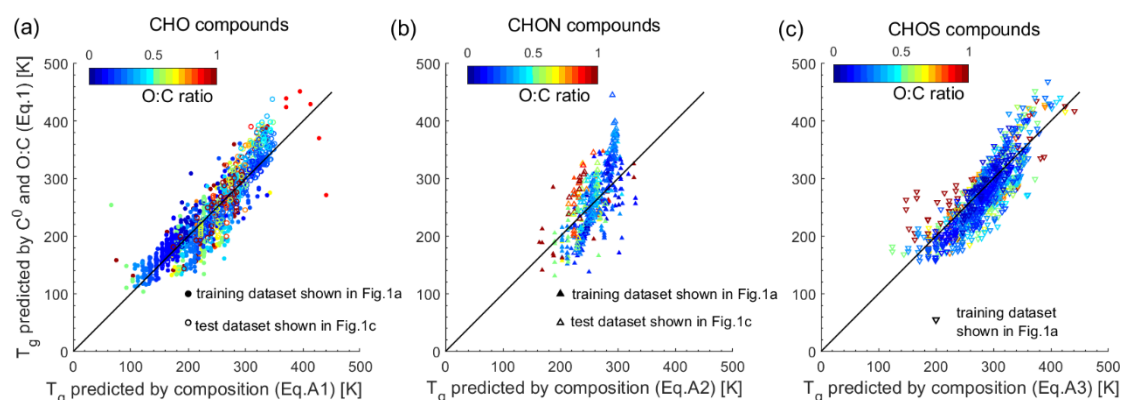

**Figure S5.**  $T_g$  predicted as a function of  $C^0$  and the O:C ratio using Eq. (1) compared to  $T_g$  predicted as a function of elemental compositions using (a) Eq. (A1) for CHO compounds, (b) Eq. (A2) for CHON compounds, and (c) Eq. (A3) for CHOS compounds. The solid line shows the 1:1 line.

## References:

- Detle, H. P., Qi, M., Schröder, D. C., Godt, A. and Koop, T.: Glass-forming properties of 3-methylbutane-1,2,3-tricarboxylic acid and its mixtures with water and pinonic acid, *J. Phys. Chem. A*, 118, 7024-7033, <https://doi.org/10.1021/jp505910w>, 2014.
- Koop, T., Bookhold, J., Shiraiwa, M. and Poschl, U.: Glass transition and phase state of organic compounds: dependency on molecular properties and implications for secondary organic aerosols in the atmosphere, *Phys. Chem. Chem. Phys.*, 13, 19238-19255, 10.1039/C1CP22617G, 2011.
- Lessmeier, J., Dette, H. P., Godt, A. and Koop, T.: Physical state of 2-methylbutane-1,2,3,4-tetraol in pure and internally mixed aerosols, *Atmos. Chem. Phys.*, 18, 15841-15857, 10.5194/acp-18-15841-2018, 2018.
- Rothfuss, N. E. and Petters, M. D.: Influence of Functional Groups on the Viscosity of Organic Aerosol, *Environ. Sci. Technol.*, 51, 271-279, 10.1021/acs.est.6b04478, 2017.
- Shiraiwa, M., Berkemeier, T., Schilling-Fahnestock, K. A., Seinfeld, J. H. and Pöschl, U.: Molecular corridors and kinetic regimes in the multiphase chemical evolution of secondary organic aerosol, *Atmos. Chem. Phys.*, 14, 8323-8341, 10.5194/acp-14-8323-2014, 2014.
- Zhang, Y., Niehman, L., Spencer, P., Jung, J. I., Lee, A., Heffernan, B. K., Gold, A., Zhang, Z., Chen, Y., Canagaratna, M. R., Jayne, J. T., Worsnop, D. R., Onasch, T. B., Surratt, J. D., Chandler, D., Davidovits, P. and Kolb, C. E.: The cooling rate and volatility dependent glass forming properties of organic aerosols measured by Broadband Dielectric Spectroscopy, *Environ. Sci. & Technol.*, 53, 12366-12378, <https://doi.org/10.1021/acs.est.9b03317>, 2019.
