# Supplementary material for: Predictions of the glass transition temperature and viscosity of organic aerosols from volatility distributions
Source: Copernicus journal article supplement (doi:10.5194/acp-20-8103-2020), 2020-07-13
Supplement: Supplementary file 2 [file Li et al. OA viscosity_Table S3.xls]

## Sheet: Sheet1
Table S3 Field measured volatility distributions.
Sampling Site	Centreville, Alabama, US (32.95° N, 87.13° W)							Amazon, Brazil (3.213° S, 60.599° W)	Colorado Rocky Mountains, US (39.1006° N, 105.0942° W)	Athens, Greece (37°58' N, 23°42' E)					Paris, France											Mexico city (19°29' N, 99°09' W)						Finokalia, Greece (35°20' N, 25°40' E)	Pasadena, US (34.1406° N, 118.1225° W)	Raleigh, US (35.786° N, 78.669° W)	Durham, US (35.856° N, 78.820° W)				Beijing, China (39.97° N, 116.37° E)
Campaign	Southern Oxidant and Aerosol Study (SOAS)							Green Ocean Amazon (GoAmazon2014/5, IOP2)	BEACHON-RoMBAS						MEGAPOLI											MILAGRO						FAME	CalNex
Period	1 June - 15 July, 2013							15 August - 15 October, 2014	July and August, 2011	10 January - 9 February					1-31 July 2009, 12 January -16 February 2010 (Beekmann et al., 2015)											10 March - 31 March 2006						8 May - 9 June 2008	15 May - 15 June 2010	18 October - 20 November 2013	1 June - 2 July 2015; 18 January - 20 February 2016				20 May - 23 June, 2018
Site condition	Mixed forest							dry season in central Amazonia	pine forest (Ortega et al., 2014)	Urban backfround					Urban (Beekmann et al., 2015)											Urban						Remote	Urban	Urban	near-road aerosols near an interstate highway				Urban
Average COA (μg m-3)	5.2 (Stark et al., 2017)							10.4 (Hu et al., 2016)	1.9 (Stark et al., 2017)	8.5 (Florou et al., 2016)					6.08 (winter, Juranyi et al., 2013); 2.45 (summer, Beekmann et al., 2015)											15.68 (Cappa & Jimemez, 2010)						2.8 (Lee et al., 2010)	7 (Hayes et al., 2013)	6.7 (Saha et al., 2017)	5 (Saha et al., ACP, 2018)				12.7 (Xu et al., 2019)
Average T (K)	298 (Hu et al., 2016)							298.9 (Wimmer et al., 2018)	291 (Stark et al., 2017)	285.5 (Florou et al., 2016)					275 (winter, Juranyi et al., 2013); 291 (summer, Beekmann et al., 2015)											291 (Aiken et al., 2010)						293 (Pikridas et al., 2010)	291.2 (Hayes et al., 2013)	285.7 (Saha et al., 2017)	299 (summer), 279 (winter) (Saha et al., AE, 2018)				299.4
Average RH (%)	83% (Hu et al., 2016)							94.6 (Wimmer et al., 2018)	59 (Crawford et al., 2014)	71 (Florou et al., 2016)					86 (winter, Juranyi et al., 2013); 67 (summer, Beekmann et al., 2015)											43 (Aiken et al., 2010)						63 (Pikridas et al., 2010)	83.6 (Hayes et al., 2013)	65.7 (Saha et al., 2017)	72 (summer), 66 (winter) (Saha et al., AE, 2018)				40.3
OA type	Total OA						IEPOX-SOA	Total OA	Total OA	Total OA	OOA	HOA	BBOA	COA	TOA (winter)	HOA (winter)	COA (winter)	BBOA (winter)	OOA (winter)	TOA (summer)	HOA (summer)	COA (summer)	MOA (summer)	SV-OOA (summer)	LV-OOA (summer)	TOA	HOA	BBOA	OOA	LV-OOA	SV-OOA	TOA	TOA	TOA	TOA(10 m downwind distance from the highway, Summer)	TOA (220 m downwind distance from the highway, summer)	TOA(10 m downwind distance from the highway, winter)	TOA (220 m downwind distance from the highway, winter)	TOA	HOA	COA	LO-OOA	MO-OOA
Average O:C	0.75 (Xu et al., 2015)						0.62	0.8 (Background conditions, Thalman et al., 2017)	0.55 (Palm et al., 2017)	0.32 (Florou et al., 2016)	0.46	0.13	0.27	0.11	0.47 (von der Weiden-Reinmuller et al., 2014)					0.38 (Crippa et al., 2013)	0.16 (Crippa et al., 2013)	0.13 (Crippa et al., 2013)	0.57 (Crippa et al., 2013)	0.39 (Crippa et al., 2013)	0.73 (Crippa et al., 2013)	0.41 (Aiken et al., 2008)	0.16 (Aiken et al., 2009)	0.3 (Aiken et al., 2009)	0.6 (Aiken et al., 2009)	0.83 (Aiken et al., 2008)	0.52 (Aiken et al., 2008)	0.8 (Hildebrandt et al., 2010 )	0.43 (Hayes et al., 2013)	assume same as the O:C of 0.6 in winter in Durham	0.7 (summer, Saha et al., EST, 2018); 0.6 (winter, Saha et al., EST, 2018)				0.68	0.17	0.27	0.76	1.3
Note					a																											b		a
log C* (μg m-3)	(Stark et al., 2017)			(Hu et al., 2016)	(Saha et al., 2017)	(Shiraiwa et al., 2017)	(Hu et al., 2016)	(Hu et al., 2016)	(Stark et al., 2017)	(Louvaris et al., 2017)					(Paciga et al., 2016)											(Cappa & Jimenez, 2010)						(Lee et al., 2010)	(Ortega et al., 2016)	(Saha et al., 2017)	(Saha et al., ACP, 2018)				(Xu et al., 2019)
																																Condensed-phase mass fraction in each volatility bin
	Thermograms Method	Partitioning method	Formulas Method			EMAC model																													10 m from the highway (summer)	220 m from the highway (summer)	10 m from the highway (winter)	220 m from the highway (winter)
-14	0	0	0.000200037	0
-13	0	0	0.00027431	0
-12	0	0	0.000631695	0
-11	0	0	0.000693317	0
-10	0	0	0.000484033	0
-9	0	0	0.0010466	0.107567			0.0462131	0.133127																									0.06
-8	0	0	0.000707817	0.0130177			0.0224647	0.0456656	0.0957465	0.3	0.41	0.3	0.1	0.1																			0.04
-7	0.0108981	0	0.00146875	0.0391892			0.0892169	0.0584365	0.0558858						0	0	0	0	0	0	0	0	0	0	0.2	0	0	0	0	0.351833	0		0.05		0	0	0	0
-6	0.056937	0	0.00330929	0.0578753			0.12516	0.0797214	0.0555501						0	0	0.12	0	0	0	0	0	0	0	0.24	0.0904573	0.0405405	0	0.11295	0.239841	0		0.07		0	0	0	0
-5	0.177394	8.74837e-08	0.0103114	0.0957715			0.137997	0.0955882	0.0674193						0	0	0.11	0	0	0	0	0.13	0	0	0.28	0.0924453	0.0432432	0.0131827	0.11295	0.158573	0.0717054		0.08		0	0	0	0	0.132497	0.12553	0	0	0
-4	0.211723	9.59099e-08	0.018967	0.135241	0.389372		0.172657	0.111842	0.0818469						0.31	0.11	0.14	0.2	0.3	0.252	0.13	0.15	0.03	0.06	0.25	0.0924453	0.0495495	0.0207156	0.11295	0.104063	0.0852713		0.14	0.27	0.09	0.11	0.22	0.3	0	0	0	0	0
-3	0.195295	2.58512e-05	0.0163722	0.149116	0.0758518		0.216303	0.131579	0.135093	0.08	0.11	0.07	0.1	0.52	0.107	0.09	0.42	0.09	0.09	0.119	0.14	0.07	0.03	0.14	0.03	0.0964215	0.0594595	0.0386064	0.116845	0.0664024	0.106589	0.2	0.11	0.09	0.16	0.22	0.08	0.08	0	0	0.0986469	0.100166	0.159092
-2	0.169015	0.000331123	0.0442815	0.138714	0.0625777		0.127728	0.128483	0.132705	0.12	0.09	0.14	0.15	0.08	0.07	0.07	0.11	0.08	0.07	0.135	0.08	0.2	0.05	0.15	0	0.102386	0.0810811	0.0734463	0.12074	0.0416254	0.132752	0.2	0.09	0.1	0.2	0.21	0.17	0.21	0.113408	0.097973	0.117159	0.0740302	0.106316
-1	0.105733	0.00556985	0.0454806	0.141219	0.119196		0.029525	0.106424	0.133104	0.12	0.08	0.21	0.15	0.05	0.089	0.12	0.1	0.13	0.09	0.125	0.02	0.08	0.28	0.13	0	0.116302	0.127928	0.143126	0.12853	0.0218038	0.167636	0.3	0.15	0.11	0.33	0.38	0.18	0.31	0.119887	0.107999	0.189085	0.125976	0.132955
0	0.0647508	0.198741	0.0581191	0.122288	0.186129	0.65869	0.0327343	0.0743034	0.144293	0.12	0.11	0.17	0.14	0.07	0.083	0.11	0	0.09	0.1	0.145	0.06	0.37	0.42	0.18	0	0.154076	0.215315	0.265537	0.146056	0.0158573	0.215116	0.3	0.11	0.22	0.12	0.05	0.27	0.08	0.165127	0.154645	0.223587	0.193707	0.184895
1	0	0.68768	0.0430447	0	0.166874	0.192077		0.0348297	0.0551245	0.26	0.2	0.11	0.36	0.18	0.323	0.5	0	0.41	0.35	0.231	0.57	0	0.19	0.34	0	0.164016	0.252252	0.306026	0.116845	0	0.175388		0.11	0.22	0.1	0.02	0.08	0.02	0.192541	0.222139	0.123745	0.239377	0.167347
2	4.74186e-08	0.089611	0.0821784	0		0.12521			0.0432332						0	0	0	0	0	0	0	0	0	0	0	0.0765408	0.109009	0.121469	0.0321324	0	0.0455426				0	0	0	0	0.276539	0.291713	0.247777	0.266745	0.249395
3	0.00825358	0.00204383	0.0370561	0		0.0240231									0	0	0	0	0	0	0	0	0	0	0	0.0149105	0.0216216	0.0178908	0	0	0				0	0	0	0
4	0	1.73605e-05	0.150963	0
5	0	7.26695e-07	0.151799	0
6	0	0	0.062615	0
7	0	0	0.247894	0
8	0	0	0.0217898	0
a Calculated from the fraction of the total organic material (vapor + aerosol) in each volatility bin in Table 1 (campaign-average dual-TD data) in Saha et al. (2017).
b The best-fit volatility distributions (assuming the mass accommodation coefficient of 1) suggested by Lee et al. (2010).
